# Supplementary material
Source: PubMed Central journal article supplement (PMC3278048)
Supplement: 112299_supp.pdf [file 112299_supp.pdf]

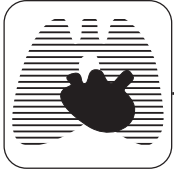

### **Diagnosis of DVT**

#### **Antithrombotic Therapy and Prevention of Thrombosis, 9th ed: American College of Chest Physicians Evidence-Based Clinical Practice Guidelines**

*Shannon M Bates, MDCM; Roman Jaeschke, MD; Scott M. Stevens, MD;  
Steven Goodacre, MBChB, PhD; Philip S. Wells, MD; Matthew D. Stevenson, PhD;  
Clive Kearon, MD, PhD; Holger J. Schünemann, MD, PhD, FCCP; Mark Crowther, MD;  
Stephen G. Pauker, MD; Regina Makdissi, MD; and Gordon H. Guyatt, MD, FCCP*

**Table S1—Modeled Diagnostic Strategies**

| Number | Strategy                                                                                                                                                                                                                                                                                                                                                                                                  | Source                                                                                                                                                |
|--------|-----------------------------------------------------------------------------------------------------------------------------------------------------------------------------------------------------------------------------------------------------------------------------------------------------------------------------------------------------------------------------------------------------------|-------------------------------------------------------------------------------------------------------------------------------------------------------|
| 0      | No testing or treatment                                                                                                                                                                                                                                                                                                                                                                                   |                                                                                                                                                       |
| 1      | Venography for all patients                                                                                                                                                                                                                                                                                                                                                                               |                                                                                                                                                       |
| 2      | Proximal US, repeat if negative                                                                                                                                                                                                                                                                                                                                                                           |                                                                                                                                                       |
| 3      | Whole-leg US, repeat if isolated calf vein DVT diagnosed                                                                                                                                                                                                                                                                                                                                                  | Gibson et al, <sup>1</sup> Bernardi et al, <sup>2</sup> Johnson et al, <sup>3</sup> Elias et al, <sup>4</sup>                                         |
| 4      | Whole-leg US, treat if calf vein DVT diagnosed                                                                                                                                                                                                                                                                                                                                                            | Schellong et al, <sup>5</sup> Sevestre et al, <sup>6</sup> Sevestre et al, <sup>7</sup> Stevens et al, <sup>8</sup><br>Subramaniam et al <sup>9</sup> |
| 5      | Proximal US, no repeat                                                                                                                                                                                                                                                                                                                                                                                    | Anderson et al, <sup>10</sup> Wells et al, <sup>11</sup> Wells et al <sup>12</sup>                                                                    |
| 6      | Wells score and proximal US. If PTP low, discharge if US negative; venogram if positive. If PTP moderate, repeat US if negative, treat if positive. If high PTP, venogram if US negative, treat if US positive.                                                                                                                                                                                           |                                                                                                                                                       |
| 7      | Simplified DD and proximal US. If US positive, then treat. If both are negative, then discharge. If DD positive and US negative, repeat US.                                                                                                                                                                                                                                                               | Kraaijenhagen et al <sup>13</sup>                                                                                                                     |
| 8      | Wells score and proximal US. If PTP high or moderate, perform proximal US. If positive treat, venogram if negative. If PTP low, perform proximal US. If positive treat, discharge if negative.                                                                                                                                                                                                            | Walsh et al <sup>14</sup>                                                                                                                             |
| 9      | Wells score and full-leg US. If PTP high or moderate, perform full-leg US; treat if positive, venogram if negative. If PTP low, full-leg US; treat if positive, discharge if negative.                                                                                                                                                                                                                    | Walsh et al <sup>14</sup>                                                                                                                             |
| 10     | Quantitative latex DD. If positive, perform proximal US and repeat. If DD negative, perform Wells score. If high, perform proximal US and repeat if negative. If PTP moderate or low, discharge.                                                                                                                                                                                                          | Bates et al <sup>15</sup>                                                                                                                             |
| 11     | Quantitative latex DD: if positive, perform above-knee US and repeat. If DD negative, perform Wells score. If PTP high, perform proximal US. PTP low or moderate, discharge.                                                                                                                                                                                                                              | Schutgens et al <sup>16</sup>                                                                                                                         |
| 12     | Wells score. If PTP high, perform proximal US, treat if positive, perform Simplified DD if negative. If DD positive, perform venogram, if negative repeat US. If PTP moderate, perform US; treat if positive, Simplified DD if negative. If DD positive, repeat proximal US. If DD negative, discharge. If PTP low, perform Simplified DD. If DD positive, perform proximal US. Discharge if DD negative. | Anderson et al <sup>17</sup>                                                                                                                          |
| 13     | Wells score and Simplified DD. If PTP high or moderate, or DD positive, perform full-leg US. If PTP low and DD negative, then discharge.                                                                                                                                                                                                                                                                  | Janes and Ashford <sup>18</sup>                                                                                                                       |
| 14     | ELISA DD. If negative, discharge. If DD positive, perform proximal US. Treat if US positive. If US negative, perform Wells score. If PTP high, perform venogram. If PTP moderate or low, discharge.                                                                                                                                                                                                       | Perrier et al <sup>19</sup>                                                                                                                           |
| 15     | Wells score. If PTP high or moderate, perform proximal US. If positive treat, if negative perform Simplified DD. Repeat US if DD positive, discharge if DD negative. If PTP low, perform US. Discharge if negative, treat if positive.                                                                                                                                                                    | Tick et al <sup>20</sup>                                                                                                                              |
| 16     | Wells score. If PTP high or moderate, perform proximal US. If positive treat, if negative perform Simplified DD. Repeat US if DD positive and discharge if DD negative. If PTP low, perform Simplified DD; discharge if negative, perform proximal US if positive.                                                                                                                                        | Wells et al, <sup>21</sup> intervention group (high and moderate combined)                                                                            |
| 17     | Wells score. If PTP high, perform proximal US. If positive treat, if negative perform Simplified DD. Repeat US if DD positive, discharge if DD negative. If PTP moderate or low, perform Simplified DD. Discharge if negative, perform proximal US if positive.                                                                                                                                           | Wells et al, <sup>21</sup> intervention group (moderate and low combined)                                                                             |
| 18     | Wells score. If PTP high or moderate, perform proximal US. If positive treat, if negative repeat US. If PTP low, perform proximal US; treat if positive, discharge if negative.                                                                                                                                                                                                                           | Wells et al, <sup>21</sup> control group (high and moderate combined)                                                                                 |
| 19     | Wells score. If PTP high, perform proximal US. If positive treat, if negative repeat US. If PTP moderate or low, perform proximal US; treat if positive, discharge if negative.                                                                                                                                                                                                                           | Wells et al, <sup>21</sup> control group (moderate and low combined)                                                                                  |
| 20     | Wells score. If PTP high or moderate, perform proximal US. Treat if positive, if negative discharge. If PTP low, discharge.                                                                                                                                                                                                                                                                               | UK survey                                                                                                                                             |
| 21     | Perform Simplified DD. Discharge if negative, perform above-knee US if positive. Treat if US positive, repeat US if initial US is negative.                                                                                                                                                                                                                                                               | UK survey                                                                                                                                             |

In all algorithms, repeat US means that a proximal US is performed 1 week later. DD = D-dimer; ELISA = enzyme-linked immunosorbent assay; PTP = pretest probability; US = ultrasound.

**Table S2—Methodology Table for Diagnostic Studies Assessing Venography in Patients With Suspected Lower Extremity DVT: Individual Management Studies With Cohorts**

| Study Details      |                                          |                                        |                                                      |                         |           |                               |                                                                                                                                                                                                                                                                                                          |                          |
|--------------------|------------------------------------------|----------------------------------------|------------------------------------------------------|-------------------------|-----------|-------------------------------|----------------------------------------------------------------------------------------------------------------------------------------------------------------------------------------------------------------------------------------------------------------------------------------------------------|--------------------------|
| Patient Population | Diagnostic Test                          | Outcome                                | Methods<br>(Single-Arm Cohort<br>vs Cohort From RCT) | Consecutive<br>Patients | Follow-up | Received<br>Alternative Tests | Comments                                                                                                                                                                                                                                                                                                 | Source                   |
| Suspected DVT      | Technically adequate,<br>normal venogram | Probability of VTE<br>during follow-up | Single-arm cohort                                    | Yes                     | 3 mo      | No                            | N = 160 outpatients with normal<br>venography; 2 patients<br>returned for investigation of<br>new symptoms in the same leg<br>during follow-up (day 2, day 8).<br>New DVT was diagnosed by<br>abnormal IPC in one<br>(venography unsuccessful) and<br>by repeat venography in another<br>(calf vein DVT) | Hull et al <sup>22</sup> |

Cohorts from single-arm studies or cohorts representing one of the arms of an RCT. IPC = impedance plethysmography; RCT = randomized controlled trial.

**Table S3—Descriptive Table for Cross-sectional Accuracy and Prospective Cohort Studies Assessing Venography for Evaluation of Suspected Lower Extremity DVT**

| Question From Structured Clinical Question Table | Clinical Situation/ Question                                                   | Meta-analysis vs Primary Study | Reference Standard | Patient Population          | Outcome Measure <sup>a</sup> | Result                                                                                | Comments                                                                                                                                                                                                                                                                      | Reference                |
|--------------------------------------------------|--------------------------------------------------------------------------------|--------------------------------|--------------------|-----------------------------|------------------------------|---------------------------------------------------------------------------------------|-------------------------------------------------------------------------------------------------------------------------------------------------------------------------------------------------------------------------------------------------------------------------------|--------------------------|
| Suspected lower extremity DVT (Section 2.0)      | What are the consequences of using venography to diagnose lower extremity DVT? | N/A                            | N/A                | Patients with suspected DVT | N/A                          | N/A                                                                                   | Implied reference standard                                                                                                                                                                                                                                                    | N/A                      |
|                                                  | What are the consequences of using venography to rule out lower extremity DVT? | Primary study                  | 3-mo follow-up     | Patients with suspected DVT | 3 mo follow-up               | DVT diagnosed during follow-up in 2 of 160 patients (NPV, 98.8%; 95% CI, 95.6%-99.8%) | N = 160 outpatients with normal venography; 2 patients returned for investigation of new symptoms in the same leg during follow-up (day 2, day 8). New DVT was diagnosed by abnormal IPG in one (venography unsuccessful) and by repeat venography in another (calf vein DVT) | Hull et al <sup>23</sup> |

N/A = not applicable; NPV = negative predictive value; TP = test probability. See Table S1 and S2 legends for expansion of other abbreviations.  
<sup>a</sup>eg, Post-TP during 3 mo follow-up; sensitivity or specificity, and so forth.

**Table S4—Evidence Profile Table for Diagnostic Studies Assessing Venography in Patients With Suspected DVT: Should a Normal Venogram Be Used to Rule Out DVT?**

| No of Studies (Patients) | Quality Assessment                  |                      |               |              |                     |                                      | Summary of Findings         |                 | Importance |
|--------------------------|-------------------------------------|----------------------|---------------|--------------|---------------------|--------------------------------------|-----------------------------|-----------------|------------|
|                          | Design                              | Limitations          | Inconsistency | Indirectness | Imprecision         | Other Considerations                 | Accuracy Indices % (95% CI) | Normal Venogram |            |
| 1 (160)                  | Single-arm prospective cohort study | Serious <sup>a</sup> | Single study  | N/A          | 95% CI, 95.6%-99.8% | 3-mo follow-up as reference standard | 98.8%                       | Moderate        | Critical   |

Negative predictive value of a normal venogram for DVT compared with confirmed recurrent VTE during 3-mo follow-up

Bibliography: Hull R, Hirsh J, Sackett DL, et al. Clinical validity of a negative venogram in patients with clinically suspected venous thrombosis. *Circulation*. 1981;64(3):622-625. Settings: outpatients.  
<sup>a</sup>Prevalence of DVT in original population not specified.

**Table S5—[Sections 3.1-3.5] Methodology of Diagnostic Studies Assessing DD, PTP, and Proximal US for the Diagnosis of Suspected First Lower Extremity DVT: Meta-analysis of Accuracy Studies**

| Study/Year                         | Study Eligibility                                         |                  |                                                        | Exploration of Heterogeneity                                                                | Comments                                                                                             |
|------------------------------------|-----------------------------------------------------------|------------------|--------------------------------------------------------|---------------------------------------------------------------------------------------------|------------------------------------------------------------------------------------------------------|
|                                    | Patient Population                                        | Diagnostic Test  | Outcome (Criterion Standard)                           |                                                                                             |                                                                                                      |
| Goodacre et al <sup>23</sup> /2005 | Clinically suspected DVT                                  | US               | Venography                                             | Tested for influence of consecutive patients, blind reading of tests, underlying prevalence | Accuracy                                                                                             |
| Geersing et al <sup>24</sup> /2009 | Suspected DVT, point of care, 23 studies, 13,959 patients | Point of care DD | US, venography, or 3 mo clinical follow-up or combined | Tested for a number of factors (ie, recurrent DVT, % with malignancy or surgery, DVT vs PE) | VTE (PE or DVT examined). Both accuracy and management studies (no imaging for some groups) included |
| Goodacre et al <sup>25</sup> /2005 | Suspected DVT                                             | DD               | US, venography and/or plethysmography                  | Tested for patient-mix, ED only, outpatients only, and so forth                             |                                                                                                      |
| DiNisio et al <sup>26</sup> /2007  | Suspected DVT                                             | DD               | US, venography, and/or plethysmography                 | 17 patient and design characteristics examined                                              | VTE (DVT and PE) included                                                                            |
| Stein et al <sup>27</sup> /2004    | Suspected DVT                                             | DD               | US, venography, and/or plethysmography                 | Tested for DD used                                                                          |                                                                                                      |

All studies are cross-sectional unless otherwise indicated under Comments. PE = pulmonary embolism. See Table S1 legend for expansion of other abbreviation.

**Table S6—[Sections 3.1-3.5] Methodology of Diagnostic Studies Assessing DD, PTP, and Proximal US for the Diagnosis of Suspected First Lower Extremity DVT: Individual Accuracy Studies**

| Study/Year                           | Study Details      |                                                           |                                                                                     | Consecutive Patients | Independent Test Assessment |
|--------------------------------------|--------------------|-----------------------------------------------------------|-------------------------------------------------------------------------------------|----------------------|-----------------------------|
|                                      | Patient Population | Diagnostic Test                                           | Outcome (Criterion Standard)                                                        |                      |                             |
| Subramaniam et al <sup>28</sup> 2006 | ED patients        | Wells score (likely or unlikely), moderately sensitive DD | Whole-leg US plus 3-mo follow-up in those with a negative US result at presentation | Yes                  | Yes                         |

See Table S1 legend for expansion of abbreviations.

**Table S7—[Sections 3.1-3.5] Methodology of Diagnostic Studies Assessing DD, PTP, and Proximal US for the Diagnosis of Suspected First Lower Extremity DVT: Meta-analysis of Management Cohort Studies**

| Study/Year                        | Study Eligibility                                                                       |                                        |                                     | Methods (Single-Arm Cohort vs Cohort From RCT)           | Exploration of Heterogeneity              |
|-----------------------------------|-----------------------------------------------------------------------------------------|----------------------------------------|-------------------------------------|----------------------------------------------------------|-------------------------------------------|
|                                   | Patient Population                                                                      | Diagnostic Test                        | Outcome                             |                                                          |                                           |
| Fancher et al <sup>29</sup> /2004 | Clinically suspected DVT, primary vs referred not specified; 12 studies, 5,431 patients | DD combined with different PTP         | 3-mo probability of symptomatic VTE | Cohorts from both single-arm prospective studies and RCT | Presence of previous VTE, type of DD used |
| Wells et al <sup>30</sup> /2006   | Mixed; 14 studies, 8,329 patients                                                       | PTP and DD                             | 3-mo probability of VTE             | Single-arm cohorts                                       |                                           |
| Righini et al <sup>31</sup> /2008 | Clinically suspected DVT; 6 studies, 5,876 patients                                     | Serial proximal CUS (one did CUS once) | 3-mo probability of symptomatic VTE | Single-arm cohorts                                       | No formal analysis                        |

Cohorts from single arm studies or cohorts representing one of the arms of an RCT. CUS = compression ultrasound. See Table S1 and S2 legends for expansion of other abbreviations.

**Table S8—[Sections 3.1-3.5] Methodology of Diagnostic Studies Assessing DD, PTP, and Proximal US for the Diagnosis of Suspected First Lower Extremity DVT: Individual Management Studies With Cohorts**

| Study Details                          |                                                                           | Methods<br>(Single-Arm Cohort vs Cohort From RCT)                                                                     |                      |                      |                                                                                         |                                                                                  |                                                                                                      |
|----------------------------------------|---------------------------------------------------------------------------|-----------------------------------------------------------------------------------------------------------------------|----------------------|----------------------|-----------------------------------------------------------------------------------------|----------------------------------------------------------------------------------|------------------------------------------------------------------------------------------------------|
| Study/Year                             | Patient Population                                                        | Diagnostic Test                                                                                                       | Outcome              | Consecutive Patients | Loss to Follow-up                                                                       | Received Alternative Tests                                                       | Comments                                                                                             |
| Billir et al <sup>32</sup> /2009       | Outpatients in primary care, overall prevalence 13%                       | Clinical decision rule including moderately sensitive DD                                                              | 3 mo symptomatic VTE | Invited              | 3 of 1,002                                                                              | No                                                                               | Negative assessment meant negative DD and $\leq 3$ points on 8-point scale (likely low-moderate PTP) |
| Kraijenhagen et al <sup>13</sup> /2002 | Patients referred to thrombosis center; prevalence 22%                    | Moderately sensitive DD and proximal US                                                                               | 3 mo symptomatic VTE | Yes                  | 17 of 1,756 excluded from analysis because DD not performed with knowledge of US result | No                                                                               | PTP assessed but only used in scenario analysis.                                                     |
| Bernardi et al <sup>33</sup> /1998     | University center, likely referred, overall prevalence 27.5%              | If normal US → highly sensitive DD                                                                                    | 3 mo symptomatic VTE | Yes                  | 2 of 686                                                                                | No                                                                               |                                                                                                      |
| Wells et al <sup>12</sup> /1997        | Outpatients, referral, overall prevalence 16%                             | Wells score, DD alone for low PTP, or with US (for moderate and high PTP)                                             | 3 mo symptomatic VTE | Yes                  | ?                                                                                       | No                                                                               | Low PTP and positive CUS was followed by venography. Negative CUS and high PTP led to venography     |
| Anderson et al <sup>17</sup> /2003     | ED patients, overall prevalence 18.1%                                     | Combination of Wells score, US, mixed highly sensitive and moderately sensitive DD                                    | 3 mo symptomatic VTE | Yes                  | ?                                                                                       | No                                                                               |                                                                                                      |
| Tick et al <sup>29</sup> /2002         | Outpatients referred to center by family doctor, overall prevalence 42.5% | Low PTP underwent CUS. Moderate to high PTP underwent US and if positive DD. If DD positive, US was repeated at day 8 | 3 mo symptomatic VTE | Yes                  | Not reported                                                                            | 2 patients were asymptomatic DVT diagnosed on CT scan performed for other reason |                                                                                                      |

(Continued)

**Table S8—Continued**

| Study/Year                             | Study Details                                        |                                                                                                                                                                                                                      |                      |                   | Methods<br>(Single-Arm Cohort vs Cohort From RCT) |                   |                                                                            | Received Alternative Tests | Comments |
|----------------------------------------|------------------------------------------------------|----------------------------------------------------------------------------------------------------------------------------------------------------------------------------------------------------------------------|----------------------|-------------------|---------------------------------------------------|-------------------|----------------------------------------------------------------------------|----------------------------|----------|
|                                        | Patient Population                                   | Diagnostic Test                                                                                                                                                                                                      | Outcome              | Methods           | Consecutive Patients                              | Loss to Follow-up | Alternative Tests                                                          |                            |          |
| Cogo et al <sup>14</sup> /1998         | Outpatients referred                                 | 2-Point US, with repeat                                                                                                                                                                                              | 6 mo symptomatic VTE | Single-arm cohort | Yes                                               | 0                 | No                                                                         |                            |          |
| Aguilar et al <sup>15</sup> /2002      | ED patients with moderate pretest probability        | If negative highly sensitive DD, no further testing                                                                                                                                                                  | 3 mo                 | Single-arm cohort | Yes                                               | ?                 | No                                                                         |                            |          |
| Bates et al <sup>15</sup> /2003        | Patients referred to thrombosis service              | Highly sensitive DD, if negative and low or moderate PTP, no further investigation                                                                                                                                   | 3 mo symptomatic VTE | Single-arm cohort | Yes                                               | 1 of 90           | No                                                                         |                            |          |
| Schutgens et al <sup>16</sup> /2003    | Referred to thrombosis service                       | Highly sensitive DD, if negative and low or moderate PTP, no further investigation                                                                                                                                   | 3 mo symptomatic VTE | Cohorts           | Yes                                               | 1 of 812          | No                                                                         |                            |          |
| Anderson et al <sup>10</sup> /1999     | ED patients                                          | Wells score and proximal US. If pretest low and US negative, no further testing. Patients with a moderate pretest and negative US and a repeat US in 1 wk. High PTP patients with a negative US underwent venography | 3 mo symptomatic VTE | Single-arm cohort | Yes                                               | 3 of 344          | Venogram if low pretest and positive US or if high pretest and negative US |                            |          |
| Ruiz-Gimenes et al <sup>16</sup> /2004 | ED patients                                          |                                                                                                                                                                                                                      | 3 mo symptomatic VTE | Single-arm cohort | Yes                                               | ?                 |                                                                            |                            |          |
| Oudega et al <sup>17</sup> /2005       | Primary care, overall prevalence 22%, 1,295 patients | Modified Wells score plus highly sensitive DD                                                                                                                                                                        | Serial US            | Single-arm cohort | Yes                                               | N/A               | No                                                                         |                            |          |

(Continued)



**Table S8—Continued**

| Study/Year                       | Study Details                                                                                                                        |                                                  |                      |                                                |                      | Received Alternative Tests | Comments |
|----------------------------------|--------------------------------------------------------------------------------------------------------------------------------------|--------------------------------------------------|----------------------|------------------------------------------------|----------------------|----------------------------|----------|
|                                  | Patient Population                                                                                                                   | Diagnostic Test                                  | Outcome              | Methods (Single-Arm Cohort vs Cohort From RCT) | Consecutive Patients |                            |          |
| Kearon et al <sup>38</sup> /2001 | Low pretest probability and negative moderate sensitivity DD. Referred to thrombosis service, pretest prevalence 14%, for low PTP 2% | Low pretest and negative moderately sensitive DD | 3 mo symptomatic VTE | Single-arm cohort                              | Yes                  | 0 of 177                   | No       |

Cohorts from single-arm studies or cohorts representing one of the arms of an RCT. See Table S1, S3, and S5 legends for expansion of abbreviations.

**Table S9—[Sections 3.1-3.5] Methodology of Diagnostic Studies Assessing DD, PTP, and Proximal US for the Diagnosis of Suspected First Lower Extremity DVT: Individual RCT With Direct Comparison of Diagnostic Strategies**

| Study/Year                        | Patient Population                                                                              | Study Details                                                                                                                                   |                                                                               |                      |                              |          |                                                              | Intention to Treat | Comments                                                         |
|-----------------------------------|-------------------------------------------------------------------------------------------------|-------------------------------------------------------------------------------------------------------------------------------------------------|-------------------------------------------------------------------------------|----------------------|------------------------------|----------|--------------------------------------------------------------|--------------------|------------------------------------------------------------------|
|                                   |                                                                                                 | Test 1/Strategy 1                                                                                                                               | Test 2/Strategy 2                                                             | Outcome              | Concealment of Randomization | Blinding | Follow-up                                                    |                    |                                                                  |
| Wells et al <sup>12</sup> /2003   | Outpatients (thrombosis units, ED), Wells score applied (unlikely or likely)                    | Pretest unlikely: DD with clinical follow-up if negative and US if positive<br>Pretest likely: US, if negative, DD and repeat US if DD positive | Unlikely: US with clinical follow-up if negative.<br>Likely: Serial US in all | 3 mo symptomatic VTE | Yes                          | N/A      | Strategy<br>1: 7 of 601 lost<br>Strategy<br>2: 7 of 495 lost | N/A                | Mixed DD: SimpliRED (moderately sensitive) and IL DD (sensitive) |
| Kearon et al <sup>139</sup> /2005 | Referral centers of 4 university hospitals, prevalence 7.5%, randomized after first negative US | Moderately sensitive DD with no testing if negative and venogram if positive                                                                    | Repeat US                                                                     | 3 mo symptomatic VTE | Yes                          | N/A      | 9 of 810 lost                                                | N/A                |                                                                  |

See Table 1 legend for expansion of abbreviation.

**Table S10—[Sections 3.1-3.5] Description and Results of Diagnostic Studies Assessing DD, PTP, and Proximal US for the Diagnosis of Suspected First Lower Extremity DVT: Results of Cross-sectional Accuracy and Cohort Management Studies**

| Question From Structured Clinical Question Table                                          | Study/Year                                                                   | Clinical Situation/Question | Meta-analysis vs Primary Study    | Meta-analysis if Cohort (Indicate From an RCT)                                    | Patient Population                            | Outcome Measure <sup>a</sup>             | Result                                                                                                                                                                                                                                                                                                                                                                                                                                                                                                                               | Comments                        |
|-------------------------------------------------------------------------------------------|------------------------------------------------------------------------------|-----------------------------|-----------------------------------|-----------------------------------------------------------------------------------|-----------------------------------------------|------------------------------------------|--------------------------------------------------------------------------------------------------------------------------------------------------------------------------------------------------------------------------------------------------------------------------------------------------------------------------------------------------------------------------------------------------------------------------------------------------------------------------------------------------------------------------------------|---------------------------------|
| What are the consequences of using US to diagnose proximal DVT?                           | Goodacre et al <sup>12</sup> /2005                                           | Suspected DVT               | Meta-analysis                     | Accuracy                                                                          | Mixed                                         | Sensitivity/specificity                  | Estimates of sensitivity and specificity differ only slightly among different US techniques. Sensitivity for detection of proximal DVT from 93.8% for CUS (95% CI, 92%-95.3%) to 96.5% for duplex US (95% CI, 95.1%-97.6%). Specificity of CUS was 97.8% (95% CI, 97%-98.4%), numerically slightly higher than for duplex (94%; 95% CI, 92.8%-95.1%) or triplex US (94.3%; 95% CI, 92.5-95.8).                                                                                                                                       |                                 |
|                                                                                           | Wells et al <sup>12</sup> /1997                                              | Low pretest and positive US | Primary                           | Cohort                                                                            | 3% prevalence                                 | Post-TP (reference standard: venography) | 9 of 11, 82% (48-98)                                                                                                                                                                                                                                                                                                                                                                                                                                                                                                                 |                                 |
|                                                                                           | Anderson et al <sup>10</sup> /1999                                           | Low pretest and positive US | Primary                           | Cohort                                                                            | 3.2% prevalence                               | Post-TP (reference standard: venography) | 5 of 5 (100%, proximal)                                                                                                                                                                                                                                                                                                                                                                                                                                                                                                              |                                 |
|                                                                                           | Model Goodacre et al <sup>12</sup> /2005; Jaeschke et al <sup>10</sup> /2009 |                             | Meta-analysis of accuracy studies |                                                                                   |                                               |                                          | Assuming sensitivity of 94% and specificity of 98% for US:<br>5% PTP negative post-TP positive 71% (lower 95% CI, 63), negative 0.3 (0.4%)<br>10% PTP negative post-TP positive 84% (77%); negative 0.7% (0.9%)<br>13% PTP negative post-TP positive 88% (lower 95% CI, 82), negative 0.9 (1.2%)<br>20% PTP negative post-TP positive 92% (87%); negative 1.5% (1.3%-2%)<br>38% PTP negative post-TP positive 97% (lower 95% CI, 95), negative 4.8 (lower 3%)<br>50% PTP negative post-TP positive 98% (98%); negative 8% (lower 5%) |                                 |
| What are the consequences of using PTP with a single negative proximal US to exclude DVT? | Tick et al <sup>12</sup> /2002                                               | Low pretest and negative US | Primary                           | Management                                                                        | Outpatients (prevalence in low pretest = 11%) | 3 mo follow-up                           | 5 of 250, 2%                                                                                                                                                                                                                                                                                                                                                                                                                                                                                                                         | Prevalence in low pretest = 11% |
|                                                                                           | Wells et al <sup>12</sup> /1997                                              | Low pretest and negative US | Primary                           | Management                                                                        | 3% prevalence                                 | 3 mo follow-up                           | 1 of 320, (0.3%)                                                                                                                                                                                                                                                                                                                                                                                                                                                                                                                     |                                 |
|                                                                                           | Kraaijenhagen et al <sup>13</sup> /2002                                      | Low pretest and negative US | Primary                           | Management according to US and DD; results according to PTP via scenario analysis | 6.9% prevalence                               | 3 mo follow-up                           | 13 of 834, 1.6%                                                                                                                                                                                                                                                                                                                                                                                                                                                                                                                      | Scenario analysis               |

(Continued)

**Table S10—Continued**

| Question From Structured Clinical Question Table                                                             | Study/Year                                | Clinical Situation/<br>Question                     | Meta-analysis<br>vs Primary Study | Accuracy<br>vs Management<br>Cohort (Indicate<br>if Cohort[s] is<br>From an RCT) | Patient Population          | Outcome Measure <sup>a</sup> | Result                                                                         | Comments                                                                                       |
|--------------------------------------------------------------------------------------------------------------|-------------------------------------------|-----------------------------------------------------|-----------------------------------|----------------------------------------------------------------------------------|-----------------------------|------------------------------|--------------------------------------------------------------------------------|------------------------------------------------------------------------------------------------|
|                                                                                                              | Anderson<br>et al <sup>19</sup> /1999     | Low pretest and<br>negative US                      | Primary                           | Management                                                                       | 3.2% prevalence             | 3 mo follow-up               | 1 of 185<br>(calf DVT)                                                         |                                                                                                |
|                                                                                                              | Wells et al <sup>21</sup> /2003           | Unlikely Wells<br>score and<br>negative US          | Primary                           | Management,<br>RCT                                                               | 4.4% prevalence             | 3 mo follow-up               | 4 of 272, 1.4%<br>(0.4-3.8%)                                                   |                                                                                                |
|                                                                                                              | Anderson<br>et al <sup>19</sup> /1999     | Moderate pretest<br>and negative<br>US              | Primary                           | Management                                                                       | 13 of 105 initial<br>US     | 3 mo follow-up               | 2 of 92 (1 at 1 wk<br>US, 1 calf<br>during follow-up)<br>2.2%                  |                                                                                                |
|                                                                                                              | Wells et al <sup>21</sup> /1997           | Moderate pretest<br>and negative<br>US              | Primary                           | Management                                                                       | 16.6% prevalence            | 3 mo follow-up               | 5 of 166 (3 at 1 wk<br>and 2 during<br>follow-up) 3.0%                         |                                                                                                |
|                                                                                                              | Tick et al <sup>20</sup> /2002            | Moderate-high<br>pretest and<br>negative US         | Primary                           | Cohort                                                                           | 56.5% on initial<br>US      | 3 mo follow-up               | Would miss 13<br>of 231 5.6%                                                   | Second US performed<br>due to positive<br>SimpliRED DD<br>detected 13 of 15,<br>2 still missed |
|                                                                                                              | Wells et al <sup>21</sup> /2003           | Likely Wells<br>score and<br>negative US            | Primary                           | Cohort from<br>RCT                                                               | 27.4% prevalence            | 3 mo follow-up               | 1 of 182 on 1 wk<br>repeat, 2<br>during follow-up;<br>total = 3 of<br>182 1.6% |                                                                                                |
|                                                                                                              | Wells et al <sup>21</sup> /1997           | High pretest and<br>negative US                     | Primary                           | Single cohort                                                                    | 75% prevalence              | 3 mo follow-up               | 4 of 22, 18.2%                                                                 |                                                                                                |
|                                                                                                              | Anderson<br>et al <sup>19</sup> /1999     | High pretest and<br>negative US                     | Primary                           | Single cohort                                                                    | 20 of 49 on<br>original CUS | Venography                   | 4 of 29<br>(2 proximal,<br>2 calf) = 13.2%                                     |                                                                                                |
|                                                                                                              | Ruiz-Gimenez<br>et al <sup>18</sup> /2004 | High pretest and<br>negative US                     | Primary                           | Cohort                                                                           | 49% prevalence              | Repeat US                    | 5 of 62 8.1%                                                                   | 4 detected on repeat<br>US                                                                     |
| What are the<br>consequences of using<br>serial proximal US to<br>exclude DVT<br>(regardless of<br>pretest)? | Righini<br>et al <sup>21</sup> /2008      | Prevalence of<br>16%-28% in<br>different<br>studies | Meta-analysis                     | 6 studies, 1<br>looked at<br>single US                                           | Mixed                       | 3 mo follow-up               | 0.6% (0.4-0.9%)                                                                |                                                                                                |

(Continued)

**Table S10—Continued**

| Question From Structured Clinical Question Table                                                           | Study/Year                                | Clinical Situation/<br>Question                                     | Meta-analysis<br>vs Primary Study | Accuracy<br>vs Management<br>Cohort (Indicate<br>if Cohort[s] is<br>From an RCT) | Patient Population                         | Outcome Measure <sup>a</sup> | Result                                                                                           | Comments                                                                                                                                                                                                             |
|------------------------------------------------------------------------------------------------------------|-------------------------------------------|---------------------------------------------------------------------|-----------------------------------|----------------------------------------------------------------------------------|--------------------------------------------|------------------------------|--------------------------------------------------------------------------------------------------|----------------------------------------------------------------------------------------------------------------------------------------------------------------------------------------------------------------------|
|                                                                                                            | Wells et al <sup>12</sup> /1997           | Moderate pretest,<br>negative serial<br>(2) proximal US             | Primary                           | Management                                                                       | Outpatients,<br>16% prevalence             | 3 mo follow-up               | 2 of 163 (1.2%)                                                                                  | Included in Righini<br>et al <sup>31</sup> meta-analysis                                                                                                                                                             |
|                                                                                                            | Anderson<br>et al <sup>13</sup> /1999     | Moderate pretest,<br>negative serial<br>(2) proximal US             | Primary                           | Management                                                                       | Outpatients, ED,<br>14.3%<br>prevalence    | 3 mo follow-up               | 1 of 91 (3.2%)                                                                                   |                                                                                                                                                                                                                      |
|                                                                                                            | Kearon<br>et al <sup>19</sup> /2005       | 7.5% Prevalence                                                     | Primary                           | Management,<br>cohort from<br>RCT                                                | 3 of 350 detected<br>on repeat US          | 6 mo follow-up               | 2 of 347 (0.6%)                                                                                  |                                                                                                                                                                                                                      |
|                                                                                                            | Wells<br>et al <sup>12</sup> /2003        | Likely Wells<br>score plus<br>serial (2)<br>negative<br>proximal US | Primary                           | Management,<br>RCT cohort                                                        | 27.4% prevalence                           | 3 mo follow-up               | 2 of 181 (1.1%)                                                                                  |                                                                                                                                                                                                                      |
|                                                                                                            | Cogo<br>et al <sup>13</sup> /1998         | 24% Pretest, 2<br>negative<br>proximal US                           | Primary                           | Management                                                                       | 24% prevalence                             | 3 mo follow-up               | 8 of 1301 (0.6%)                                                                                 | Included in Righini<br>et al <sup>31</sup> meta-analysis                                                                                                                                                             |
|                                                                                                            | Ruiz-Gimenes<br>et al <sup>18</sup> /2004 | Overall<br>prevalence<br>22.6%                                      | Primary                           | Management                                                                       | 44.6% among<br>high pretest                | 3 mo follow-up               | 0 of 41                                                                                          |                                                                                                                                                                                                                      |
| What are the<br>consequences of<br>using a highly sensitive DD<br>as a stand-alone<br>test to exclude DVT? | Geersing<br>et al <sup>24</sup> /2009     | Suspected DVT,<br>point of care<br>testing                          | Meta-analysis                     | Accuracy and<br>management<br>studies<br>included                                | ED or office or<br>home (point of<br>care) | Sensitivity/specificity      | Highest<br>sensitivity of<br>96% and 93%,<br>within the<br>range of<br>previous<br>meta-analysis | Results for moderately<br>sensitive tests: 85%;<br>95% CI, 62%–74%<br>(within range of<br>Goadaere et al <sup>25</sup><br>2005 meta-analysis);<br>for 50% pretest, 18%<br>posttest; for 5%<br>pretest, 1.1% posttest |
|                                                                                                            | Goadaere<br>et al <sup>25</sup> /2005     | Suspected DVT                                                       | Meta-analysis                     | Accuracy studies                                                                 | Mixed                                      | Sensitivity/specificity      | Highest<br>sensitivity 94%                                                                       | For moderately<br>sensitive assays,<br>sensitivity 85%–87%                                                                                                                                                           |
|                                                                                                            | Stein et al <sup>27</sup> /2004           | Suspected DVT                                                       | Meta-analysis                     | Prospective<br>accuracy                                                          |                                            | Sensitivity/specificity      | Highest<br>sensitivity for<br>ELISA 96%<br>(95% CI,<br>91%–100%)                                 | Authors claim as good<br>as US (but serial US<br>needed if PTP high)                                                                                                                                                 |

(Continued)

**Table S10—Continued**

| Question From Structured Clinical Question Table                       | Study/Year                            | Clinical Situation/<br>Question                           | Meta-analysis<br>vs Primary Study | Accuracy<br>vs Management<br>Cohort (Indicate<br>if Cohort[s] is<br>From an RCT) | Patient Population                                                                     | Outcome Measure <sup>a</sup> | Result                                                                                                                                                                                                                                                         | Comments                                                                                                                                                         |
|------------------------------------------------------------------------|---------------------------------------|-----------------------------------------------------------|-----------------------------------|----------------------------------------------------------------------------------|----------------------------------------------------------------------------------------|------------------------------|----------------------------------------------------------------------------------------------------------------------------------------------------------------------------------------------------------------------------------------------------------------|------------------------------------------------------------------------------------------------------------------------------------------------------------------|
|                                                                        | Di Nisio<br>et al <sup>26</sup> /2007 | Suspected DVT                                             | Meta-analysis                     | Prospective<br>accuracy                                                          | Mixed                                                                                  | Sensitivity/specificity      | Range consistent<br>with other<br>meta-analyses;<br>highest<br>sensitivity<br>of 97%                                                                                                                                                                           | Assuming 50%<br>prevalence (high<br>pretest) and 50%<br>specificity, the test<br>would miss 15 of 500<br>cases, and posttest<br>negative is 15 of<br>265 or 0.6% |
|                                                                        | Fancher<br>et al <sup>28</sup> /2004  | Suspected DVT                                             | Meta-analysis                     | Accuracy and<br>management<br>studies                                            | Mixed                                                                                  | Sensitivity/specificity      | Overall sensitivity<br>98% (95% CI,<br>96%-99%),<br>specificity<br>46% (95%<br>CI, 28%-67%)<br><br>If pretest 5%<br>→ posttest 0.3%<br><br>If pretest 10%<br>→ posttest 0.6%<br><br>If pretest 20%<br>→ posttest 1.2%<br><br>If pretest 30%<br>→ posttest 2.1% |                                                                                                                                                                  |
| What are the<br>consequences of<br>using PTP and DD<br>to exclude DVT? | Fancher<br>et al <sup>28</sup> /2004  | Low pretest and<br>negative<br>moderately<br>sensitive DD | Meta-analysis                     | Cohorts from<br>management<br>and accuracy<br>studies                            | Frequency of DVT<br>at presentation,<br>10.1%-43.2%                                    | 3 mo follow-up               | 0.5% (95% CI,<br>0.1%-1.1%)                                                                                                                                                                                                                                    | Likely includes people<br>with previous DVT                                                                                                                      |
|                                                                        | Kearon<br>et al <sup>29</sup> /2001   | Low pretest and<br>negative<br>moderately<br>sensitive DD | Primary                           | Management                                                                       | Referred to<br>thrombosis<br>service, pretest<br>prevalence 14%,<br>for low pretest 2% | 3 mo follow-up               | 1 of 171<br>(0.6%; 95% CI,<br>0-2.9%)                                                                                                                                                                                                                          | Included in Fancher<br>et al <sup>28</sup> meta-analysis                                                                                                         |
|                                                                        | Wells<br>et al <sup>30</sup> /2006    | Low pretest and<br>negative<br>moderately<br>sensitive DD | Meta-analysis                     | Cohorts from<br>management<br>and accuracy<br>studies                            | 5% prevalence                                                                          | 3 mo follow-up               | 0.9% LR<br>negative, 0.20<br>(0.12-0.31)                                                                                                                                                                                                                       |                                                                                                                                                                  |

(Continued)

**Table S10—Continued**

| Question From Structured Clinical Question Table | Study/Year                            | Clinical Situation/Question                                                                | Meta-analysis vs Primary Study | Accuracy vs Management Cohort (Indicate if Cohort[s] is From an RCT) | Patient Population                             | Outcome Measure <sup>a</sup> | Result                                                                    | Comments                                                                             |
|--------------------------------------------------|---------------------------------------|--------------------------------------------------------------------------------------------|--------------------------------|----------------------------------------------------------------------|------------------------------------------------|------------------------------|---------------------------------------------------------------------------|--------------------------------------------------------------------------------------|
|                                                  | Geersing et al <sup>24</sup> /2009    | Low PTP and negative moderately sensitive DD                                               | Meta-analysis                  | Cohorts from management and accuracy studies                         | ED patients, overall prevalence 3.7%           | Posttest calculated          | SimpliRED: 1.1% (95% CI, 0.8%-1.5%); Clearview Simplify: 1.1% (0.9%-1.5%) | Calculated assuming 5% pretest                                                       |
|                                                  | Anderson et al <sup>17</sup> /2003    | Low pretest and negative DD                                                                | Primary                        | Management                                                           | ED patients, overall prevalence 3.7%           | 3 mo follow-up               | 3 of 316 (0.95%)                                                          | Mixed DD; SimpliRED and IL DD; included in Fancher et al <sup>20</sup> meta-analysis |
|                                                  | Subramanian et al <sup>18</sup> /2006 | Low Hamilton score and negative moderately sensitive DD                                    | Primary                        | Accuracy with 3-mo follow-up                                         | ED                                             | 3 mo follow-up               | 1 of 103 (1.0%) by low Hamilton, 1 of 81 (1.2%) by low Wells              | Calf thrombosis                                                                      |
|                                                  | Biller et al <sup>12</sup> /2009      | Primary care, lower score on unique prediction rule, and negative moderately sensitive DD. | Primary                        | Management                                                           | Outpatients, primary practice, prevalence 13%  | 3 mo follow-up               | 7 of 500, 1.4% (95% CI, 0.6%-2.9%)                                        | Two-level CDR incorporating negative SimpliRED DD and unique prediction rule         |
|                                                  | Wells et al <sup>21</sup> /2003       | Unlikely Wells score and negative moderately sensitive DD                                  | Primary                        | Cohort from RCT                                                      | Outpatients, primary practice, prevalence 4.4% | 3 mo follow-up               | 2 of 218, 0.9% (95% CI, 0.1%-3.3%)                                        |                                                                                      |
|                                                  | Fancher et al <sup>20</sup> /2004     | Moderate pretest and negative moderately sensitive DD                                      | Meta-analysis                  | Cohorts from management and accuracy studies                         | Frequency of DVT at presentation, 10.1%-43.2%  | 3 mo follow-up               | 3.5% (95% CI, 1.4%-6.9%)                                                  |                                                                                      |
|                                                  | Wells et al <sup>19</sup> /2006       | Moderate pretest and negative moderately sensitive DD                                      | Meta-analysis                  | Cohorts from management and accuracy studies                         | Frequency of DVT at presentation, 17%          | 3 mo follow-up               | 4.4% LR negative 0.23 (0.13-0.39)                                         |                                                                                      |

(Continued)

**Table S10—Continued**

| Question From Structured Clinical Question Table | Study/Year                            | Clinical Situation/<br>Question                                                            | Meta-analysis<br>vs Primary Study | Accuracy<br>vs Management<br>Cohort (Indicate<br>if Cohort[s] is<br>From an RCT) | Patient Population                                   | Outcome Measure <sup>a</sup>                                                        | Result                                                                                    | Comments                           |
|--------------------------------------------------|---------------------------------------|--------------------------------------------------------------------------------------------|-----------------------------------|----------------------------------------------------------------------------------|------------------------------------------------------|-------------------------------------------------------------------------------------|-------------------------------------------------------------------------------------------|------------------------------------|
|                                                  | Geersing<br>et al <sup>24</sup> /2009 | Moderate pretest<br>and negative<br>moderately<br>sensitive DD,<br>point of care           | Meta-analysis                     | Cohorts from<br>management<br>and accuracy<br>studies                            | Approximately<br>26% prevalence                      | Posttest calculated                                                                 | SimpliRED:<br>4.9% (95% CI,<br>3.6%-6.8%)<br>or Clearview<br>Simplify 5.2%<br>(4.1%-6.5%) | Calculated assuming<br>20% pretest |
|                                                  | Büller<br>et al <sup>25</sup> /2009   | Higher score on<br>unique<br>prediction rule<br>and negative<br>moderately<br>sensitive DD | Primary                           | Cohort                                                                           | Approximately<br>26% prevalence                      | Positive or negative<br>US                                                          | 12 of 63, 19%                                                                             |                                    |
|                                                  | Fancher<br>et al <sup>26</sup> /2004  | High pretest and<br>negative<br>moderately<br>sensitive DD                                 | Meta-analysis                     | Cohorts from<br>management<br>and accuracy<br>studies                            | Frequency of DVT<br>at presentation,n<br>10.1%-43.2% | 3 mo follow-up                                                                      | 21.4% (95% CI,<br>8.5%-37.9%)                                                             |                                    |
|                                                  | Wells<br>et al <sup>27</sup> /2006    | High pretest and<br>negative<br>moderately<br>sensitive DD                                 | Meta-analysis                     | Cohorts from<br>management<br>and accuracy<br>studies                            | Frequency of DVT<br>at presentation,<br>53%          | 3 mo follow-up                                                                      | 19% LR<br>negative 0.20<br>(0.10-0.38)                                                    |                                    |
|                                                  | Geersing<br>et al <sup>27</sup> /2009 | High pretest<br>and negative<br>moderately<br>sensitive DD                                 | Meta-analysis                     | Cohorts from<br>management<br>and accuracy<br>studies                            | Posttest calculated                                  | > 10 for lower<br>end of CI                                                         | Calculated assuming<br>50% pretest                                                        |                                    |
|                                                  | Wells et al <sup>28</sup> /2006       | Low pretest and<br>negative highly<br>sensitive DD                                         | Meta-analysis                     | Cohorts from<br>management<br>and accuracy<br>studies                            | Frequency of DVT<br>at presentation,<br>10.1%-43.2%  | 3 mo follow-up                                                                      | NPV, 99 (97-100);<br>LR negative,<br>0.1 (0.03-0.37);<br>estimated<br>posttest 0.5%       | Low only                           |
|                                                  | Geersing<br>et al <sup>29</sup> /2009 | Low pretest and<br>negative highly<br>sensitive DD,<br>point of care                       | Meta-analysis                     | Cohorts from<br>management<br>and accuracy<br>studies                            | Post-TP calculated                                   | Cardiac: 0.4%<br>(95% CI,<br>0.2%-0.8%)<br>or Triage:<br>0.9 (95% CI,<br>0.4%-2.2%) | Calculated assuming<br>5% pretest                                                         |                                    |

(Continued)



**Table S10—Continued**

| Question From Structured Clinical Question Table | Study/Year                          | Clinical Situation/Question                                      | Meta-analysis vs Primary Study                  | Accuracy vs Management Cohort (Indicate if Cohort[s] is From an RCT) | Patient Population                           | Outcome Measure <sup>a</sup>                                          | Result                                                                            | Comments |
|--------------------------------------------------|-------------------------------------|------------------------------------------------------------------|-------------------------------------------------|----------------------------------------------------------------------|----------------------------------------------|-----------------------------------------------------------------------|-----------------------------------------------------------------------------------|----------|
|                                                  | Oudega et al <sup>17</sup> /2005    | Lowest pretest and negative highly sensitive DD                  | Single cohort (repeat US as reference standard) | Accuracy                                                             | 12% Prevalence                               | Posttest on repeat CUS                                                | 5 of 222, 2.3%                                                                    |          |
|                                                  | Fancher et al <sup>29</sup> /2004   | Low and moderate pretest; highly sensitive DD                    | Meta-analysis                                   | Cohorts from management and accuracy studies                         | Frequency of DVT at presentation 10.1%-43.2% | 3 mo follow-up                                                        | 0.4% (95% CI, 0.04%-1.1%)                                                         |          |
|                                                  | Wells et al <sup>30</sup> /2006     | Moderate pretest and negative highly sensitive DD                | Meta-analysis                                   | Cohorts from management and accuracy                                 | 17% Prevalence                               | 3 mo follow-up                                                        | NPV, 99% (95% CI, 96%-100%); LR negative, 0.05 (0.01-0.21); estimated posttest 1% |          |
|                                                  | Aguilar et al <sup>35</sup> /2002   | Moderate pretest and negative highly sensitive DD                | Primary                                         | Cohort of moderate pretest, accuracy                                 | 19.4% Prevalence                             | 3 mo follow-up also performed                                         | 0 of 35                                                                           |          |
|                                                  | Bates et al <sup>37</sup> /2003     | Moderate pretest and negative highly sensitive DD                | Primary                                         | Cohort                                                               | 9.0% Prevalence                              | 3 mo follow-up                                                        | 1 of 90, 1.1%                                                                     |          |
|                                                  | Schutgens et al <sup>36</sup> /2003 | Moderate pretest and negative sensitive DD                       | Primary                                         | Cohort                                                               | 37.7% Prevalence                             | 3 mo follow-up                                                        | 0 of 89                                                                           |          |
|                                                  | Geersing et al <sup>24</sup> /2009  | Moderate pretest and negative highly sensitive DD, point of care | Meta-analysis                                   | Cohorts from management and accuracy studies                         | Posttest calculated                          | Cardiac: 1.7% (95% CI, 1.0%-3.8%) or Triage: 4.3% (95% CI, 2.0%-9.7%) | Calculated assuming 20% pretest                                                   |          |
|                                                  | Fancher et al <sup>28</sup> /2004   | High pretest and negative highly sensitive DD                    | Meta-analysis                                   | Cohorts from management and accuracy studies                         | Frequency of DVT at presentation 10.1%-43.2% | 3 mo follow-up                                                        | 6.4% (95% CI, 1.7%-14.5%)                                                         |          |

(Continued)

**Table S10—Continued**

| Question From Structured Clinical Question Table                                                                                        | Study/Year                         | Clinical Situation/<br>Question                                                           | Meta-analysis/<br>vs Primary Study | Meta-analysis if Cohort[s] is From an RCT                            | Patient Population                                       | Outcome Measure <sup>a</sup> | Result                                                                                    | Comments                                                                        |
|-----------------------------------------------------------------------------------------------------------------------------------------|------------------------------------|-------------------------------------------------------------------------------------------|------------------------------------|----------------------------------------------------------------------|----------------------------------------------------------|------------------------------|-------------------------------------------------------------------------------------------|---------------------------------------------------------------------------------|
|                                                                                                                                         |                                    |                                                                                           |                                    | Accuracy vs Management Cohort (Indicate if Cohort[s] is From an RCT) |                                                          |                              |                                                                                           |                                                                                 |
|                                                                                                                                         | Wells et al <sup>20</sup> /2006    | High pretest and negative highly sensitive DD                                             | Meta-analysis                      | Cohorts from management and accuracy studies                         | Frequency of DVT at presentation 53%                     | 3 mo follow-up               | NPV 92% (95% CI, 81%-97%); LR negative, 0.07 (95% CI, 0.03-0.18); estimated posttest 8.6% | Calculated assuming 50% pretest                                                 |
|                                                                                                                                         | Geersing et al <sup>21</sup> /2009 | High PTP and negative highly sensitive DD, point of care                                  | Meta-analysis                      | Cohorts from management and accuracy studies                         |                                                          | Posttest calculated          | Cardiac: 6.5% (95% CI, 3.8%-13.7%) or Triage: 15.3% (95% CI, 7.4%-30.1%)                  |                                                                                 |
| What are the consequences of using single proximal US to rule out DVT among those with low pretest and positive moderately sensitive DD | Anderson et al <sup>17</sup> /2003 | ED, low pretest, positive DD, negative US                                                 | Primary                            | ED cohort                                                            | ED, 18.1% overall, low pretest, prevalence 3.8% to start | Posttest                     | 0 of 113, 0%                                                                              | Mixed DD: SimpliRED and IL DD; both events confined to calf veins               |
|                                                                                                                                         | Wells et al <sup>21</sup> /2003    | Unlikely Wells score and positive DD and negative US                                      | Primary                            | Cohort (from RCT)                                                    | Outpatients, prevalence 4.4%                             | Posttest                     | 0 of 85                                                                                   | Mixed DD: SimpliRED and IL DD                                                   |
| What are the consequences of using US to rule out DVT among those with moderate pretest and positive moderately sensitive DD?           | Tiek et al <sup>20</sup> /2002     | Negative US and positive moderately sensitive DD and combination of moderate-high pretest | Primary                            | Cohort management                                                    | 11% Prevalence                                           | Posttest                     | 15 of 83, 18.1% (95% CI, 10.5%-28.1%)                                                     | 18.1% in mixed moderate to high. Unable to determine results for moderate alone |

(Continued)

**Table S10—Continued**

| Question From Structured Clinical Question Table                                                                                                                              | Study/Year                          | Clinical Situation/<br>Question                                               | Accuracy vs Management Cohort (Indicate if Cohort[s] is From an RCT) |                   |                                       | Outcome Measure <sup>a</sup> | Result                              | Comments                                                                                                  |
|-------------------------------------------------------------------------------------------------------------------------------------------------------------------------------|-------------------------------------|-------------------------------------------------------------------------------|----------------------------------------------------------------------|-------------------|---------------------------------------|------------------------------|-------------------------------------|-----------------------------------------------------------------------------------------------------------|
|                                                                                                                                                                               |                                     |                                                                               | Meta-analysis vs Primary Study                                       | Cohort            | Patient Population                    |                              |                                     |                                                                                                           |
| What are the consequences of using US to rule out DVT among those with moderate pretest and a positive highly sensitive DD?                                                   | Aguilar et al <sup>15</sup> /2002   | Moderate PTP and positive sensitive DD, followed by negative proximal US      | Primary                                                              | Cohort management | Referral to ED, 19.4%                 | 3 mo follow-up               | 0 of 73, 0%                         | Highly sensitive DD                                                                                       |
| What are the consequences of using serial proximal US to exclude DVT in patients with a positive DD?                                                                          | Tick et al <sup>20</sup> /2002      | Moderate to high pretest, positive moderately sensitive DD, first US negative | Primary                                                              | Management        | Referral practice, 56.5% prevalence   | 3 mo follow-up               | 2 of 64 missed on second US (3.1%)  | Overall 15 of 83 with abnormal SimpliRED DD had VTE (18%), 13 detected on second US, 2 of 64 missed, 3.1% |
|                                                                                                                                                                               | Bernardi et al <sup>13</sup> /1998  | PTP not specified; positive highly sensitive DD and first US negative         | Primary                                                              | Management        | University practice, 27.5% prevalence | 3 mo follow-up               | 2 of 83 missed on second US (2.4%)  | Overall 7 of 88 (8%) had VTE, 5 detected on repeat US at 1 wk                                             |
|                                                                                                                                                                               | Schutgens et al <sup>16</sup> /2003 | Irrespective of pretest, positive highly sensitive DD, first US negative      | Primary                                                              | Management        | Referral practice, 39% prevalence     | 3 mo follow-up               | 6 of 291 missed on second US (2.1%) |                                                                                                           |
| What are the consequences of using a negative DD to obviate the need for serial testing in patients with a negative proximal US and moderate or high pretest at presentation? | Tick et al <sup>20</sup> /2002      | Moderate to high pretest, negative US, negative moderately sensitive DD       | Primary                                                              | Management        | 56.5% prevalence                      | 3 mo follow-up               | 0 of 148                            |                                                                                                           |

(Continued)

**Table S10—Continued**

| Question From Structured Clinical Question Table | Study/Year                                | Clinical Situation/<br>Question                                                                                                                     | Meta-analysis<br>vs Primary Study | Accuracy<br>vs Management<br>Cohort (Indicate<br>if Cohort[s] is<br>From an RCT) | Patient Population | Outcome Measure <sup>a</sup> | Result                                    | Comments                            |
|--------------------------------------------------|-------------------------------------------|-----------------------------------------------------------------------------------------------------------------------------------------------------|-----------------------------------|----------------------------------------------------------------------------------|--------------------|------------------------------|-------------------------------------------|-------------------------------------|
|                                                  | Kraaijenagen<br>et al <sup>13</sup> /2002 | 22% Original<br>prevalence                                                                                                                          | Primary                           | Accuracy plus<br>follow-up                                                       | 22% prevalence     | 3 mo follow-up               | 6 of 828, 0.7%;<br>(95% CI,<br>0.3%–1.6%) |                                     |
|                                                  | Kearon<br>et al <sup>19</sup> /2005       | No pretest<br>established,<br>but 7.5%<br>prevalence,<br>likely low to<br>moderate and<br>negative US<br>and negative<br>moderately<br>sensitive DD | Primary                           | Management                                                                       | 7.5%               | Posttest, 6 mo<br>follow-up  | 3 of 309, 1%                              |                                     |
|                                                  | Anderson<br>et al <sup>17</sup> /2003     | Moderate pretest,<br>negative US,<br>negative DD<br>(mixed)                                                                                         | Primary                           | Management                                                                       | 18.1% prevalence   | 33 mo follow-up              | 0 of 244                                  | Mixed DD:<br>SimpliRED<br>and IL DD |
|                                                  | Wells<br>et al <sup>21</sup> /2003        | Likely Wells<br>score,<br>negative US,<br>negative DD                                                                                               | Primary                           | Management<br>cohort from RCT                                                    | 27.3% prevalence   | 3 mo follow-up               | 0 of 81                                   | Mixed DD:<br>SimpliRED<br>and IL DD |
|                                                  | Schutgens<br>et al <sup>16</sup> /2003    | Consecutive<br>referred, high<br>pretest plus<br>negative highly<br>sensitive DD<br>and<br>negative US                                              | Primary                           | Management                                                                       | At least 39%       | Posttest                     | 1 of 37, 2.7%                             |                                     |
|                                                  | Bates<br>et al <sup>15</sup> /2003        | Consecutive<br>outpatients, high<br>pretest, negative<br>highly sensitive<br>DD and negative<br>US                                                  | Primary                           | Management                                                                       | 29.6%              | Posttest                     | 0 of 20                                   |                                     |

CDR = clinical decision rule; LR = likelihood ratio. See Tables S1–S3 legends for expansion of abbreviations.

<sup>a</sup>eg, Post-TP during 3-mo follow-up sensitivity or specificity, and so forth.

**Table S11—[Sections 3.1-3.5] Evidence Profiles for Diagnostic Studies Assessing DD, PTP, and Proximal US for the Diagnosis of Suspected First Lower Extremity DVT: Among Patients With Low PTP, What Is the 3-mo Post-TP of VTE Following Exclusion of DVT With a Given Diagnostic Strategy?**

| No. of Studies  | Quality Assessment              |             |               |                                                                        |                                             |                                              |                                                 |                  |              |                                                                 | Summary of Findings |                      |  |  |
|-----------------|---------------------------------|-------------|---------------|------------------------------------------------------------------------|---------------------------------------------|----------------------------------------------|-------------------------------------------------|------------------|--------------|-----------------------------------------------------------------|---------------------|----------------------|--|--|
|                 | Design                          | Limitations | Inconsistency | Indirectness                                                           | Imprecision                                 | Other Considerations                         | No. of Patients                                 |                  | Effect       |                                                                 | Quality             |                      |  |  |
|                 |                                 |             |               |                                                                        |                                             |                                              | Starting Strategy/ For Follow-up After Strategy | Negative for DVT | Control Risk | Relative                                                        |                     | Absolute, % (95% CI) |  |  |
| 3 meta-analyses | Management and accuracy studies | ...         | ...           | Some (-1) (calculated in one meta-analysis; accuracy studies included) | ...                                         | Low PTP and negative moderately sensitive DD | ...                                             | Assumed 0        | N/A          | 0.5 (0.07-1.1), 0.9 (LR, 0.2; 95% CI, 0.12-0.31), 1.1 (0.8-1.5) | Moderate            |                      |  |  |
| 5               | Management                      | ...         | ...           | Low PTP and negative highly sensitive DD                               | ...                                         | ...                                          | 1,270/824                                       | Assumed 0        | N/A          | 1.0 (0.5-1.7)                                                   | High                |                      |  |  |
| 3 meta-analyses | Management and accuracy studies | ...         | ...           | Some (-1), includes accuracy studies                                   | Upper limit of CI in one meta-analysis > 2% | ...                                          | ...                                             | Assumed 0        | N/A          | 0.4 (0.04-1.1), 0.4 (0.2-0.8); 0.9 (0.4-2.2)                    | Moderate            |                      |  |  |

(Continued)

**Table S11—Continued**

| Quality Assessment |                    | Summary of Findings |               |                                                                                           |             |                                                                     |                                                       |              |          |                         |         |
|--------------------|--------------------|---------------------|---------------|-------------------------------------------------------------------------------------------|-------------|---------------------------------------------------------------------|-------------------------------------------------------|--------------|----------|-------------------------|---------|
| No. of Studies     | Design             | Limitations         | Inconsistency | Indirectness                                                                              | Imprecision | Other Considerations                                                | No. of Patients                                       |              | Effect   |                         | Quality |
|                    |                    |                     |               |                                                                                           |             |                                                                     | Starting Strategy/<br>For Follow-up<br>After Strategy | Control Risk | Relative | Absolute, %<br>(95% CI) |         |
| 4                  | Management cohorts | ...                 | ...           | Some were calf vein thrombosis                                                            | ...         | ...                                                                 | 944/885                                               | Assumed 0    | N/A      | 0.9 (0.5-1.6)           | High    |
| 2                  | Management cohorts | ...                 | ...           | Low PTP and positive DD (moderately or highly sensitive) followed by negative proximal US | ...         | Mixed DD tests; number of patients tested with each assay not clear | 765/198                                               | Assumed 0    | N/A      | 0 (0-1.5)               | High    |

Bibliography: Wells PS, Anderson DR, Rodger M, et al. Evaluation of D-dimer in the diagnosis of suspected deep-vein thrombosis. *N Engl J Med.* 2003;349(13):1227-1235. Geersing GJ, Janssen KJ, Oudegra R, et al. Excluding venous thromboembolism using point of care D-dimer tests in outpatients: a diagnostic meta-analysis. *BMJ.* 2009;339:2990. Fancher TL, White RH, Kravitz RL. Combined use of rapid D-dimer testing and estimation of clinical probability in the diagnosis of deep vein thrombosis: a systematic review. *BMJ.* 2004;329(7470):821. Anderson DR, Kovacs MJ, Kovacs G, et al. Combined use of clinical assessment and d-dimer to improve the management of patients presenting to the emergency department with suspected deep vein thrombosis (the EDITED Study). *J Thromb Haemost.* 2003;138(10):787-794. Schutgens REC, Ackermans P, Haas FJLM, et al. A diagnostic strategy involving a quantitative latex d-dimer assay reliably excludes deep venous thrombosis. *Ann Intern Med.* 2003;138(10):787-794. Schutgens REC, Ackermans P, Haas FJLM, et al. Combination of a normal D-dimer concentration and a non-high pretest clinical probability score is a safe strategy to exclude deep venous thrombosis. *Circulation.* 2003;107(4):593-659. Elf JL, Strandberg K, Nilsson C, et al. Clinical probability assessment and D-dimer determination in patients with suspected deep vein thrombosis, a prospective multicenter management study. *Thromb Res.* 2009;123:612-616. Dewar C, Selby C, Jamieson K, et al. Emergency department nurse-based outpatient diagnosis of DVT using an evidence-based protocol. *Emerg Med J.* 2006;25:411-416. Anderson DR, Wells PS, Stiell I, et al. Thrombosis in the emergency department: use of a clinical diagnosis model to safely avoid the need for urgent radiological investigation. *Arch Intern Med.* 1999;159(5):477-482. Tick LW, Ton E, van Voorthuizen R, et al. Practical diagnostic management of patients with clinically suspected deep vein thrombosis by clinical probability test, compression ultrasonography and D-dimer test. *Am J Med.* 2002;113(8):630-635. Wells PS, Anderson DR, Bormanis J, et al. Value of assessment of pre-test probability of deep vein thrombosis in clinical management. *Lancet.* 1997;350(9094):1795-1798. Ruiz-Gimenez N, Frieria A, Artieda P, et al. Rapid D-dimer test combined a clinical model for deep vein thrombosis. Validation with ultrasonography and clinical follow-up in 383 patients. *Thromb Haemost.* 2004;91(6):1237-1246. Wells PS, Owen C, Doucette S, Feigunson D, Tran H. Does this patient have deep vein thrombosis? *JAMA.* 2006;295(2):199-207. ceR. *Am J Roentgenol.* 2007;189(5):1071-1076. Consequences of presenting with VTE when specified strategies are used to rule out suspected first lower extremity DVT in patient with a low PTP. Settings: outpatients. See Table S1, S3, and S10 legends for expansion of abbreviations.

**Table S12—[Sections 3.1-3.5] Evidence Profiles for Diagnostic Studies Assessing DD, PTP, and Proximal US for the Diagnosis of Suspected First Lower Extremity DVT: Among Patients With Low to Moderate PTP, What Is the 3-mo Post-TP of VTE Following Exclusion of Proximal DVT with a Given Diagnostic Strategy?**

| No. of Studies                                                                                        | Design                                           | Limitations | Inconsistency | Indirectness                        | Imprecision                       | Other Considerations                                                                  | Summary of Findings                                              |              |          |                         |          |
|-------------------------------------------------------------------------------------------------------|--------------------------------------------------|-------------|---------------|-------------------------------------|-----------------------------------|---------------------------------------------------------------------------------------|------------------------------------------------------------------|--------------|----------|-------------------------|----------|
|                                                                                                       |                                                  |             |               |                                     |                                   |                                                                                       | No. of Patients                                                  | Control Risk | Relative | Effect                  |          |
|                                                                                                       |                                                  |             |               |                                     |                                   |                                                                                       | Starting Strategy/<br>For Follow-up<br>After Negative<br>for DVT |              |          | Absolute, %<br>(95% CI) | Quality  |
| 1                                                                                                     | Management cohort                                | ...         | ...           | ...                                 | Some (-1), upper limit of CI > 2% | ...                                                                                   | 852/500                                                          | Assumed 0    | N/A      | 1.4 (0.7-2.6)           | Moderate |
| Low to moderate PTP and negative moderately sensitive DD                                              |                                                  |             |               |                                     |                                   |                                                                                       |                                                                  |              |          |                         |          |
| 1                                                                                                     | Management cohort                                | ...         | ...           | ...                                 | Some (-1), upper limit of CI > 2% | Number of patients tested with each assay not clear                                   | 317/218                                                          | Assumed 0    | N/A      | 0.9 (0.2-2.9)           | Moderate |
| Low to moderate PTP and negative moderately or highly sensitive DD                                    |                                                  |             |               |                                     |                                   |                                                                                       |                                                                  |              |          |                         |          |
| 1                                                                                                     | Management cohort                                | ...         | ...           | ...                                 | ...                               | ...                                                                                   | 1,169/718                                                        | Assumed 0    | N/A      | 0.4 (0.1-1.5)           | Moderate |
| Low to moderate PTP and negative highly sensitive DD                                                  |                                                  |             |               |                                     |                                   |                                                                                       |                                                                  |              |          |                         |          |
| 1                                                                                                     | Meta-analysis of management and accuracy studies | ...         | ...           | Some (-1) accuracy studies included | ...                               | ...                                                                                   | ...                                                              | Assumed 0    | N/A      | 0.4 (0.1-1.1)           | Moderate |
| Low to moderate PTP and single negative proximal US                                                   |                                                  |             |               |                                     |                                   |                                                                                       |                                                                  |              |          |                         |          |
| 1                                                                                                     | Management cohort                                | ...         | ...           | ...                                 | Some (-1), upper limit of CI > 2% | ...                                                                                   | 284/272                                                          | Assumed 0    | N/A      | 1.5 (0.5-3.5)           | Moderate |
| Low to moderate PTP and positive DD (highly or moderately sensitive) followed by negative proximal US |                                                  |             |               |                                     |                                   |                                                                                       |                                                                  |              |          |                         |          |
| 1                                                                                                     | Management cohort                                | ...         | ...           | ...                                 | Some (-1), upper limit of CI > 2% | Mixed DD tests used in the study; number of patients tested with each assay not clear | 317/85                                                           | Assumed 0    | N/A      | 0 (0-3.5)               | Moderate |

Bibliography: Buller HR, Ten Cate-Hoek AJ, Hoes AW, et al. AMUSE (Amsterdam Maastricht Utrecht Study on thromboEmbolism in primary care. *Ann Intern Med.* 2009;150(4):229-235. Wells PS, Anderson DR, Rodger M, et al. Evaluation of D-dimer in the diagnosis of suspected deep-vein thrombosis. *N Engl J Med.* 2003;349(13):1227-1235. Gibson NS, Schellong WM, Kheir DY, et al. Safety and sensitivity of two ultrasound strategies in patients with clinically suspected deep venous thrombosis: a prospective management study. *J Thromb Haemost.* 2009;7(12):2035-2041. Fancher TL, White RH, Kravitz RL. Combined use of rapid D-dimer testing and estimation of clinical probability in the diagnosis of deep vein thrombosis: systematic review. *BMJ.* 2004;329(7590):821. Consequences of presenting with VTE when specified strategies are used to rule suspected first lower extremity DVT in patients with a low to moderate PTP. Settings: outpatients. See Table S1 and S3 legends for expansion of abbreviation.

**Table S13—[Sections 3.1-3.5] Evidence Profiles for Diagnostic Studies Assessing DD, PTP, and Proximal US for the Diagnosis of Suspected First Lower Extremity DVT: Among Patients With Moderate PTP, What Is the 3-mo Post-TP of VTE Following Exclusion of DVT With a Given Diagnostic Strategy?**

| No. of Studies                                                                          | Quality Assessment                             |             |               |                                      |                                   |                      | Summary of Findings |              |          |                                                                                                  |          |
|-----------------------------------------------------------------------------------------|------------------------------------------------|-------------|---------------|--------------------------------------|-----------------------------------|----------------------|---------------------|--------------|----------|--------------------------------------------------------------------------------------------------|----------|
|                                                                                         | Design                                         | Limitations | Inconsistency | Indirectness                         | Imprecision                       | Other Considerations | No. of Patients     | Control Risk | Relative | Absolute, % (95% CI)                                                                             | Quality  |
| 3                                                                                       | Meta-analyses of management and cohort studies | ...         | ...           | Some (-1), accuracy studies included | ...                               | ...                  | Assumed 0           | Assumed 0    | N/A      | 4.4; 3.5 (1.4-6.9), 4.9, or 5.2 (depending on DD, SimpliRED or Simplify), lower limit of CI > 3% | Moderate |
| Moderate PTP and negative moderately sensitive DD                                       |                                                |             |               |                                      |                                   |                      |                     |              |          |                                                                                                  |          |
| 3                                                                                       | Management cohort                              | ...         | ...           | Some (-1), upper limit of CI > 2%    | ...                               | 655/214              | Assumed 0           | Assumed 0    | N/A      | 0.6 (0.1-2.2)                                                                                    | Moderate |
| Moderate PTP and negative highly sensitive DD                                           |                                                |             |               |                                      |                                   |                      |                     |              |          |                                                                                                  |          |
| 2                                                                                       | Management and accuracy                        | ...         | ...           | Some (-1), accuracy studies included | Some (-1), upper limit of CI > 2% | ...                  | Assumed 0           | Assumed 0    | N/A      | NPV, 99 (96-100); estimated post-TP 1%                                                           | Low      |
| Point-of-care meta-analysis: 1.7 (1.0-3.8) or 4.3 (2.0-9.7) for Cardiac and Triage test |                                                |             |               |                                      |                                   |                      |                     |              |          |                                                                                                  |          |
| 1                                                                                       | Management cohort                              | ...         | ...           | ...                                  | Some (-1), upper limit of CI > 2% | 144/114              | Assumed 0           | Assumed 0    | N/A      | 0.9 (0.1-4.1)                                                                                    | Moderate |
| Moderate PTP and single negative proximal US                                            |                                                |             |               |                                      |                                   |                      |                     |              |          |                                                                                                  |          |
| 2                                                                                       | Management cohort                              | ...         | ...           | ...                                  | ...                               | 675/325              | Assumed 0           | Assumed 0    | N/A      | 0 (0-0.9)                                                                                        | High     |
| Moderate PTP with negative US and negative DD (either moderately or highly sensitive)   |                                                |             |               |                                      |                                   |                      |                     |              |          |                                                                                                  |          |
| Number of patients tested with each assay not clear                                     |                                                |             |               |                                      |                                   |                      |                     |              |          |                                                                                                  |          |
| 3                                                                                       | Management cohort                              | ...         | ...           | ...                                  | Some (-1), upper limit of CI > 2% | ?/365                | Assumed 0           | Assumed 0    | N/A      | 1.1 (0.4-2.5)                                                                                    | Moderate |
| Moderate PTP and negative serial proximal US                                            |                                                |             |               |                                      |                                   |                      |                     |              |          |                                                                                                  |          |

(Continued)



**Table S13—Continued**

| Quality Assessment                                                                                                    |                   | Summary of Findings |               |                                                     |                                   |                                                     |                                                         |              |          |                                       |          |
|-----------------------------------------------------------------------------------------------------------------------|-------------------|---------------------|---------------|-----------------------------------------------------|-----------------------------------|-----------------------------------------------------|---------------------------------------------------------|--------------|----------|---------------------------------------|----------|
|                                                                                                                       |                   | No. of Patients     | Relative      | Absolute, % (95% CI)                                | Quality                           |                                                     |                                                         |              |          |                                       |          |
| No. of Studies                                                                                                        | Design            | Limitations         | Inconsistency | Indirectness                                        | Imprecision                       | Other Considerations                                | Starting Strategy/ For Follow-up After Negative for DVT | Control Risk | Relative | Absolute, % (95% CI) <td>Quality</td> | Quality  |
| 1                                                                                                                     | Meta-analysis     | ...                 | ...           | Some (-1), includes accuracy and management studies | ...                               | ...                                                 | ...                                                     | Assumed 0    | N/A      | 0.6 (0.4-0.9)                         | Moderate |
| Moderate PTP and positive highly sensitive DD followed by single negative US                                          |                   |                     |               |                                                     |                                   |                                                     |                                                         |              |          |                                       |          |
| 1                                                                                                                     | Management cohort | ...                 | ...           | ...                                                 | Some (-1), upper limit of CI > 2% | ...                                                 | 134/73                                                  | Assumed 0    | N/A      | 0 (0-4.0)                             | Moderate |
| Moderate PTP with negative initial US and positive DD (either moderately or highly sensitive) followed by negative US |                   |                     |               |                                                     |                                   |                                                     |                                                         |              |          |                                       |          |
| 1                                                                                                                     | Management cohort | ...                 | ...           | ...                                                 | Some (-1), upper limit of CI > 2% | Number of patients tested with each assay not clear | 426/94                                                  | Assumed 0    | N/A      | 0 (0-0.3.1)                           | Moderate |

Bibliography: Wells PS, Owen C, Doucette S, Ferguson D, Tran H. Does this patient have deep vein thrombosis? *JAMA*. 2006;295(2):1997-2207. Geersing GJ, Janssen KJ, Oudega R, et al. Excluding venous thromboembolism using point of care D-dimer tests in outpatients: a diagnostic meta-analysis. *BMJ*. 2009;339:2990. Fancher TL, White RH, Kravitz RL. Combined use of rapid D-dimer testing and estimation of clinical probability in the diagnosis of deep vein thrombosis: a systematic review. *BMJ*. 2004;329(7470):821. Bates SM, Kearon C, Crowther M, et al. A diagnostic strategy involving a quantitative latex d-dimer assay reliably excludes deep venous thrombosis. *Ann Intern Med*. 2003;138(10):787-794. Schutgens REG, Ackermans P, Haas FJLM, et al. Combination of a normal D-dimer concentration and a non-high pretest clinical probability score is a safe strategy to exclude deep venous thrombosis. *Circulation*. 2003;107(4):583-597. Aguilar C, Martinez A, Del rio C, Vasquez M, Rodriguez FJ. Diagnostic value of D-dimer in patients with a moderate pre-test probability of deep venous thrombosis. *Br J Haematol*. 2002;118(1):275-277. Ruiz-Gimenez N, Frieria A, Artieda P, et al. Rapid D-dimer test combined a clinical model for deep vein thrombosis. Validation with ultrasonography and clinical follow-up in 383 patients. *Thromb Haemost*. 2004;91(6):1237-1246. Anderson DR, Kovacs MJ, Kovacs G, et al. Combined use of clinical assessment and d-dimer to improve the management of patients presenting to the emergency department with suspected deep vein thrombosis (the EDITED Study). *J Thromb Haemost*. 2003;1(4):645-651. Wells PS, Anderson DR, Rodger M, et al. Evaluation of D-dimer in the diagnosis of suspected deep-vein thrombosis. *N Engl J Med*. 2003;349(13):1227-1235. Anderson DR, Wells PS, Stiell I, et al. Thrombosis in the emergency department: use of a clinical diagnosis model to safely avoid the need for urgent radiological investigation. *Arch Intern Med*. 1999;159(5):477-482. Wells PS, Anderson DR, Bormanis J, et al. Value of assessment of pre-test probability of deep vein thrombosis in clinical management. *Lancet*. 1997;350(9094):1795-1798. Kearon C, Ginsberg JS, Douketix J, et al. A randomized trial of diagnostic strategies after normal proximal vein ultrasonography for suspected deep venous thrombosis: D-dimer testing compared with repeated ultrasonography. *Ann Intern Med*. 2005;142(7):490-496. Righini M, Perrier A, De Moerloose P, et al. D-dimer for venous thromboembolism diagnosis: 20 years later. *J Thromb Haemost*. 2008;6:1059-1071. Consequences of presenting with VTE when specified strategies are used to rule out suspected first lower extremity DVT in patients with a moderate PTP. Settings: outpatients. See Table S1 and S3 legends for expansion of abbreviations.

**Table S14—[Sections 3.1-3.5] Evidence Profiles for Diagnostic Studies Assessing DD, PTP, and Proximal US for the Diagnosis of Suspected First Lower Extremity DVT: Among Patients With Moderate to High PTP, What Is the 3-mo Post-TP of VTE Following Exclusion of Proximal DVT With a Given Diagnostic Strategy?**

| No. of Studies                                                                                                       | Quality Assessment |             |               |              |                                                                                     |                                                     |                                                                         | Summary of Findings |                 |                      |                                 |
|----------------------------------------------------------------------------------------------------------------------|--------------------|-------------|---------------|--------------|-------------------------------------------------------------------------------------|-----------------------------------------------------|-------------------------------------------------------------------------|---------------------|-----------------|----------------------|---------------------------------|
|                                                                                                                      | Design             | Limitations | Inconsistency | Indirectness | Imprecision                                                                         | Other Considerations                                | No. of Patients Starting Strategy/ For Follow-up After Negative for DVT | Control Risk        | Relative Effect | Absolute, % (95% CI) | Quality                         |
| 1                                                                                                                    | Management cohort  | ...         | ...           | ...          | Some (-1) with upper limit of CI reaching 2%                                        | ...                                                 | 531/148                                                                 | Assumed 0           | N/A             | 0 (0-2.0)            | Moderate                        |
| Moderate to high PTP and negative single proximal US and moderately sensitive DD                                     |                    |             |               |              |                                                                                     |                                                     |                                                                         |                     |                 |                      |                                 |
| 1                                                                                                                    | Management cohort  | ...         | ...           | ...          | Some (-1), upper limit of CI > 2%                                                   | Number of patients tested with each assay not clear | 249/81                                                                  | Assumed 0           | N/A             | 0 (0-3.6)            | Moderate                        |
| Moderate to high PTP and negative single proximal US and DD (moderately or highly sensitive)                         |                    |             |               |              |                                                                                     |                                                     |                                                                         |                     |                 |                      |                                 |
| Pooling of above two studies                                                                                         | Management cohort  | ...         | ...           | ...          | ...                                                                                 | Number of patients tested with each assay not clear | 750/229                                                                 | Assumed 0           | N/A             | 0 (0-1.3)            | High                            |
| Moderate to high PTP and negative serial proximal US                                                                 |                    |             |               |              |                                                                                     |                                                     |                                                                         |                     |                 |                      |                                 |
| 1                                                                                                                    | Management cohort  | ...         | ...           | ...          | Some (-1), upper limit of CI > 2%                                                   | ...                                                 | 246/181                                                                 | Assumed 0           | N/A             | 1.1 (0.2-3.4)        | Moderate                        |
| Moderate to high PTP with negative proximal US and positive moderately sensitive DD followed by negative proximal US |                    |             |               |              |                                                                                     |                                                     |                                                                         |                     |                 |                      |                                 |
| 1                                                                                                                    | Management cohort  | ...         | ...           | ...          | Some (lower limit of CI < 2%), major if we want to use it to exclude (upper CI > 5) | ...                                                 | 531/83                                                                  | Assumed 0           | N/A             | 3.6 (1-9.1)          | Moderate not to use, low to use |

(Continued)

**Table S14—Continued**

| No. of Studies | Quality Assessment |             |               |              |                                   |                                         | Summary of Findings |              |                 |               |          |
|----------------|--------------------|-------------|---------------|--------------|-----------------------------------|-----------------------------------------|---------------------|--------------|-----------------|---------------|----------|
|                | Design             | Limitations | Inconsistency | Indirectness | Imprecision                       | Other Considerations                    | No. of Patients     | Control Risk | Relative Effect | Quality       |          |
| 1              | Management cohort  | ...         | ...           | ...          | Some (-1), upper limit of CI > 2% | Not sure how many patients had which DD | 249/97              | Assumed 0    | N/A             | 0 (0-3.0)     | Moderate |
| 2              | Management cohort  | ...         | ...           | ...          | Some (-1), upper limit of CI > 2% | Not sure how many patients had which DD | 780/180             | Assumed 0    | N/A             | 1.7 (0.5-4.2) | Moderate |

Bibliography: Tieck LW, Ton E, van Voorthuizen T, et al. Practical diagnostic management of patients with clinically suspected deep vein thrombosis by clinical probability test, compression ultrasonography and D-dimer test. *Am J Med.* 2002;113(8):630-635. Wells PS, Anderson DR, Rodger M, et al. Evaluation of D-dimer in the diagnosis of suspected deep vein thrombosis. *N Engl J Med.* 2003;349(13):1227-1235. Consequences of presenting with VTE when specified strategies are used to rule out suspected first lower extremity DVT in patients with moderate to high PTP. Settings: outpatients. See Table S1 legend for expansion of abbreviation.

**Table S15—[Sections 3.1-3.5] Evidence Profiles for Diagnostic Studies Assessing DD, PTP, and Proximal US for the Diagnosis of Suspected First Lower Extremity DVT: Among Patients With High PTP, What Is the 3-mo Post-TP of VTE Following Exclusion of DVT With a Given Diagnostic Strategy?**

| No. of Studies                                | Design                                         | Limitations | Inconsistency | Indirectness                | Imprecision                                 | Other Considerations                                             | Summary of Findings                                     |           |              | Quality                           |          |
|-----------------------------------------------|------------------------------------------------|-------------|---------------|-----------------------------|---------------------------------------------|------------------------------------------------------------------|---------------------------------------------------------|-----------|--------------|-----------------------------------|----------|
|                                               |                                                |             |               |                             |                                             |                                                                  | No. of Patients                                         | Effect    | Control Risk |                                   |          |
| 2                                             | Meta-analysis of management and cohort studies | ...         | ...           | Some (-1), accuracy studies | ...                                         | Other Considerations                                             | Starting Strategy/ For Follow-up After Negative for DVT | Assumed 0 | N/A          | Absolute, % (95% CI)              | Moderate |
| High PTP and negative moderately sensitive DD |                                                |             |               |                             |                                             |                                                                  | ...                                                     | Assumed 0 | N/A          | In each case point estimate > 10% |          |
| 3                                             | Meta-analysis of management and cohort studies | ...         | ...           | Some (-1), accuracy studies | Minimal, in one case lower limit of CI < 2% | High PTP and negative highly sensitive DD                        | ...                                                     | Assumed 0 | N/A          | In each case point estimate > 5%  | Moderate |
| 2                                             | Management cohort                              | ...         | ...           | ...                         | Large, upper limit of CI 7.8%               | High PTP and negative single proximal US and highly sensitive DD | 350/59                                                  | Assumed 0 | N/A          | 1.7 (0.1-7.8)                     | Low      |
| 4                                             | Management cohort                              | ...         | ...           | ...                         | Some (-1), upper limit of CI > 2%           | High PTP and negative serial (x2) proximal US                    | 291/221                                                 | Assumed 0 | N/A          | 0.9 (0.2-2.8)                     | Moderate |

(Continued)

**Table S15—Continued**

| No. of Studies | Design            | Limitations | Inconsistency                                                                                       | Indirectness | Imprecision                          | Other Considerations | Summary of Findings                                     |                 |                      |                |     |
|----------------|-------------------|-------------|-----------------------------------------------------------------------------------------------------|--------------|--------------------------------------|----------------------|---------------------------------------------------------|-----------------|----------------------|----------------|-----|
|                |                   |             |                                                                                                     |              |                                      |                      | Starting Strategy/ For Follow-up After Negative for DVT | No. of Patients | Effect               |                |     |
|                |                   |             |                                                                                                     |              |                                      |                      | Control Risk                                            | Relative        | Absolute, % (95% CI) | Quality        |     |
| 1              | Management cohort | ...         | High PTP and negative proximal US and positive highly sensitive DD followed by negative proximal US | ...          | Major (-2), CI from 0.1% to 12.5%    | Scant data           | 279/36                                                  | Assumed 0       | N/A                  | 2.8 (0.1-12.5) | Low |
| 3              | Management cohort | ...         | High PTP and negative proximal US followed by negative venography                                   | ...          | Major (-2), upper limit of CI over 5 | Scant data           | 168/43                                                  | Assumed 0       | N/A                  | 0 (0-6.7)      | Low |

Bibliography: Wells PS, Owen C, Doucette S, Ferguson D, Tran H. Does this patient have deep vein thrombosis? *JAMA*. 2006;295(2):1997-2207. Fancher TL, White RH, Kravitz RL. Combined use of rapid D-dimer testing and estimation of clinical probability in the diagnosis of deep vein thrombosis: a systematic review. *BMJ*. 2004;329(7470):821. Geersing GJ, Janssen KJ, Oudega R, et al. Excluding venous thromboembolism using point of care D-dimer tests in outpatients: a diagnostic meta-analysis. *BMJ*. 2009;339:2990. Bates SM, Kearon C, Crowther M, et al. A diagnostic strategy involving a quantitative latex d-dimer assay reliably excludes deep venous thrombosis. *Ann Intern Med*. 2003;138(10):787-794. Schutgens REG, Ackermans P, Haas FJLM, et al. Combination of a normal D-dimer concentration and a non-high pretest clinical probability score is a safe strategy to exclude deep venous thrombosis. *Circulation*. 2003;107(4):593-597. Dewar C, Selby C, Jamieson K, et al. Emergency department nurse-based outpatient diagnosis of DVT using an evidence-based protocol. *Emergency Med*. 2008;25:411-416. Ruiz-Gimenez N, Frier A, Artieda P, et al. Rapid D-dimer test combined a clinical model for deep vein thrombosis. Validation with ultrasonography and clinical follow-up in 383 patients. *Thromb Haemost*. 2004;91(6):1237-1246. Kearon C, Ginsberg JS, Douketis J, et al. A randomized trial of diagnostic strategies after normal proximal vein ultrasonography for suspected deep venous thrombosis: D-dimer testing compared with repeated ultrasonography. *Ann Intern Med*. 2005;142(7):490-496. Anderson DR, Wells PS, Stiell I, et al. Thrombosis in the emergency department: use of a clinical diagnosis model to safely avoid the need for urgent radiological investigation. *Arch Intern Med*. 1999;159(5):477-482. Perrier A, Desmarais S, Miron MJ, et al. Non-invasive diagnosis of venous thromboembolism in outpatients. *Lancet*. 1999;353(9148):190-195. Wells PS, Anderson DR, Bormanis J, et al. Value of assessment of pre-test probability of deep vein thrombosis in clinical management. *Lancet*. 1997;350(9094):1795-1798. Consequences of presenting with VTE when specified strategies are used to rule out suspected first lower extremity DVT in patients with a high PTP. Settings: outpatients. See Table S1 legend for expansion of abbreviation.

**Table S16—[Sections 3.1-3.5] Evidence Profiles for Diagnostic Studies Assessing DD, PTP, and Proximal US for the Diagnosis of Suspected First Lower Extremity DVT: Among Patients With an Unspecified PTP, What Is the 3-mo Post-TP of VTE Following Exclusion of Proximal DVT With a Given Diagnostic Strategy?**

| No. of Studies                                                                                                                                                        | Quality Assessment                |             |                         |                                                 |                                   |                      |                                                                         | Summary of Findings |          |                                                                                                                               |          |
|-----------------------------------------------------------------------------------------------------------------------------------------------------------------------|-----------------------------------|-------------|-------------------------|-------------------------------------------------|-----------------------------------|----------------------|-------------------------------------------------------------------------|---------------------|----------|-------------------------------------------------------------------------------------------------------------------------------|----------|
|                                                                                                                                                                       | Design                            | Limitations | Inconsistency           | Indirectness                                    | Imprecision                       | Other Considerations | No. of Patients Starting Strategy/ For Follow-up After Negative for DVT | Control Risk        | Relative | Effect                                                                                                                        | Quality  |
| 5 meta-analyses                                                                                                                                                       | Meta-analysis of accuracy studies | ...         | Some inconsistency (-1) | Some (-1), accuracy studies                     | Some (-1)                         | ...                  | ...                                                                     | ...                 | ...      | Sensitivity from 93%-96% (point of care) to 97.7%, in modeling assuming best sensitivity (97.7%), post-TP > 2% for PTP of 30% | Moderate |
| 2                                                                                                                                                                     | Management and cohort studies     | ...         | ...                     | ...                                             | ...                               | Prevalence 22.1%     | 2,209/1,137                                                             | Assumed 0           | N/A      | 0.8 (0.4-1.4)                                                                                                                 | High     |
| Unspecified PTP and negative single proximal US and moderately sensitive DD                                                                                           |                                   |             |                         |                                                 |                                   |                      |                                                                         |                     |          |                                                                                                                               |          |
| 1                                                                                                                                                                     | Management cohort                 | ...         | ...                     | ...                                             | ...                               | Prevalence 23.3%     | 1,045/828                                                               | Assumed 0           | N/A      | 1.1 (0.6-1.9)                                                                                                                 | High     |
| Unspecified PTP and negative single proximal US followed by negative moderately sensitive DD or positive moderately sensitive DD and then negative second proximal US |                                   |             |                         |                                                 |                                   |                      |                                                                         |                     |          |                                                                                                                               |          |
| 1                                                                                                                                                                     | Management cohort                 | ...         | ...                     | ...                                             | ...                               | Prevalence 39.1%     | 686/598                                                                 | Assumed 0           | N/A      | 0.2 (0.2-0.8)                                                                                                                 | High     |
| Unspecified PTP and negative single proximal US followed by negative highly sensitive DD                                                                              |                                   |             |                         |                                                 |                                   |                      |                                                                         |                     |          |                                                                                                                               |          |
| 3                                                                                                                                                                     | Management cohort                 | ...         | ...                     | ...                                             | ...                               | Prevalence 20.9%     | 2,662/2071                                                              | Assumed 0           | N/A      | 1.0 (0.7-1.5)                                                                                                                 | High     |
| 1                                                                                                                                                                     | Meta-analysis                     | ...         | ...                     | Some (-1), both accuracy and management studies | ...                               | ...                  | ...                                                                     | Assumed 0           | N/A      | 0.6 (0.4-0.9)                                                                                                                 | Moderate |
| Unspecified PTP and negative serial proximal US                                                                                                                       |                                   |             |                         |                                                 |                                   |                      |                                                                         |                     |          |                                                                                                                               |          |
| 1                                                                                                                                                                     | Management cohort                 | ...         | ...                     | ...                                             | Some (-1), lower limit of CI < 2% | Prevalence 24.4%     | 1,739/520                                                               | Assumed 0           | N/A      | 2.1 (1.2-3.5)                                                                                                                 | Moderate |
| Unspecified PTP and negative proximal US plus positive moderately sensitive DD followed by negative proximal US                                                       |                                   |             |                         |                                                 |                                   |                      |                                                                         |                     |          |                                                                                                                               |          |

(Continued)

**Table S16—Continued**

| No. of Studies | Quality Assessment                                                                                                                                                |             |               |              |                                        | Summary of Findings  |                                                                         |              |          |                |          |
|----------------|-------------------------------------------------------------------------------------------------------------------------------------------------------------------|-------------|---------------|--------------|----------------------------------------|----------------------|-------------------------------------------------------------------------|--------------|----------|----------------|----------|
|                | Design                                                                                                                                                            | Limitations | Inconsistency | Indirectness | Imprecision                            | Other Considerations | No. of Patients Starting Strategy/ For Follow-up After Negative for DVT | Control Risk | Relative | Effect         | Quality  |
| 3              | Unspecified PTP with negative proximal US and positive highly sensitive DD (done in all or in those with a negative US) followed by a negative proximal US cohort | ...         | ...           | ...          | Some (-1), lower limit of CI < 2%      | Prevalence 31.6%     | 2,011/577                                                               | Assumed 0    | N/A      | 2.2 (1.3-3.5)  | Moderate |
| 1 <sup>s</sup> | Management cohort                                                                                                                                                 | ...         | ...           | ...          | Major (-2), only 2 events with wide CI | Prevalence 13.2%     | 470/58                                                                  | Assumed 0    | N/A      | 3.5 (0.6-10.5) | Low      |
| 1 <sup>2</sup> | Management cohort                                                                                                                                                 | ...         | ...           | ...          | Some (-1), lower limit of CI < 2%      | Prevalence 25.3%     | 474/343                                                                 | Assumed 0    | N/A      | 2.6 (1.4-4.5)  | Moderate |

Bibliography: Di Nisio M, Squizzato A, Rutjes AWS, et al. Diagnostic accuracy of D-dimer test for exclusion of venous thromboembolism: a systematic review. *J Thromb Haemost.* 2007;5:296-304. Geersing GJ, Janssen KJ, Oudega R, et al. Excluding venous thromboembolism using point of care D-dimer tests in outpatients: a diagnostic meta-analysis. *BMJ.* 2009;339:b2990. Goodacre S, Sampson FC, Sutton AJ, et al. Variation in the diagnostic performance of D-dimer for suspected deep vein thrombosis. *QJM.* 2005;98(7):513-527. Stein PD, Hull RD, Patel KC, et al. D-dimer for the exclusion of acute venous thrombosis and pulmonary embolism: a systematic review. *Ann Intern Med.* 2004;140:589-602. Fancher TL, White RH, Kravitz RL. Combined use of rapid D-dimer testing and estimation of clinical probability in the diagnosis of deep vein thrombosis: a systematic review. *BMJ.* 2004;329(7470):821. Kraaijenhagen RA, Piovella F, Bernardi E, et al. Simplification of the diagnostic management of suspected deep vein thrombosis. *Arch Intern Med.* 2002;162(8):907-911. Kearon C, Ginsberg JS, Douketis J, et al. A randomized trial of diagnostic strategies after normal proximal vein ultrasonography for suspected deep venous thrombosis: D-dimer testing compared with repeated ultrasonography. *Ann Intern Med.* 2005;142(7):490-496. Bernardi E, Camporese G, Buller HR, et al. Serial 2-point ultrasonography plus D-dimer vs whole-leg color-coded Doppler ultrasonography for diagnosing suspected symptomatic deep vein thrombosis: a randomized controlled trial. *JAMA.* 2008;300:1653-1659. Prandoni P, Lensing AW, et al. D-dimer testing as an adjunct to ultrasonography in patients with clinically suspected deep vein thrombosis: prospective cohort study. *BMJ.* 1998;316(7124):17-20. Righini M, Perrier A, De Moerloose P, et al. D-Dimer for venous thromboembolism diagnosis: 20 years later. *J Thromb Haemost.* 2008;6:1059-1071. Bates SM, Kearon C, Crowther M, et al. A diagnostic strategy involving a quantitative latex d-dimer assay reliably excludes deep venous thrombosis. *Ann Intern Med.* 2003;138(10):787-794. Schuitgens REG, Ackermans P, Haas FJLM, et al. Combination of a normal D-dimer concentration and a non-high pretest clinical probability score is a safe strategy to exclude deep venous thrombosis. *Circulation.* 2003;107(4):593-559. Perrier A, Desmarais S, Miron MJ, et al. Non-invasive diagnosis of venous thromboembolism in outpatients. *Lancet.* 1999;353(9148):190-195. Consequences of presenting with VTE when specified strategies are used to rule suspected first lower extremity DVT in patients with an unspecified PTP. Settings: outpatients. See Table S1 legend for expansion of abbreviation.

**Table S17—[Sections 3.2-3.5] Methodology of Diagnostic Studies Evaluating Whole-Leg US in First Suspected Lower Extremity DVT: Meta-analysis of Accuracy Studies**

| Study/Year                         | Study Eligibility                                        |                                                                                                                      |                                                                                              | Exploration of Heterogeneity                         | Comments                                                                                     |
|------------------------------------|----------------------------------------------------------|----------------------------------------------------------------------------------------------------------------------|----------------------------------------------------------------------------------------------|------------------------------------------------------|----------------------------------------------------------------------------------------------|
|                                    | Patient Population                                       | Diagnostic Test                                                                                                      | Outcome (Criterion Standard)                                                                 |                                                      |                                                                                              |
| Goodacre et al <sup>11</sup> /2006 | Broad population, analyzed subgroup with symptoms of DVT | Tested 31 possible diagnostic algorithms using meta-analysis and modeling; whole-leg US, repeat if distal DVT imaged | All strategies compared against venography for all patients and no diagnostic testing at all | Varied with strategy                                 | The modeling provided reporting for specificity of US for all DVT                            |
| Kearon et al <sup>12</sup> /1998   | Symptomatic inpatients and outpatients                   | Whole-leg US                                                                                                         | Venography                                                                                   | $\chi^2$ comparison derived from fixed-effects model | Included 11 studies, 9 reporting specificity for distal DVT, which met methodologic criteria |

All studies are cross-sectional unless otherwise indicated under Comments. IPD = individual patient data. See Table S1 legend for expansion of other abbreviation.



**Table S18—[Sections 3.2-3.5] Methodology of Diagnostic Studies Evaluating Whole-Leg US in First Suspected Lower Extremity DVT: Individual Accuracy Studies**

| Study/Year                               | Study Details       |                  |           |           | Outcome<br>(Criterion Standard) | Consecutive<br>Patients | Independent<br>Test Assessment | Comments |
|------------------------------------------|---------------------|------------------|-----------|-----------|---------------------------------|-------------------------|--------------------------------|----------|
|                                          | Patient Population  | Diagnostic Test  | Diagnosis | Reference |                                 |                         |                                |          |
| Atri et al <sup>65</sup> /1996           | Symptomatic for DVT | US of calf veins | Yes       | Yes       | Venography                      | Yes                     | No                             |          |
| Baxter et al <sup>44</sup> /1990         | Symptomatic for DVT | US of calf veins | No        | No        | Venography                      | No                      | Yes                            |          |
| Baxter et al <sup>45</sup> /1992         | Symptomatic for DVT | US of calf veins | No        | No        | Venography                      | No                      | Yes                            |          |
| Belcaro et al <sup>46</sup> /1992        | Symptomatic for DVT | US of calf veins | Yes       | Yes       | Venography                      | Yes                     | No                             |          |
| Bendick et al <sup>47</sup> /1983        | Symptomatic for DVT | US of calf veins | No        | No        | Venography                      | No                      | No                             |          |
| Biondetti et al <sup>48</sup> /1990      | Symptomatic for DVT | US of calf veins | Yes       | Yes       | Venography                      | Yes                     | No                             |          |
| Bradley et al <sup>49</sup> /1993        | Symptomatic for DVT | US of calf veins | Yes       | Yes       | Venography                      | Yes                     | No                             |          |
| Burke et al <sup>50</sup> /1994          | Symptomatic for DVT | US of calf veins | Yes       | Yes       | Venography                      | Yes                     | Yes                            |          |
| Cogo et al <sup>51</sup> /1993           | Symptomatic for DVT | US of calf veins | Yes       | Yes       | Venography                      | Yes                     | No                             |          |
| De Laveaucoump et al <sup>52</sup> /1989 | Symptomatic for DVT | US of calf veins | No        | No        | Venography                      | No                      | Yes                            |          |
| Elias <sup>53</sup> /1987                | Symptomatic for DVT | US of calf veins | Yes       | Yes       | Venography                      | Yes                     | Yes                            |          |
| Forbes et al <sup>54</sup> /1998         | Symptomatic for DVT | US of calf veins | Yes       | Yes       | Venography                      | Yes                     | No                             |          |
| Grobety et al <sup>55</sup> /1996        | Symptomatic for DVT | US of calf veins | Yes       | Yes       | Venography                      | Yes                     | No                             |          |
| Guazzaloca et al <sup>56</sup> /1997     | Symptomatic for DVT | US of calf veins | Yes       | Yes       | Venography                      | Yes                     | Yes                            |          |
| Habscheid et al <sup>57</sup> /1990      | Symptomatic for DVT | US of calf veins | No        | No        | Venography                      | No                      | Yes                            |          |
| Kalodiki et al <sup>58</sup> /1993       | Symptomatic for DVT | US of calf veins | No        | No        | Venography                      | No                      | No                             |          |
| Labropoulos et al <sup>59</sup> /1995    | Symptomatic for DVT | US of calf veins | No        | No        | Venography                      | No                      | Yes                            |          |
| Lensing et al <sup>60</sup> /1989        | Symptomatic for DVT | US of calf veins | Yes       | Yes       | Venography                      | Yes                     | Yes                            |          |
| Leven and Hassan <sup>61</sup> /1990     | Symptomatic for DVT | US of calf veins | No        | No        | Venography                      | No                      | No                             |          |
| Lindqvist <sup>62</sup> /1977            | Symptomatic for DVT | US of calf veins | No        | No        | Venography                      | No                      | No                             |          |
| Mattos et al <sup>63</sup> /1992         | Symptomatic for DVT | US of calf veins | Yes       | Yes       | Venography                      | Yes                     | Yes                            |          |
| McCandless et al <sup>64</sup> /1985     | Symptomatic for DVT | US of calf veins | Yes       | Yes       | Venography                      | Yes                     | No                             |          |
| Miller et al <sup>65</sup> /1996         | Symptomatic for DVT | US of calf veins | Yes       | Yes       | Venography                      | Yes                     | Yes                            |          |
| Mitchell et al <sup>66</sup> /1991       | Symptomatic for DVT | US of calf veins | Yes       | Yes       | Venography                      | Yes                     | Yes                            |          |
| Monreal et al <sup>67</sup> /1989        | Symptomatic for DVT | US of calf veins | Yes       | Yes       | Venography                      | Yes                     | Yes                            |          |
| Puls et al <sup>68</sup> /1999           | Symptomatic for DVT | US of calf veins | No        | No        | Venography                      | No                      | No                             |          |
| Quintavalla et al <sup>69</sup> /1992    | Symptomatic for DVT | US of calf veins | Yes       | Yes       | Venography                      | Yes                     | No                             |          |
| Robertson et al <sup>70</sup> /1995      | Symptomatic for DVT | US of calf veins | No        | No        | Venography                      | No                      | Yes                            |          |
| Robertson et al <sup>71</sup> /1994      | Symptomatic for DVT | US of calf veins | No        | No        | Venography                      | No                      | Yes                            |          |
| Rose et al <sup>72</sup> /1990           | Symptomatic for DVT | US of calf veins | Yes       | Yes       | Venography                      | Yes                     | Yes                            |          |
| Rostier et al <sup>73</sup> /1992        | Symptomatic for DVT | US of calf veins | No        | No        | Venography                      | No                      | No                             |          |

(Continued)

**Table S18—Continued**

| Study/Year                            | Study Details                                                                                                              |                     |                                                  |                      | Independent Test Assessment                                                                                                                                                                                                                                                                | Comments                |
|---------------------------------------|----------------------------------------------------------------------------------------------------------------------------|---------------------|--------------------------------------------------|----------------------|--------------------------------------------------------------------------------------------------------------------------------------------------------------------------------------------------------------------------------------------------------------------------------------------|-------------------------|
|                                       | Patient Population                                                                                                         | Diagnostic Test     | Outcome (Criterion Standard)                     | Consecutive Patients |                                                                                                                                                                                                                                                                                            |                         |
| Savy-Stortz et al <sup>74</sup> /1995 | Symptomatic for DVT                                                                                                        | US of calf veins    | Venography                                       | No                   | No                                                                                                                                                                                                                                                                                         |                         |
| Simons et al <sup>75</sup> /1995      | Symptomatic for DVT                                                                                                        | US of calf veins    | Venography                                       | No                   | No                                                                                                                                                                                                                                                                                         |                         |
| Size et al <sup>76</sup> /1993        | Symptomatic for DVT                                                                                                        | US of calf veins    | Venography                                       | No                   | Yes                                                                                                                                                                                                                                                                                        |                         |
| Yucel et al <sup>77</sup> /1991       | Symptomatic for DVT                                                                                                        | US of calf veins    | Venography                                       | No                   | No                                                                                                                                                                                                                                                                                         |                         |
| Zhou et al <sup>78</sup> /1990        | Symptomatic for DVT                                                                                                        | US of calf veins    | Venography                                       | No                   | No                                                                                                                                                                                                                                                                                         |                         |
| Palareti et al <sup>79</sup> /2010    | Suspected DVT, ambulatory patients. No proximal DVT seen on proximal CUS, "DVT likely" PTP or positive highly sensitive DD | Single whole-leg US | Results of serial proximal US and 3-mo follow-up | ?                    | Yes, patients received alternate tests as management driven by proximal US results; whole-leg US results blinded and not used for management. Patients with isolated calf DVT on whole-leg US not anticoagulated but followed with serial proximal US and if negative followed for outcome | Single-arm cohort study |

In addition to meta-analysis, all studies are cross-sectional unless otherwise indicated under Comments. See Table S1 legend for expansion of abbreviation.

**Table S19—[Sections 3.2-3.5] Methodology of Diagnostic Studies Evaluating Whole-Leg US in First Suspected Lower Extremity DVT: Meta-analysis of Management Cohort Studies**

| Study/Year                       | Study Eligibility        |                     |                           |                                                       | Exploration of Heterogeneity | Comments                                                               |
|----------------------------------|--------------------------|---------------------|---------------------------|-------------------------------------------------------|------------------------------|------------------------------------------------------------------------|
|                                  | Patient Population       | Diagnostic Test     | Outcome                   | Methods (Single-Arm Cohort vs Cohort From RCT)        |                              |                                                                        |
| Johnson et al <sup>3</sup> /2010 | Clinically suspected DVT | Single whole-leg US | ≥ 90 d probability of VTE | Single-arm cohort (6 trials) one arm of RCT (1 trial) | Random effects model         | Included IPD met-analysis from 2 included studies to assess PTP groups |

Cohorts from single-arm studies or cohorts representing one of the arms of an RCT. See Table S1 and S2 legends for expansion of abbreviations.

**Table S20—[Sections 3.2-3.5] Methodology of Diagnostic Studies Evaluating Whole-Leg US in First Suspected Lower Extremity DVT: Individual Management Studies With Cohorts**

| Study Details        |                                                                                                          |                     |                         |                                        |                                                     |                            |                                                                                                                                                      |
|----------------------|----------------------------------------------------------------------------------------------------------|---------------------|-------------------------|----------------------------------------|-----------------------------------------------------|----------------------------|------------------------------------------------------------------------------------------------------------------------------------------------------|
| Study/Year           | Patient Population                                                                                       | Diagnostic Test     | Outcome                 | Methods                                | Follow-up                                           | Received Alternative Tests |                                                                                                                                                      |
|                      |                                                                                                          |                     |                         | (Single-Arm Cohort vs Cohort From RCT) |                                                     |                            | Consecutive Patients                                                                                                                                 |
| Bernardi et al/2008  | Clinically suspected, first episode DVT (ambulatory patients)                                            | Single whole-leg US | 3-mo probability of VTE | Arm of RCT                             | Telephone or in person                              | No                         | DVT diagnosed by noncompressibility and lack of augmentation in muscular calf veins                                                                  |
| Gibson et al/2009    | Clinically suspected, first episode DVT, likely Wells score or positive highly sensitive DD (Tina-quant) | Single whole-leg US | 3-mo probability of VTE | Arm of RCT                             | Telephone or in person                              | No                         | DVT diagnosed by noncompressibility                                                                                                                  |
| Elias et al/2003     | Clinically suspected, first episode DVT (ambulatory patients)                                            | Single whole-leg US | 3-mo probability of VTE | Single-arm cohort                      | Telephone or in person                              | No                         | Excluded patients with high pretest by the original Wells criteria<br>DVT diagnosed by noncompressibility and intraluminal thrombus                  |
| Schellong et al/2003 | Clinically suspected DVT (ambulatory and inpatients)                                                     | Single whole-leg US | 90-d probability of VTE | Single-arm cohort                      | Telephone, mail, in person                          | No                         | DVT diagnosed by noncompressibility                                                                                                                  |
| Sevestre et al/2009  | Clinically suspected DVT (ambulatory patients)                                                           | Single whole-leg US | 3-mo probability of VTE | Single-arm cohort                      | Telephone interview and record review, vital status | No                         | A priori random selection of population to complete follow-up<br>DVT diagnosed by noncompressibility and lack of augmentation in muscular calf veins |
| Sevestre et al/2010  | Clinically suspected DVT (inpatients)                                                                    | Single whole-leg US | 3-mo probability of VTE | Single-arm cohort                      | Telephone interview and record review, vital status | No                         | A priori random selection of population to complete follow-up<br>(Continued)                                                                         |

**Table S20—Continued**

| Study/Year                           | Study Details                                                       |                     |                         |                                                |                      | Received Alternative Tests            | Comments                                                                            |
|--------------------------------------|---------------------------------------------------------------------|---------------------|-------------------------|------------------------------------------------|----------------------|---------------------------------------|-------------------------------------------------------------------------------------|
|                                      | Patient Population                                                  | Diagnostic Test     | Outcome                 | Methods (Single-Arm Cohort vs Cohort From RCT) | Consecutive Patients |                                       |                                                                                     |
| Stevens et al <sup>8</sup> /2004     | Clinically suspected, first episode DVT (ambulatory and inpatients) | Single whole-leg US | 3-mo probability of VTE | Single-arm cohort                              | Yes (445)            | Telephone or in person, record review | DVT diagnosed by noncompressibility and lack of augmentation in muscular calf veins |
| Subramaniam et al <sup>9</sup> /2005 | Clinically suspected DVT (ambulatory patients)                      | Single whole-leg US | 3-mo probability of VTE | Single-arm cohort                              | Yes (526)            | Telephone or in person, record review | DVT diagnosed by noncompressibility                                                 |

Cohorts from single-arm studies or cohorts representing one of the arms of an RCT. See Table S1 and S2 legends for expansion of abbreviations.

**Table S21—[Sections 3.2-3.5] Methodology of Diagnostic Studies Evaluating Whole-Leg US in First Suspected Lower Extremity DVT: Individual RCTs With Direct Comparison Of Diagnostic Strategies**

| Study/Year                           | Study Details                                                                                                |                        |                                                    |                              |                                 |             |                           |                                |
|--------------------------------------|--------------------------------------------------------------------------------------------------------------|------------------------|----------------------------------------------------|------------------------------|---------------------------------|-------------|---------------------------|--------------------------------|
|                                      | Patient Population                                                                                           | Test 1/<br>Strategy 1  | Test 2/<br>Strategy 2                              | Outcome                      | Concealment of<br>Randomization | Blinding    | Follow-up                 | Intention to Treat             |
| Bernardi<br>et al <sup>2</sup> /2008 | Clinically<br>suspected DVT                                                                                  | Single<br>whole-leg US | Serial proximal US;<br>single proximal US<br>if DD | VTE during 3-mo<br>follow-up | Not concealed                   | Not blinded | Telephone or<br>in person | N/A (no crossover<br>occurred) |
| Gibson<br>et al <sup>1</sup> /2009   | Clinically<br>suspected DVT;<br>likely Wells score<br>and/or positive highly<br>sensitive DD<br>(Tina-quant) | Single<br>whole-leg US | Serial proximal US                                 | VTE during 3-mo<br>follow-up | Not concealed                   | Not blinded | Telephone or<br>in person | N/A (no crossover<br>occurred) |

See Table S1 and S2 legends for expansion of abbreviations.

**Table S22—[3.2-3.5] Description and Results of Diagnostic Studies Evaluating Whole-Leg US in First Suspected Lower Extremity DVT: Cross-sectional Accuracy and Cohort Management Studies**

| Question from Structured Clinical Question Table                         | Clinical Situation/Question | Meta-analysis vs Primary Study | Accuracy | Patient Population | Outcome Measure <sup>a</sup> | Result, % (95% CI) | Comments | Reference                                |
|--------------------------------------------------------------------------|-----------------------------|--------------------------------|----------|--------------------|------------------------------|--------------------|----------|------------------------------------------|
| What are the consequences of using whole-leg CUS to diagnose distal DVT? | All patients                | Primary                        | Accuracy | Symptomatic        | Specificity (vs venography)  | 96 (86.3-99.5)     |          | Atri et al <sup>45</sup> /1996           |
|                                                                          |                             | Primary                        | Accuracy | Symptomatic        | Specificity (vs venography)  | 100 (86.8-100)     |          | Baxter et al <sup>44</sup> /1990         |
|                                                                          |                             | Primary                        | Accuracy | Symptomatic        | Specificity (vs venography)  | 100 (83.2-100)     |          | Baxter et al <sup>45</sup> /1992         |
|                                                                          |                             | Primary                        | Accuracy | Symptomatic        | Specificity (vs venography)  | 100 (79.4-100)     |          | Belcaro et al <sup>46</sup> /1992        |
|                                                                          |                             | Primary                        | Accuracy | Symptomatic        | Specificity (vs venography)  | 96.6 (90.4-99.3)   |          | Bendick et al <sup>47</sup> /1983        |
|                                                                          |                             | Primary                        | Accuracy | Symptomatic        | Specificity (vs venography)  | 100 (96.9-100)     |          | Biondetti et al <sup>48</sup> /1990      |
|                                                                          |                             | Primary                        | Accuracy | Symptomatic        | Specificity (vs venography)  | 100 (92.9-100)     |          | Bradley et al <sup>49</sup> /1993        |
|                                                                          |                             | Primary                        | Accuracy | Symptomatic        | Specificity (vs venography)  | 100 (95.4-100)     |          | Burke et al <sup>50</sup> /1994          |
|                                                                          |                             | Primary                        | Accuracy | Symptomatic        | Specificity (vs venography)  | 100 (63.1-100)     |          | Cogo et al <sup>51</sup> /1993           |
|                                                                          |                             | Primary                        | Accuracy | Symptomatic        | Specificity (vs venography)  | 97.9 (92.5-99.7)   |          | De Laveaucoupe et al <sup>52</sup> /1989 |
|                                                                          |                             | Primary                        | Accuracy | Symptomatic        | Specificity (vs venography)  | 96.4 (94.4-97.9)   |          | Elias et al <sup>53</sup> /1987          |
|                                                                          |                             | Primary                        | Accuracy | Symptomatic        | Specificity (vs venography)  | 79.3 (60.3-92.0)   |          | Forbes et al <sup>54</sup> /1998         |
|                                                                          |                             | Primary                        | Accuracy | Symptomatic        | Specificity (vs venography)  | 95.5 (84.5-99.4)   |          | Grobety et al <sup>55</sup> /1996        |
|                                                                          |                             | Primary                        | Accuracy | Symptomatic        | Specificity (vs venography)  | 100 (96.0-100)     |          | Habscheid et al <sup>57</sup> /1990      |
|                                                                          |                             | Primary                        | Accuracy | Symptomatic        | Specificity (vs venography)  | 94.3 (84.3-98.8)   |          | Kalodiki et al <sup>58</sup> /1993       |
|                                                                          |                             | Primary                        | Accuracy | Symptomatic        | Specificity (vs venography)  | 98.1 (90.1-100)    |          | Labropoulos et al <sup>59</sup> /1995    |

(Continued)

**Table S22—Continued**

| Question from Structured Clinical Question Table | Clinical Situation/Question | Meta-analysis vs Primary Study | Accuracy if Cohort Is From an RCT | Patient Population | Outcome Measure <sup>a</sup> | Result, % (95% CI) | Comments | Reference                             |
|--------------------------------------------------|-----------------------------|--------------------------------|-----------------------------------|--------------------|------------------------------|--------------------|----------|---------------------------------------|
|                                                  |                             | Primary                        | Accuracy                          | Symptomatic        | Specificity (vs venography)  | 99.3 (96.2-100)    |          | Lensing et al <sup>69</sup> /1989     |
|                                                  |                             | Primary                        | Accuracy                          | Symptomatic        | Specificity (vs venography)  | 100 (59.0-100)     |          | Leven et al <sup>69</sup> /1990       |
|                                                  |                             | Primary                        | Accuracy                          | Symptomatic        | Specificity (vs venography)  | 100 (85.2-100)     |          | Lindqvist et al <sup>69</sup> /1977   |
|                                                  |                             | Primary                        | Accuracy                          | Symptomatic        | Specificity (vs venography)  | 75.0 (58.8-87.3)   |          | Mattos et al <sup>69</sup> /1992      |
|                                                  |                             | Primary                        | Accuracy                          | Symptomatic        | Specificity (vs venography)  | 100 (90.3-100)     |          | McCandless et al <sup>69</sup> /1985  |
|                                                  |                             | Primary                        | Accuracy                          | Symptomatic        | Specificity (vs venography)  | 99.2 (95.9-100)    |          | Miller et al <sup>69</sup> /1996      |
|                                                  |                             | Primary                        | Accuracy                          | Symptomatic        | Specificity (vs venography)  | 89.3 (71.8-97.7)   |          | Mitchell et al <sup>69</sup> /1991    |
|                                                  |                             | Primary                        | Accuracy                          | Symptomatic        | Specificity (vs venography)  | 100 (81.5-100)     |          | Monreal et al <sup>69</sup> /1989     |
|                                                  |                             | Primary                        | Accuracy                          | Symptomatic        | Specificity (vs venography)  | 72.7 (39.0-94.0)   |          | Puls et al <sup>69</sup> /1999        |
|                                                  |                             | Primary                        | Accuracy                          | Symptomatic        | Specificity (vs venography)  | 42.1 (20.3-66.5)   |          | Robertson et al <sup>70</sup> /1995   |
|                                                  |                             | Primary                        | Accuracy                          | Symptomatic        | Specificity (vs venography)  | 60.6 (42.1-77.1)   |          | Robertson et al <sup>71</sup> /1994   |
|                                                  |                             | Primary                        | Accuracy                          | Symptomatic        | Specificity (vs venography)  | 73.3 (54.1-87.7)   |          | Rose et al <sup>72</sup> /1990        |
|                                                  |                             | Primary                        | Accuracy                          | Symptomatic        | Specificity (vs venography)  | 89.5 (80.3-95.3)   |          | Rosier et al <sup>73</sup> /1992      |
|                                                  |                             | Primary                        | Accuracy                          | Symptomatic        | Specificity (vs venography)  | 76.2 (52.8-91.8)   |          | Savy-Stortz et al <sup>74</sup> /1995 |
|                                                  |                             | Primary                        | Accuracy                          | Symptomatic        | Specificity (vs venography)  | 100 (59.0-100)     |          | Simons et al <sup>75</sup> /1995      |
|                                                  |                             | Primary                        | Accuracy                          | Symptomatic        | Specificity (vs venography)  | 84.6 (54.6-98.1)   |          | Size et al <sup>76</sup> /1993        |
|                                                  |                             | Primary                        | Accuracy                          | Symptomatic        | Specificity (vs venography)  | 88.2 (63.6-98.5)   |          | Yucek et al <sup>77</sup> /1991       |
|                                                  |                             | Primary                        | Accuracy                          | Symptomatic        | Specificity (vs venography)  | 100 (47.8-100)     |          | Zhou et al <sup>78</sup> /1990        |

(Continued)



**Table S22—Continued**

| Question from Structured Clinical Question Table                          | Clinical Situation/Question                                                                          | Meta-analysis vs Primary Study | Accuracy vs Management Cohort (Indicate if Cohort Is From an RCT) | Patient Population                                                                                                                  | Outcome Measure <sup>a</sup>                     | Result, % (95% CI)                                                                                                                   | Comments | Reference                          |
|---------------------------------------------------------------------------|------------------------------------------------------------------------------------------------------|--------------------------------|-------------------------------------------------------------------|-------------------------------------------------------------------------------------------------------------------------------------|--------------------------------------------------|--------------------------------------------------------------------------------------------------------------------------------------|----------|------------------------------------|
|                                                                           | Patients without proximal DVT by proximal CUS, “DVT-likely” pretest, or positive highly sensitive DD | Primary                        | Accuracy                                                          | Symptomatic                                                                                                                         | Result of serial proximal US and ≥90-d follow-up | All: 1.2 (0.4-2.7)<br>No calf DVT: 0.8 (0-2)<br>Calf DVT: 7.8 (3-17)                                                                 |          | Palareti et al <sup>79</sup> /2010 |
|                                                                           | If low pretest                                                                                       | N/A                            | N/A                                                               | N/A                                                                                                                                 | N/A                                              | N/A                                                                                                                                  |          |                                    |
|                                                                           | If moderate pretest                                                                                  | N/A                            | N/A                                                               | N/A                                                                                                                                 | N/A                                              | N/A                                                                                                                                  |          |                                    |
|                                                                           | If high pretest                                                                                      | N/A                            | N/A                                                               | N/A                                                                                                                                 | N/A                                              | N/A                                                                                                                                  |          |                                    |
|                                                                           | If positive highly sensitive DD                                                                      | N/A                            | N/A                                                               | N/A                                                                                                                                 | N/A                                              | N/A                                                                                                                                  |          |                                    |
|                                                                           | If positive moderately sensitive DD                                                                  | N/A                            | N/A                                                               | N/A                                                                                                                                 | N/A                                              | N/A                                                                                                                                  |          |                                    |
|                                                                           | If negative highly sensitive DD                                                                      | N/A                            | N/A                                                               | N/A                                                                                                                                 | N/A                                              | N/A                                                                                                                                  |          |                                    |
|                                                                           | If negative moderately sensitive DD                                                                  | N/A                            | N/A                                                               | N/A                                                                                                                                 | N/A                                              | N/A                                                                                                                                  |          |                                    |
| What are the consequences of using a single whole-leg CUS to exclude DVT? | Negative single whole-leg US on day of presentation – all patients                                   | Meta-analysis                  | Management cohort (6 trials) arm of RCT (1 trial)                 | Clinically suspected DVT (Analyzed studies included inpatients, ambulatory patients, or both. Some restricted to first-episode DVT) | ≥90-d probability of VTE                         | 0.57 (0.25-0.89) pooled event rate                                                                                                   |          | Johnson et al <sup>8</sup> /2010   |
|                                                                           | Primary                                                                                              | Management                     | Symptomatic first episode                                         | ≥90-d probability of VTE                                                                                                            | 0.5 (0.1-1.8)                                    | Excluded patients with high pretest by the original Wells criteria<br>DVT diagnosed by noncompressibility plus intraluminal thrombus |          | Elias et al <sup>9</sup> /2003     |

(Continued)

**Table S22—Continued**

| Question from Structured Clinical Question Table | Clinical Situation/Question                                               | Meta-analysis vs Primary Study | Accuracy vs Management Cohort (Indicate if Cohort Is From an RCT) | Patient Population                                                                                                                   | Outcome Measure <sup>a</sup> | Result, % (95% CI)     | Comments                                                                             | Reference                            |
|--------------------------------------------------|---------------------------------------------------------------------------|--------------------------------|-------------------------------------------------------------------|--------------------------------------------------------------------------------------------------------------------------------------|------------------------------|------------------------|--------------------------------------------------------------------------------------|--------------------------------------|
|                                                  |                                                                           | Primary                        | Management                                                        | Symptomatic                                                                                                                          | ≥ 90-d probability of VTE    | 0.3 (0.1-0.8)          | DVT diagnosed by noncompressibility                                                  | Schellong et al <sup>9</sup> /2003   |
|                                                  |                                                                           | Primary                        | Management                                                        | Symptomatic outpatients                                                                                                              | ≥ 90-d probability of VTE    | 0.4 (0.1-0.9)          | DVT diagnosed by noncompressibility plus lack of augmentation in muscular calf veins | Sevestre et al <sup>9</sup> /2009    |
|                                                  |                                                                           | Primary                        | Management                                                        | Symptomatic inpatients                                                                                                               | ≥ 90-d probability of VTE    | 1.9 (0.9-3.5)          | DVT diagnosed by noncompressibility plus lack of augmentation in muscular calf veins | Sevestre et al <sup>7</sup> /2010    |
|                                                  |                                                                           | Primary                        | Management                                                        | Symptomatic inpatients                                                                                                               | ≥ 90-d probability of VTE    | 0.80 (0.16-2.33)       | DVT diagnosed by noncompressibility                                                  | Stevens et al <sup>9</sup> /2004     |
|                                                  |                                                                           | Primary                        | Management                                                        | Symptomatic inpatients                                                                                                               | ≥ 90-d probability of VTE    | 0.24 (0.01-1.3)        | DVT diagnosed by noncompressibility                                                  | Subramaniam et al <sup>9</sup> /2005 |
|                                                  | Negative single whole-leg US on day of presentation – if low pretest      | Meta-analysis                  | IPD meta-analysis from 2 management cohort studies                | Clinically suspected DVT. (Analyzed studies included inpatients, ambulatory patients, or both. Some restricted to first-episode DVT) | 3-mo probability of VTE      | 0.29 pooled event rate |                                                                                      | Johnson et al <sup>9</sup> /2010     |
|                                                  | Negative single whole-leg US on day of presentation – if moderate pretest | Meta-analysis                  | IPD meta-analysis from 2 management cohort studies                | Clinically suspected DVT. (Analyzed studies included inpatients, ambulatory patients, or both. Some restricted to first-episode DVT) | 3-mo probability of VTE      | 0.82 pooled event rate |                                                                                      | Johnson et al <sup>9</sup> /2010     |

(Continued)

**Table S22—Continued**

| Question from Structured Clinical Question Table | Clinical Situation/Question                                           | Meta-analysis vs Primary Study | Accuracy vs Management Cohort (Indicate if Cohort Is From an RCT) | IPD meta-analysis from 2 management cohort studies | Patient Population                                                                                                                   | Outcome Measure <sup>a</sup> | Result, % (95% CI)     | Comments | Reference                        |
|--------------------------------------------------|-----------------------------------------------------------------------|--------------------------------|-------------------------------------------------------------------|----------------------------------------------------|--------------------------------------------------------------------------------------------------------------------------------------|------------------------------|------------------------|----------|----------------------------------|
|                                                  | Negative single whole-leg US on day of presentation – if high pretest | Meta-analysis                  |                                                                   |                                                    | Clinically suspected DVT. (Analyzed studies included inpatients, ambulatory patients, or both. Some restricted to first-episode DVT) | 3-mo probability of VTE      | 2.49 pooled event rate |          | Johnson et al <sup>8</sup> /2010 |

See Table S1-S3, S7, and S19 legends for expansion of abbreviations.

<sup>a</sup>eg, Post-TP during 3 mo follow-up, sensitivity or specificity, and so forth.

**Table S23—[Sections 3.2-3.5] Description and Results of Diagnostic Studies Evaluating Whole-Leg US in First Suspected Lower Extremity DVT: RCTs**

| Question from Structured Clinical Question Table        | Study/Year                              | Patients                                                                                      | Intervention 1                                                                         | Intervention 2                             | Outcomes              | Results                                                          | Comments                                                                                                                                             |
|---------------------------------------------------------|-----------------------------------------|-----------------------------------------------------------------------------------------------|----------------------------------------------------------------------------------------|--------------------------------------------|-----------------------|------------------------------------------------------------------|------------------------------------------------------------------------------------------------------------------------------------------------------|
| Comparison of 2-point US based strategy vs whole-leg US | Bernardi et al et al <sup>2</sup> /2008 | Symptomatic outpatients                                                                       | 2-point proximal US followed by moderately sensitive DD (and repeat US if positive DD) | Whole-leg US, no further tests if negative | VTE in 3-mo follow-up | 0.9% vs 1.2%; absolute difference, - 0.3% (95% CI, - 1.4 to 0.8) | DVT diagnosed by noncompressibility and lack of augmentation (lack of increase in venous flow by Doppler with manual squeeze) in muscular calf veins |
|                                                         | Gibson et al et al <sup>1</sup> /2009   | Symptomatic patients with likely Wells score and/or positive highly sensitive DD (Tina-quant) | Serial 2-point proximal US                                                             | Whole-leg US, no further tests if negative | VTE in 3-mo follow-up | 2.0% vs 1.2%; absolute difference, - 0.8% (95% CI, - 1.8 to 3.4) | DVT diagnosed by noncompressibility                                                                                                                  |

See Table S1 and S2 legends for expansion of abbreviations.

**Table S24—[Sections 3.1-3.5] Outcome Events for Various Diagnostic Strategies According to Decision Analytic Modeling**

| Intervention<br>(All Patients/1,000 Cohort)                                                                                                                                                                                       | Average No. of Outcome Events Per 1,000 Patients (95% Credible Interval) |                  |                     |                                |                         |                            |                           |  | Venographic<br>Mortality |
|-----------------------------------------------------------------------------------------------------------------------------------------------------------------------------------------------------------------------------------|--------------------------------------------------------------------------|------------------|---------------------|--------------------------------|-------------------------|----------------------------|---------------------------|--|--------------------------|
|                                                                                                                                                                                                                                   | No. Treated                                                              | Fatal PE         | Nonfatal PE         | Intracranial<br>Bleeding Event | Fatal Bleeding<br>Event | Nonfatal<br>Bleeding Event | No Bleeding               |  |                          |
| No testing or treatment                                                                                                                                                                                                           | 0                                                                        | 3.77 (1.27-8.17) | 19.44 (11.90-28.39) | 0                              | 0                       | 0                          | 1,000                     |  | 0                        |
| Venography for all patients                                                                                                                                                                                                       | 209                                                                      | 0.65 (0.41-0.96) | 3.12 (2.42-4.15)    | 0.25 (0.13-0.42)               | 0.71 (0.48-0.99)        | 4.38 (3.54-5.38)           | 994.65<br>(993.53-995.60) |  | 0.03 (0.01-0.14)         |
| Proximal US; repeat if negative                                                                                                                                                                                                   | 245                                                                      | 0.76 (0.49-1.09) | 3.68 (2.91-4.70)    | 0.30 (0.15-0.49)               | 0.84 (0.58-1.15)        | 5.14 (4.26-6.24)           | 993.72<br>(992.49-994.76) |  | 0                        |
| Whole-leg US; repeat if distal<br>DVT found                                                                                                                                                                                       | 240                                                                      | 0.83 (0.51-1.31) | 4.06 (3.07-5.72)    | 0.29 (0.15-0.48)               | 0.82 (0.57-1.12)        | 5.03 (4.19-5.99)           | 993.86<br>(992.71-994.82) |  | 0                        |
| Whole-leg US; treat if distal<br>DVT found                                                                                                                                                                                        | 265                                                                      | 0.82 (0.51-1.28) | 4.01 (3.04-5.59)    | 0.32 (0.16-0.54)               | 0.91 (0.62-1.27)        | 5.50 (4.48-6.94)           | 993.18<br>(991.57-994.43) |  | 0                        |
| Proximal US, No repeat.                                                                                                                                                                                                           | 229                                                                      | 1.00 (0.56-1.85) | 4.94 (3.26-8.43)    | 0.28 (0.15-0.46)               | 0.78 (0.54-1.06)        | 4.81 (4.01-5.61)           | 994.13<br>(993.18-995.00) |  | 0                        |
| Wells score and proximal US. If<br>PTP low, discharge if US<br>negative, venogram if positive.<br>If PTP moderate, repeat US if<br>negative, treat if positive. If<br>high PTP, venogram if US<br>negative, treat if US positive. | 228                                                                      | 0.71 (0.45-1.06) | 3.43 (2.64-4.68)    | 0.28 (0.14-0.46)               | 0.78 (0.54-1.08)        | 4.79 (3.92-5.77)           | 994.15<br>(993.00-995.12) |  | 0.004 (0.00-0.02)        |
| Simplified DD and proximal<br>US. If US positive then treat.<br>If both are negative then<br>discharge. If DD positive and<br>US negative repeat US.                                                                              | 239                                                                      | 0.85 (0.51-1.35) | 4.14 (3.08-6.05)    | 0.29 (0.15-0.48)               | 0.82 (0.56-1.12)        | 5.02 (4.18-5.98)           | 993.88<br>(992.76-994.83) |  | 0                        |
| Wells score and proximal US. If<br>PTP high or moderate,<br>perform proximal US. If<br>positive treat, venogram if<br>negative. If PTP low, perform<br>US. If positive treat, discharge<br>if negative.                           | 249                                                                      | 0.68 (0.43-1.00) | 3.26 (2.50-4.47)    | 0.30 (0.16-0.49)               | 0.85 (0.59-1.17)        | 5.22 (4.36-6.26)           | 993.62<br>(992.41-994.63) |  | 0.01 (0.00-0.06)         |
| Wells score and full-leg US. If<br>PTP high or moderate,<br>perform full-leg US, treat if<br>positive, venogram if negative.<br>If PTP low, full-leg US, treat if<br>positive, discharge if negative.                             | 251                                                                      | 0.65 (0.42-0.94) | 3.11 (2.44-4.08)    | 0.30 (0.15-0.50)               | 0.86 (0.60-1.18)        | 5.27 (4.37-6.36)           | 993.57<br>(992.34-994.62) |  | 0.01 (0.00-0.06)         |

(Continued)

**Table S24—Continued**

| Intervention<br>(All Patients/1,000 Cohort)                                                                                                                                                                                                                                                                                                 | No. Treated | Average No. of Outcome Events Per 1,000 Patients (95% Credible Interval) |                  |                                            |                         |                                               |                           |                    | Venographic<br>Mortality |
|---------------------------------------------------------------------------------------------------------------------------------------------------------------------------------------------------------------------------------------------------------------------------------------------------------------------------------------------|-------------|--------------------------------------------------------------------------|------------------|--------------------------------------------|-------------------------|-----------------------------------------------|---------------------------|--------------------|--------------------------|
|                                                                                                                                                                                                                                                                                                                                             |             | Fatal PE                                                                 | Nonfatal PE      | Nonfatal<br>Intracranial<br>Bleeding Event | Fatal Bleeding<br>Event | Nonfatal<br>Nonintracranial<br>Bleeding Event | No Bleeding               |                    |                          |
| Quantitative latex DD; if positive, perform proximal US and repeat. If DD negative, perform Wells score. If high, perform proximal US and repeat if negative. If PTP moderate or low, discharge.                                                                                                                                            | 214         | 0.85 (0.53-1.26)                                                         | 4.13 (3.17-5.45) | 0.26 (0.13-0.43)                           | 0.73 (0.51-1.01)        | 4.50 (3.66-5.50)                              | 994.50<br>(993.37-995.45) | 0                  |                          |
| Quantitative latex DD; if positive, perform above-knee US and repeat. If DD negative perform Wells score. If PTP high perform proximal US. If PTP low or moderate, discharge.                                                                                                                                                               | 213         | 0.86 (0.53-1.32)                                                         | 4.22 (3.20-5.70) | 0.26 (0.13-0.43)                           | 0.73 (0.51-1.01)        | 4.49 (3.66-5.46)                              | 994.53<br>(993.40-995.47) | 0                  |                          |
| Wells score. If PTP high, proximal US; treat if positive, SimpliRED DD if negative. If DD positive, venogram; if negative, repeat US. If PTP moderate, US; treat if positive, SimpliRED DD if negative. If DD positive, repeat US. If DD negative, discharge. If PTP low, SimpliRED. If DD positive, proximal US. Discharge if DD negative. | 225         | 0.80 (0.49-1.27)                                                         | 3.90 (2.88-5.65) | 0.27 (0.14-0.44)                           | 0.77 (0.53-1.05)        | 4.72 (3.90-5.65)                              | 994.24<br>(993.17-995.20) | 0.0017 (0.00-0.01) |                          |
| Wells score and SimpliRED DD. If PTP high or moderate, or DD positive, perform full-leg US. If PTP low and DD negative, then discharge.                                                                                                                                                                                                     | 220         | 0.88 (0.53-1.40)                                                         | 4.29 (3.18-6.08) | 0.27 (0.14-0.44)                           | 0.75 (0.52-1.04)        | 4.61 (3.80-5.55)                              | 994.36<br>(993.33-995.29) | 0                  |                          |
| ELISA DD. If negative, discharge. If DD positive, perform proximal US. Treat if US positive. If US negative, perform Wells score. If PTP high, perform venogram. If PTP moderate or low, discharge.                                                                                                                                         | 214         | 0.90 (0.53-1.57)                                                         | 4.44 (3.07-7.18) | 0.26 (0.13-0.42)                           | 0.73 (0.51-0.99)        | 4.47 (3.71-5.31)                              | 994.53<br>(993.57-995.40) | 0.002 (0.00-0.01)  |                          |

(Continued)

**Table S24—Continued**

|                                                                                                                                                                                                                                                                 |             | Average No. of Outcome Events Per 1,000 Patients (95% Credible Interval) |                  |                             |                                |                      |                        |             |                       |
|-----------------------------------------------------------------------------------------------------------------------------------------------------------------------------------------------------------------------------------------------------------------|-------------|--------------------------------------------------------------------------|------------------|-----------------------------|--------------------------------|----------------------|------------------------|-------------|-----------------------|
| Intervention<br>(All Patients/1,000 Cohort)                                                                                                                                                                                                                     | No. Treated | Fatal PE                                                                 | Nonfatal PE      | Nonfatal                    |                                | Fatal Bleeding Event | Nonfatal               |             | Venographic Mortality |
|                                                                                                                                                                                                                                                                 |             | 0.82 (0.51-1.30)                                                         | 4.04 (3.04-5.67) | Intracranial Bleeding Event | Nonintracranial Bleeding Event | 0.82 (0.57-1.13)     | 5.08 (4.21-5.99)       | No Bleeding |                       |
| Wells score. If PTP high or moderate, perform proximal US. If positive treat, if negative perform SimpliRED DD. Repeat US if DD positive, discharge if DD negative. If PTP low, perform US. Discharge if negative, treat if positive.                           | 240         | 0.82 (0.51-1.30)                                                         | 4.04 (3.04-5.67) | 0.29 (0.15-0.48)            | 0.82 (0.57-1.13)               | 5.08 (4.21-5.99)     | 993.85 (992.71-994.82) | 0           |                       |
| Wells score. If PTP high or moderate, perform proximal US. If positive treat, if negative perform SimpliRED DD. Repeat US if DD positive and discharge if DD negative. If PTP low perform SimpliRED DD, discharge if negative, perform proximal US if positive. | 218         | 0.91 (0.54-1.49)                                                         | 4.65 (3.20-6.63) | 0.26 (0.14-0.43)            | 0.73 (0.52-1.02)               | 4.57 (3.79-5.47)     | 994.42 (993.39-995.32) | 0           |                       |
| Wells score. If PTP high, perform proximal US. If positive treat, if negative perform SimpliRED DD. Repeat US if DD positive, discharge if negative. If PTP low or moderate, perform SimpliRED DD. Discharge if negative, perform proximal US if positive.      | 195         | 1.06 (0.60-1.87)                                                         | 5.26 (3.67-8.08) | 0.24 (0.12-0.38)            | 0.67 (0.46-0.91)               | 4.09 (3.34-4.88)     | 995.12 (994.10-995.84) | 0           |                       |
| Wells score. If PTP high or moderate, perform proximal US. If positive treat, if negative repeat proximal US. If PTP low, perform proximal US, treat if positive, discharge if negative.                                                                        | 242         | 0.80 (0.50-1.18)                                                         | 3.90 (2.99-5.27) | 0.29 (0.15-0.48)            | 0.83 (0.57-1.14)               | 5.08 (4.23-6.09)     | 993.80 (992.62-994.81) | 0           |                       |

(Continued)

**Table S24—Continued**

| Intervention<br>(All Patients/1,000 Cohort)                                                                                                                                     | No. Treated | Average No. of Outcome Events Per 1,000 Patients (95% Credible Interval) |                  |                                            |                         |                                               |                           | Venographic<br>Mortality |
|---------------------------------------------------------------------------------------------------------------------------------------------------------------------------------|-------------|--------------------------------------------------------------------------|------------------|--------------------------------------------|-------------------------|-----------------------------------------------|---------------------------|--------------------------|
|                                                                                                                                                                                 |             | Fatal PE                                                                 | Nonfatal PE      | Nonfatal<br>Intracranial<br>Bleeding Event | Fatal Bleeding<br>Event | Nonfatal<br>Nonintracranial<br>Bleeding Event | No Bleeding               |                          |
| Wells score. If PTP high or moderate, perform proximal US. If positive treat, if negative repeat US. If PTP low, perform proximal US; treat if positive, discharge if negative. | 234         | 0.92 (0.54-1.57)                                                         | 4.50 (3.17-7.02) | 0.28 (0.15-0.47)                           | 0.80 (0.56-1.09)        | 4.92 (4.09-5.79)                              | 993.99<br>(992.99-994.89) | 0                        |
| Wells score. If PTP high or moderate, perform proximal US. Treat if positive; if negative discharge. If PTP low, discharge.                                                     | 194         | 1.19 (0.63-2.21)                                                         | 5.94 (3.89-9.49) | 0.24 (0.12-0.38)                           | 0.66 (0.46-0.90)        | 4.08 (3.34-4.84)                              | 995.02<br>(994-12-995.78) | 0                        |
| Perform SimpliRED DD. Discharge if negative, perform proximal US if positive. Treat if US positive, repeat US if initial US is negative                                         | 176         | 1.30 (0.69-2.25)                                                         | 6.49 (4.58-9.13) | 0.21 (0.11-0.35)                           | 0.60 (0.41-0.83)        | 3.70 (2.99-4.84)                              | 995.48<br>(994.55-996.27) | 0                        |

The model applies each strategy to a population with 19% prevalence of proximal DVT and 5% prevalence of distal DVT, using sensitivities and specificities derived from meta-analyses, to determine what proportion of patients with proximal, distal, and no DVT are treated with anticoagulant therapy. Untreated distal DVT are assumed to have a 21.4% probability of subsequent propagation to form proximal DVT, but do not directly cause PE. Patients with treated proximal DVT have a 0.3% probability of fatal PE and a 1.4% probability of nonfatal PE over the following 3 mo. The respective probabilities for untreated proximal DVT are 1.9% and 9.3%. Bleeding outcomes are assumed to be entirely due to anticoagulant therapy. Patients receiving treatment have a 0.3% probability of fatal bleeding, a 0.1% probability of nonfatal intracranial bleeding, and a 2.1% probability of major nonfatal non-intracranial bleeding. All parameters are modeled with a probability distribution to generate a credible range for the outcomes. See Table S1, S5, and S19 legends for expansion of abbreviations.



**Table S25—[Sections 3.1-3.5] Additional Outcome Events for Various Diagnostic Strategies Compared With Serial CUSs According to Decision Analytic Modeling**

| Intervention (All Patients/1,000 Cohort)                                                                                                                                                                                                                                                                          | Additional Number of Outcome Events Per 1,000 Patients Compared With Serial CUS |             |                                      |                      |                                         |             |
|-------------------------------------------------------------------------------------------------------------------------------------------------------------------------------------------------------------------------------------------------------------------------------------------------------------------|---------------------------------------------------------------------------------|-------------|--------------------------------------|----------------------|-----------------------------------------|-------------|
|                                                                                                                                                                                                                                                                                                                   | Fatal PE                                                                        | Nonfatal PE | Nonfatal Intracranial Bleeding Event | Fatal Bleeding Event | Nonfatal Nonintracranial Bleeding Event | No Bleeding |
| No testing or treatment                                                                                                                                                                                                                                                                                           | 3.02                                                                            | 15.76       | -0.30                                | -0.84                | -5.14                                   | 6.27        |
| Venography for all patients                                                                                                                                                                                                                                                                                       | -0.11                                                                           | -0.55       | -0.04                                | -0.12                | -0.75                                   | -0.92       |
| Proximal US; repeat if negative                                                                                                                                                                                                                                                                                   | 0                                                                               | 0           | 0                                    | 0                    | 0                                       | 0           |
| Whole-leg US; repeat if distal DVT found                                                                                                                                                                                                                                                                          | 0.07                                                                            | 0.39        | -0.01                                | -0.02                | -0.10                                   | 0.12        |
| Whole-leg US; treat if distal DVT found                                                                                                                                                                                                                                                                           | 0.06                                                                            | 0.34        | 0.03                                 | 0.07                 | 0.45                                    | -0.55       |
| Proximal US. No repeat.                                                                                                                                                                                                                                                                                           | 0.24                                                                            | 1.26        | -0.02                                | -0.05                | -0.33                                   | 0.40        |
| Wells score and proximal US. If PTP low, discharge if US negative; venogram if positive. If PTP moderate, repeat US if negative, treat if positive. If high PTP, venogram if US negative, treat if US positive.                                                                                                   | -0.05                                                                           | -0.24       | -0.02                                | -0.06                | -0.34                                   | 0.42        |
| SimpliRED DD and proximal US. If US positive then treat. If both are negative then discharge. If DD positive and US negative, repeat US.                                                                                                                                                                          | 0.09                                                                            | 0.46        | -0.01                                | -0.02                | -0.12                                   | 0.15        |
| Wells score and proximal US. If PTP high or moderate, perform proximal US. If positive treat, venogram if negative. If PTP low, perform proximal US. If positive treat, discharge if negative.                                                                                                                    | -0.08                                                                           | -0.41       | 0.01                                 | 0.01                 | 0.09                                    | -0.11       |
| Wells score and full leg US. If PTP high or moderate perform proximal US. If positive treat, venogram if negative. If PTP low, full-leg US, treat if positive, discharge if negative.                                                                                                                             | -0.11                                                                           | -0.57       | 0.01                                 | 0.02                 | 0.13                                    | -0.16       |
| Quantitative latex DD. If positive perform proximal US and repeat. If DD negative, perform Wells score. If high, perform proximal US and repeat if negative. If PTP moderate or low, discharge.                                                                                                                   | 0.09                                                                            | 0.46        | -0.04                                | -0.10                | -0.63                                   | 0.78        |
| Quantitative latex DD: if positive perform above-knee US and repeat. If DD negative, perform Wells score. If high perform proximal US. If PTP low or moderate, then discharge.                                                                                                                                    | 0.10                                                                            | 0.55        | -0.04                                | -0.11                | -0.65                                   | 0.80        |
| Wells score. If PTP high, proximal US; treat if positive, SimpliRED DD if negative. If DD positive, venogram, if negative, repeat US. If PTP moderate, US; treat if positive, SimpliRED if negative. If DD positive, repeat US; if DD negative, discharge. If PTP low, SimpliRED DD. If DD positive, proximal US. | 0.04                                                                            | 0.21        | -0.02                                | -0.07                | -0.42                                   | 0.51        |

(Continued)

**Table S25—Continued**

| Intervention (All Patients/1,000 Cohort)                                                                                                                                                                                                                       | Additional Number of Outcome Events Per 1,000 Patients Compared With Serial CUS |             |                                      |                      |                                         |             |
|----------------------------------------------------------------------------------------------------------------------------------------------------------------------------------------------------------------------------------------------------------------|---------------------------------------------------------------------------------|-------------|--------------------------------------|----------------------|-----------------------------------------|-------------|
|                                                                                                                                                                                                                                                                | Fatal PE                                                                        | Nonfatal PE | Nonfatal Intracranial Bleeding Event | Fatal Bleeding Event | Nonfatal Nonintracranial Bleeding Event | No Bleeding |
| Wells score and SimpliRED DD. If PTP high or moderate, or DD positive, perform full-leg US. If PTP low and DD negative, then discharge.                                                                                                                        | 0.12                                                                            | 0.61        | -0.03                                | -0.08                | -0.52                                   | 0.63        |
| ELISA DD. If negative, discharge. If DD positive, perform proximal US. Treat if US positive. If US negative, perform Wells score. If PTP high, perform venogram. If PTP moderate or low, discharge.                                                            | 0.15                                                                            | 0.77        | -0.04                                | -0.11                | -0.65                                   | 0.79        |
| Wells score. If PTP high or moderate, perform proximal US. If positive treat, if negative perform SimpliRED DD. Repeat US if DD positive, discharge if negative. If PTP low, perform US. Discharge if negative, treat if positive.                             | 0.07                                                                            | 0.37        | -0.005                               | -0.02                | -0.10                                   | 0.12        |
| Wells score. If PTP high or moderate, perform proximal US. If positive treat, if negative perform SimpliRED DD. Repeat US if DD positive, and discharge if DD negative. If PTP low, perform SimpliRED DD, discharge if negative and perform US if positive.    | 0.15                                                                            | 0.77        | -0.03                                | -0.09                | -0.56                                   | 0.69        |
| Wells score. If PTP high, perform proximal US. If positive treat, if negative, perform SimpliRED DD. Repeat US if DD positive, discharge if DD negative. If PTP moderate or low, perform SimpliRED DD. Discharge if negative, perform proximal US if positive. | 0.30                                                                            | 1.59        | -0.06                                | -0.17                | -1.05                                   | 1.28        |
| Wells score. If PTP high or moderate, perform proximal US. If positive treat, if negative repeat US. If PTP low, perform proximal US, treat if positive, discharge if negative.                                                                                | 0.04                                                                            | 0.23        | -0.003                               | -0.01                | -0.06                                   | 0.07        |
| Wells score. If PTP high, perform proximal US. If positive treat, if negative repeat US. If PTP moderate or low perform proximal US, if positive treat, if negative then discharge.                                                                            | 0.16                                                                            | 0.83        | -0.012                               | 3.67                 | -0.21                                   | 0.26        |
| Wells score. If PTP high or moderate, perform proximal US. Treat if positive, if negative discharge. If PTP low, discharge.                                                                                                                                    | 0.43                                                                            | 2.27        | -0.06                                | -0.17                | -1.05                                   | 1.28        |
| Perform SimpliRED DD. Discharge if negative, perform proximal US if positive. Treat if US positive, repeat US if initial US is negative                                                                                                                        | 0.54                                                                            | 2.81        | -0.08                                | -0.23                | -1.43                                   | 1.74        |

The model applies each strategy to a population with 19% prevalence of proximal DVT and 5% prevalence of distal DVT, using sensitivities and specificities derived from meta-analyses, to determine what proportion of patients with proximal, distal, and no DVT are treated with anticoagulant therapy. Untreated distal DVT are assumed to have a 21.4% probability of subsequent propagation to form proximal DVT, but do not directly cause PE. Patients with treated proximal DVT have a 0.3% probability of fatal PE and a 1.4% probability of nonfatal PE over the following 3 mo. The respective probabilities for untreated proximal DVT are 1.9% and 9.3%. Bleeding outcomes are assumed to be entirely due to anticoagulant therapy. Patients receiving treatment have a 0.3% probability of fatal bleeding, a 0.1% probability of nonfatal intracranial bleeding, and a 2.1% probability of major nonfatal non-intracranial bleeding. All parameters are modeled with a probability distribution to generate a credible range for the outcomes. See Table S1, S5, S7, and S19 legends for expansion of abbreviations.

**Table S26—[Sections 3.1-3.5] Additional Testing Maneuvers Compared With a Strategy Involving Serial CUSs According to Decision Analytic Modeling**

| Intervention (All Patients/1,000 Cohort)                                                                                                                                                                                                                                                                                                      | Number of Testing Maneuvers Per 1,000 Patients |              |              |          | Additional Tests Per 1,000 Patients |              |             |          |
|-----------------------------------------------------------------------------------------------------------------------------------------------------------------------------------------------------------------------------------------------------------------------------------------------------------------------------------------------|------------------------------------------------|--------------|--------------|----------|-------------------------------------|--------------|-------------|----------|
|                                                                                                                                                                                                                                                                                                                                               | Wells Score                                    | Proximal CUS | Whole-Leg US | DD Tests | Venogram                            | Proximal CUS | Wells Score | DD Tests |
| No testing or treatment                                                                                                                                                                                                                                                                                                                       | 0                                              | 0            | 0            | 0        | 0                                   | -1,771       | 0           | 0        |
| Venography for all patients                                                                                                                                                                                                                                                                                                                   | 0                                              | 0            | 0            | 0        | 1,000                               | -1,771       | 0           | 0        |
| Proximal US. Repeat if negative.                                                                                                                                                                                                                                                                                                              | 0                                              | 1,771        | 0            | 0        | 0                                   | 0            | 0           | 0        |
| Whole-leg US. Repeat if distal found.                                                                                                                                                                                                                                                                                                         | 0                                              | 39           | 1,000        | 0        | 0                                   | -1,732       | 0           | 0        |
| Whole-leg US. Treat if distal DVT found.                                                                                                                                                                                                                                                                                                      | 0                                              | 0            | 1,000        | 0        | 0                                   | -1,771       | 0           | 0        |
| Proximal US. No repeat.                                                                                                                                                                                                                                                                                                                       | 0                                              | 1,000        | 0            | 0        | 0                                   | -771         | 0           | 0        |
| Wells score and proximal US. If PTP low, discharge if US negative; venogram if positive. If PTP moderate, repeat US if negative. If high PTP, venogram if negative, treat if positive.                                                                                                                                                        | 1,000                                          | 1,347        | 0            | 0        | 138                                 | -424         | 1,000       | 0        |
| Simplified DD and proximal US. If US positive, then treat. If both are negative, then discharge. If DD positive and US negative, repeat US.                                                                                                                                                                                                   | 0                                              | 1,244        | 0            | 1,000    | 0                                   | -527         | 0           | 1,000    |
| Wells score and proximal US. If PTP high or moderate, perform proximal US. If positive treat, venogram if negative. If PTP low, perform proximal US, if positive treat, if negative discharge.                                                                                                                                                | 1,000                                          | 1,081        | 0            | 0        | 422                                 | -690         | 1,000       | 0        |
| Wells score and full-leg US. If PTP high or moderate, perform full-leg US; treat if positive, venogram if negative. If PTP low, full-leg US; treat if positive, discharge if negative.                                                                                                                                                        | 1,000                                          | 91           | 1,000        | 0        | 390                                 | -680         | 1,000       | 0        |
| Quantitative latex DD. If positive, perform proximal US and repeat. If DD negative, perform Wells score. If high, perform proximal US and repeat if negative. If PTP moderate or low, then discharge.                                                                                                                                         | 458                                            | 975          | 0            | 1,000    | 0                                   | -796         | 458         | 1,000    |
| Quantitative latex DD. If positive perform above-knee US and repeat. If DD negative, perform Wells score. If PTP high, perform proximal US. If PTP low or moderate, then discharge.                                                                                                                                                           | 458                                            | 938          | 0            | 1,000    | 0                                   | -833         | 458         | 1,000    |
| Wells score. If PTP high, proximal US; treat if positive, Simplified DD if negative. If DD positive, venogram if negative, repeat US; if DD negative, discharge. If PTP low, Simplified. If PTP moderate, US treat if positive, Simplified DD if negative. If DD positive, repeat US; if negative, then discharge. If PTP low, Simplified DD. | 1,000                                          | 890          | 0            | 806      | 55                                  | -881         | 1,000       | 806      |
| Wells score and Simplified DD. If PTP high or moderate, or DD positive, perform full-leg US. If PTP low and DD negative, then discharge.                                                                                                                                                                                                      | 1,000                                          | 36           | 709          | 1,000    | 0                                   | -1,026       | 1,000       | 1,000    |
| ELISA DD. If negative, discharge. If positive, perform proximal US. Treat if US positive; if US negative, perform Wells score. If PTP high, perform venogram. If PTP low or moderate, then discharge.                                                                                                                                         | 429                                            | 654          | 0            | 1,000    | 74                                  | -1,117       | 429         | 1,000    |

(Continued)

**Table S26—Continued**

| Intervention (All Patients/1,000 Cohort)                                                                                                                                                                                                                      | Number of Testing Maneuvers Per 1,000 Patients |              |              |          |          | Additional Tests Per 1,000 Patients |             |          |
|---------------------------------------------------------------------------------------------------------------------------------------------------------------------------------------------------------------------------------------------------------------|------------------------------------------------|--------------|--------------|----------|----------|-------------------------------------|-------------|----------|
|                                                                                                                                                                                                                                                               | Wells Score                                    | Proximal CUS | Whole-Leg US | DD Tests | Venogram | Proximal CUS                        | Wells Score | DD Tests |
| Wells score. If PTP high or moderate, perform proximal US. If positive treat, if negative perform SimpliRED DD. Repeat US if DD negative, discharge if negative. If PTP low, perform US; discharge if negative, treat if positive.                            | 1,000                                          | 1,258        | 0            | 422      | 0        | -513                                | 1,000       | 422      |
| Wells score. If PTP high or moderate, perform proximal US. If positive treat, if negative perform SimpliRED DD. Repeat US if DD negative, discharge if DD negative. If PTP low, perform SimpliRED DD, discharge if negative, perform proximal US if positive. | 1,000                                          | 876          | 0            | 806      | 0        | -895                                | 1,000       | 806      |
| Wells score. If PTP high, perform proximal US. If positive treat, if negative perform SimpliRED DD. Repeat US if DD positive, discharge if negative, perform proximal US if negative.                                                                         | 1,000                                          | 537          | 0            | 871      | 0        | -1,234                              | 1,000       | 871      |
| Wells score. If PTP high or moderate, perform proximal US. If positive treat, if negative, repeat US. If PTP low, perform proximal US; treat if positive, discharge if negative.                                                                              | 1,000                                          | 1,422        | 0            | 0        | 0        | -349                                | 1,000       | 0        |
| Wells score. If PTP high, perform proximal US. If positive treat, if negative repeat US. If PTP low, perform proximal US; treat if positive, discharge if negative.                                                                                           | 1,000                                          | 1,103        | 0            | 0        | 0        | -668                                | 1,000       | 0        |
| Wells score. If PTP high or moderate, perform proximal US. Treat if positive, if negative, discharge. If PTP low discharge.                                                                                                                                   | 1,000                                          | 616          | 0            | 0        | 0        | -1,155                              | 1,000       | 0        |
| Perform SimpliRED DD. Discharge if negative, perform proximal US if positive. Treat if US positive, repeat US if initial US is negative                                                                                                                       | 0                                              | 656          | 0            | 1,000    | 0        | -1,115                              | 0           | 1,000    |

See Table S1 and S7 legends for expansion of abbreviations.

**Table S27—[Sections 3.2-3.6] Methodology of Diagnostic Studies Evaluating CT Scan Venography in Patients With Suspected First Lower Extremity DVT: Meta-analysis of Accuracy Studies of CT Scan Venography**

| Study Eligibility             |                    |                              | Exploration of Heterogeneity                                                     | Comments                                                                                                                                                                            | Source                                 |
|-------------------------------|--------------------|------------------------------|----------------------------------------------------------------------------------|-------------------------------------------------------------------------------------------------------------------------------------------------------------------------------------|----------------------------------------|
| Patient Population            | Diagnostic Test    | Outcome (Criterion Standard) |                                                                                  |                                                                                                                                                                                     |                                        |
| Suspected DVT or suspected PE | CT scan venography | US or contrast venography    | $\chi^2$ test for heterogeneity. No formal analysis for sources of heterogeneity | Most of the primary studies were of patients with suspected PE and used US as a reference standard. Summary estimates were calculated despite significant unexplained heterogeneity | Thomas et al et al <sup>80</sup> /2008 |

See Table S1 and S5 legends for expansion of abbreviations.

**Table S28—[Sections 3.2-3.6] Methodology of Diagnostic Studies Evaluating CT Scan Venography in Patients With Suspected First Lower Extremity DVT: Individual Accuracy Studies of CT Scan Venography**

| Study/Year                              | Patient Population              | Study Details      |                              |                      | Independent Test Assessment | Comments                               |
|-----------------------------------------|---------------------------------|--------------------|------------------------------|----------------------|-----------------------------|----------------------------------------|
|                                         |                                 | Diagnostic Test    | Outcome (Criterion Standard) | Consecutive Patients |                             |                                        |
| Byun et al <sup>S1</sup> /2005          | Asymptomatic, Post-arthroplasty | CT scan venography | US                           | No                   | Yes                         |                                        |
| Rhee et al <sup>S2</sup> /2007          | Suspected PE                    | CT scan venography | US                           | No                   | Yes                         |                                        |
| Goodman et al <sup>S3</sup> /2007       | Suspected PE                    | CT scan venography | US                           | Yes                  | Yes                         |                                        |
| Garcia-Bolado et al <sup>S4</sup> /2007 | Suspected PE                    | CT scan venography | US                           | Yes                  | Yes                         |                                        |
| Kim et al <sup>S5</sup> /2004           | Suspected PE and DVT            | CT scan venography | US                           | Unclear              | Yes                         | Included in Thomas et al <sup>S6</sup> |
| Lim et al <sup>S6</sup> /2004           | Suspected PE                    | CT scan venography | US                           | Yes                  | Yes                         | Included in Thomas et al <sup>S6</sup> |
| Lim et al <sup>S6</sup> /2004           | Suspected PE                    | CT scan venography | US                           | Yes                  | Yes                         | Included in Thomas et al <sup>S6</sup> |
| Begeman et al <sup>S5</sup> /2003       | Suspected PE                    | CT scan venography | US                           | No                   | Yes                         |                                        |
| Loud et al <sup>S9</sup> /2001          | Suspected PE                    | CT scan venography | US                           | Yes                  | Yes                         | Included in Thomas et al <sup>S6</sup> |
| Peterson et al <sup>S6</sup> /2001      | Suspected PE                    | CT scan venography | US                           | No                   | Yes                         | Included in Thomas et al <sup>S6</sup> |
| Yoshida et al <sup>S1</sup> /2001       | Suspected DVT                   | CT scan venography | US                           | Yes                  | Yes                         | Included in Thomas et al <sup>S6</sup> |
| Chaye et al <sup>S2</sup> /2000         | Suspected PE                    | CT scan venography | US                           | No                   | Yes                         | Included in Thomas et al <sup>S6</sup> |
| Cham et al <sup>S3</sup> /2000          | Suspected PE                    | CT scan venography | US                           | Yes                  | Unclear                     | Included in Thomas et al <sup>S6</sup> |
| Garg et al <sup>S4</sup> /2000          | Suspected PE                    | CT scan venography | US                           | Yes                  | Yes                         | Included in Thomas et al <sup>S6</sup> |
| Coche et al <sup>S5</sup> /2000         | Suspected PE                    | CT scan venography | US                           | Yes                  | Yes                         | Included in Thomas et al <sup>S6</sup> |
| Duwe et al <sup>S6</sup> /2000          | Suspected PE                    | CT scan venography | US                           | Unclear              | Unclear                     | Included in Thomas et al <sup>S6</sup> |
| Shah et al <sup>S7</sup> /1999          | Suspected PE and DVT            | CT scan venography | US                           | Unclear              | Unclear                     | Included in Thomas et al <sup>S6</sup> |
| Baldt et al <sup>S8</sup> /1996         | Suspected DVT                   | CT scan venography | Contrast venography          | Yes                  | Yes                         | Included in Thomas et al <sup>S6</sup> |

See Table S1 and S5 legends for expansion of abbreviations.

**Table S29—[Sections 3.2-3.6] Description and Results of Diagnostic Studies Evaluating CT Scan Venography in Patients With Suspected First Lower Extremity DVT: Meta-Analyses and Cross-sectional Accuracy Studies of CT Scan Venography**

| Question from Structured Clinical Question Table                       | Clinical Situation/Question | Meta-analysis vs Primary Study | Accuracy vs Management Cohort | Patient Population             | Outcome Measure  | Result, % (95% CI)                                                                     | Comments                                                                               | Reference                               |
|------------------------------------------------------------------------|-----------------------------|--------------------------------|-------------------------------|--------------------------------|------------------|----------------------------------------------------------------------------------------|----------------------------------------------------------------------------------------|-----------------------------------------|
| What are the consequences of using CT scan venography to diagnose DVT? | Suspected DVT               | Meta-analysis                  | Accuracy                      | Mixed, but mostly suspected PE | Specificity      | Summary estimate: 95.2<br>(93.6-96.5)<br>Range, 93-100                                 |                                                                                        | Thomas et al <sup>89</sup> /2008        |
|                                                                        | Suspected DVT               | Primary study                  | Accuracy                      | Asymptomatic                   | Specificity      | 96.9 (84.3-99.4)                                                                       |                                                                                        | Byun et al <sup>81</sup> /2008          |
|                                                                        | Suspected DVT               | Primary study                  | Accuracy                      | Suspected PE                   | Specificity      | 95.0 (90.8-97.5)                                                                       |                                                                                        | Garcia-Bolado et al <sup>84</sup> /2007 |
|                                                                        | Suspected DVT               | Primary study                  | Accuracy                      | Suspected PE                   | Specificity      | 97.2 (95.6-98.3)                                                                       | Results were reported as agreement between CT scan and US, rather than US as reference | Goodman et al <sup>83</sup> /2007       |
|                                                                        | Suspected DVT               | Primary study                  | Accuracy                      | Suspected PE                   | Specificity      | 92.6 (85.6-96.4)                                                                       | Results were reported as agreement between CT scan and US, rather than US as reference | Rhee et al <sup>82</sup> /2007          |
|                                                                        | Suspected DVT               | Primary study                  | Accuracy                      | Suspected PE                   | Specificity      | 96.7 (83.3-99.4)                                                                       |                                                                                        | Begeman et al <sup>85</sup> /2003       |
|                                                                        | Suspected DVT               | Meta-analysis                  | Accuracy                      | Mixed, but mostly suspected PE | Sensitivity      | Summary estimate: 95.9<br>(93.0-97.8)<br>Range: 71-100                                 |                                                                                        | Thomas et al <sup>89</sup> /2008        |
|                                                                        | Suspected DVT               | Primary study                  | Accuracy                      | Asymptomatic                   | Sensitivity      | 90.0 (74.4-96.5)                                                                       |                                                                                        | Byun et al <sup>81</sup> /2008          |
|                                                                        | Suspected DVT               | Primary study                  | Accuracy                      | Suspected PE                   | Sensitivity      | 58.8 (40.8-74.9)                                                                       |                                                                                        | Garcia-Bolado et al <sup>84</sup> /2007 |
|                                                                        | Suspected DVT               | Primary study                  | Accuracy                      | Suspected PE                   | Sensitivity      | 84.4 (75.8-90.3)                                                                       | Results were reported as agreement between CT scan and US, rather than US as reference | Goodman et al <sup>83</sup> /2007       |
| Suspected DVT                                                          | Primary study               | Accuracy                       | Suspected PE                  | Sensitivity                    | 72.3 (43.4-90.3) | Results were reported as agreement between CT scan and US, rather than US as reference | Rhee et al <sup>82</sup> /2007                                                         |                                         |
| Suspected DVT                                                          | Primary study               | Accuracy                       | Suspected PE                  | Sensitivity                    | 100 (74.1-100)   |                                                                                        | Begeman et al <sup>85</sup> /2003                                                      |                                         |

See Table S1 and S5 legends for expansion of abbreviations.

**Table S30—[Sections 3.2-3.6] Evidence Profile: Should CT Scan Venography Be Used for the Diagnosis of First Suspected DVT?**

| Outcome                                                       | No. of Studies                                                                 | Study Design    | Limitations <sup>a</sup> | Inconsistency <sup>b</sup> | Indirectness <sup>c</sup> | Imprecision <sup>d</sup> | Final Quality | Effect/1,000 <sup>e</sup>                      |
|---------------------------------------------------------------|--------------------------------------------------------------------------------|-----------------|--------------------------|----------------------------|---------------------------|--------------------------|---------------|------------------------------------------------|
| True positive (patients with DVT)                             | Meta-analysis of 13, plus 5 additional primary studies <sup>f,25,129,133</sup> | Accuracy cohort | Serious                  | Moderate                   | Serious                   | Moderate                 | Low           | Prev 53%: 508<br>Prev 17%: 163<br>Prev 5%: 48  |
| True negative (patients without DVT)                          |                                                                                |                 |                          |                            |                           |                          |               | Prev 53%: 447<br>Prev 17%: 790<br>Prev 5%: 904 |
| False negative (patients incorrectly classified DVT negative) |                                                                                |                 |                          |                            |                           |                          |               | Prev 53%: 22<br>Prev 17%: 7<br>Prev 5%: 2      |
| False positive (patients incorrectly classified DVT positive) |                                                                                |                 |                          |                            |                           |                          |               | Prev 53%: 23<br>Prev 17%: 40<br>Prev 5%: 46    |

Bibliography: Thomas SM, Goodacre SW, Sampson FC, et al. Diagnostic value of CT for deep vein thrombosis: results of a systematic review and meta-analysis. *Clin Radiol*. 2008;63(3):299-304. Byun SS, Kim JH, Kim YJ, et al. Evaluation of deep vein thrombosis with multidetector row CT after orthopedic arthroplasty: a prospective study for comparison with Doppler sonography. *Korean J Radiol*. 2008;9(1):59-66. Rhee KH, Iyer RS, Cha S, et al. Benefit of CT venography for the diagnosis of thromboembolic disease. *Clin Imaging*. 2007;31(4):253-258. Goodman LR, Stein PD, Matta F, et al. CT venography and compression sonography are diagnostically equivalent: data from PLOPED II. *AJR Am J Roentgenol*. 2007;189(5):1071-1076. Garcia-Bolado A, Del Cura JL. CT venography vs ultrasound in the diagnosis of thromboembolic disease in patients with clinical suspicion of pulmonary embolism. *Emerg Radiol*. 2007;14(6):403-409. Begemann PC, Bonacker M, Kemper J, et al. Evaluation of the deep venous system in patients with suspected pulmonary embolism with multi-detector CT: a prospective study in comparison to Doppler sonography. *J Comput Assist Tomogr*. 2003;27(3):399-409. Setting: predominantly suspected PE. Reference test: predominantly single US. See Table S1 and S5 legends for expansion of abbreviations.

<sup>a</sup>Most used a single US as a reference standard.

<sup>b</sup>Significant heterogeneity between studies.

<sup>c</sup>Few studies in suspected DVT; most in suspected PE. No management studies.

<sup>d</sup>Reported specificities range from 93%-100%; reported sensitivities range from 59%-100%.

<sup>e</sup>Based on a combined summary specificity of 95.2% (95% CI, 93.6%-96.5%) and sensitivity of 95.9% (95% CI, 93.0%-97.8%). Prevalences for high (53%), moderate (17%), and low (5%) taken from Wells et al.<sup>30</sup>



**Table S31—[Sections 3.2-3.6] Methodology of Diagnostic Studies Evaluating MR Venography in Patients With Suspected First DVT: Meta-analysis of Accuracy Studies of MR Venography or Direct Thrombus Imaging**

| Study Eligibility                                               |                              |                              | Exploration of Heterogeneity                                                      | Comments                                                                                                                        | Source                            |
|-----------------------------------------------------------------|------------------------------|------------------------------|-----------------------------------------------------------------------------------|---------------------------------------------------------------------------------------------------------------------------------|-----------------------------------|
| Patient Population                                              | Diagnostic Test              | Outcome (Criterion Standard) |                                                                                   |                                                                                                                                 |                                   |
| Suspected DVT, suspected PE, or high-risk asymptomatic patients | MR venography and direct MRI | US or contrast venography    | $\chi^2$ test for heterogeneity. No formal analysis for sources of heterogeneity. | Summary estimates were calculated despite significant unexplained heterogeneity. Prevalence of DVT was high in primary studies. | Sampson et al <sup>99</sup> /2007 |

See Table S1 and S5 legends for expansion of abbreviations.

**Table S32—[Sections 3.2-3.6] Methodology of Diagnostic Studies Evaluating MR Venography in Patients With Suspected First DVT: Individual Accuracy Studies of MR Venography**

| Study/Year                           | Study Details                              |                 |                              |                      |         | Independent Test Assessment             | Comments |
|--------------------------------------|--------------------------------------------|-----------------|------------------------------|----------------------|---------|-----------------------------------------|----------|
|                                      | Patient Population                         | Diagnostic Test | Outcome (Criterion Standard) | Consecutive Patients | Outcome |                                         |          |
| Cantwell et al <sup>100</sup> /2006  | Suspected DVT                              | MR venography   | Contrast venography          | No                   | Yes     | Included in Sampson et al <sup>99</sup> |          |
| Fraser et al <sup>101</sup> /2003    | Suspected DVT                              | MR venography   | Contrast venography          | No                   | Yes     | Included in Sampson et al <sup>99</sup> |          |
| Sica et al <sup>102</sup> /2001      | Suspected DVT, with negative above-knee US | MR venography   | Contrast venography          | No                   | Yes     | Included in Sampson et al <sup>99</sup> |          |
| Jensen et al <sup>103</sup> /2001    | Asymptomatic, lower limb injuries          | MR venography   | Contrast venography          | Yes                  | Yes     | Included in Sampson et al <sup>99</sup> |          |
| Catalano et al <sup>104</sup> /1997  | Suspected DVT                              | MR venography   | Contrast venography          | Unclear              | Yes     | Included in Sampson et al <sup>99</sup> |          |
| Laissy et al <sup>105</sup> /1996    | Suspected DVT/PE                           | MR venography   | Contrast venography          | Unclear              | Yes     | Included in Sampson et al <sup>99</sup> |          |
| Larcom et al <sup>106</sup> /1996    | Asymptomatic, post-arthroplasty            | MR venography   | Contrast venography          | Yes                  | Yes     | Included in Sampson et al <sup>99</sup> |          |
| Evans et al <sup>107</sup> /1996     | Suspected DVT                              | MR venography   | US                           | No                   | Yes     | Included in Sampson et al <sup>99</sup> |          |
| Evans et al <sup>108</sup> /1993     | Suspected DVT                              | MR venography   | Contrast venography          | Unclear              | Yes     | Included in Sampson et al <sup>99</sup> |          |
| Carpenter et al <sup>109</sup> /1993 | Suspected DVT                              | MR venography   | Contrast venography          | Unclear              | Yes     | Included in Sampson et al <sup>99</sup> |          |
| Spritzer et al <sup>110</sup> /1993  | Suspected DVT                              | MR venography   | Contrast venography          | Yes                  | Yes     | Included in Sampson et al <sup>99</sup> |          |
| Pope et al <sup>111</sup> /1991      | Suspected DVT                              | MR venography   | Contrast venography          | Unclear              | Yes     | Included in Sampson et al <sup>99</sup> |          |
| Vukov et al <sup>112</sup> /1991     | Suspected DVT                              | MR venography   | Contrast venography          | Yes                  | Yes     | Included in Sampson et al <sup>99</sup> |          |
| Erdman et al <sup>113</sup> /1990    | Suspected DVT                              | MR venography   | Contrast venography          | Yes                  | Yes     | Included in Sampson et al <sup>99</sup> |          |

See Table S1 and S5 legends for expansion of abbreviations.

**Table S33—[Sections 3.2-3.6] Description and Summary of Results of Diagnostic Studies Evaluating MR Venography in Patients With Suspected First DVT: Results: Meta-analyses and Cross-Sectional Accuracy Studies of MR Venography**

| Question from Structured Clinical Question Table                           | Clinical Situation/ Question | Meta-analysis vs Primary Study | Accuracy vs Management Cohort | Patient Population              | Outcome Measure | Result, %                                                     | Comments                                                                                                                                                                                                                                                                                                                         | Reference                           |
|----------------------------------------------------------------------------|------------------------------|--------------------------------|-------------------------------|---------------------------------|-----------------|---------------------------------------------------------------|----------------------------------------------------------------------------------------------------------------------------------------------------------------------------------------------------------------------------------------------------------------------------------------------------------------------------------|-------------------------------------|
| What are the consequences of using contrast MR venography to diagnose DVT? | Suspected DVT                | Meta-analysis                  | Accuracy                      | Mixed, but mostly suspected DVT | Specificity     | Summary estimate: 94.8 (95% CI, 92.6-96.5)<br>Range: 43-100   | Technique not always clear in primary studies. Included one study of direct MRI                                                                                                                                                                                                                                                  | Sampson et al <sup>109</sup> /2007  |
|                                                                            | Suspected DVT                | Primary study                  | Accuracy                      | Suspected DVT                   | Specificity     | 77.8 (95% CI, 54.8-91.0)                                      | Results were reported as agreement between MR venography and contrast venography, rather than contrast venography as reference                                                                                                                                                                                                   | Cantwell et al <sup>109</sup> /2006 |
| What are the consequences of using contrast MR venography to exclude DVT?  | Suspected DVT                | Meta-analysis                  | Accuracy                      | Mixed, but mostly suspected DVT | Sensitivity     | Summary estimate: 91.5 (95% CI, 87.5-94.5)<br>Range: 0 to 100 | Technique not always clear in primary studies. Included one study of direct MRI.<br>Sensitivity was lower in two studies of asymptomatic patients. When these were excluded, summary sensitivity was 95.7%.<br>Pooled sensitivities for proximal and distal DVT were 93.9% (95% CI: 88.8%-97.2%) and 62.1% (95% CI: 42.3%-79.3%) | Sampson et al <sup>109</sup> /2007  |
|                                                                            | Suspected DVT                | Primary study                  | Accuracy                      | Suspected DVT                   | Sensitivity     | 100% (95% CI, 61.0-100)                                       | Results were reported as agreement between MR venography and contrast venography, rather than contrast venography as reference                                                                                                                                                                                                   | Cantwell et al <sup>109</sup> /2006 |

**Table S34—[Sections 3.2-3.6] Evidence Profile: Should MR Venography Be Used for the Diagnosis of First Suspected DVT?**

| Outcome                                                       | No. of Studies                                                         | Study Design    | Limitations <sup>a</sup> | Inconsistency <sup>b</sup> | Indirectness <sup>c</sup> | Imprecision <sup>d</sup> | Final Quality | Effect/1,000 <sup>e</sup>                      |
|---------------------------------------------------------------|------------------------------------------------------------------------|-----------------|--------------------------|----------------------------|---------------------------|--------------------------|---------------|------------------------------------------------|
| True positive (patients with DVT)                             | Meta-analysis of 13 plus 1 additional primary study <sup>4,41,45</sup> | Accuracy cohort | ...                      | Moderate                   | Moderate                  | Serious                  | Low           | Prev 53%: 486<br>Prev 17%: 158<br>Prev 5%: 46  |
| True negative (patients without DVT)                          |                                                                        |                 |                          |                            |                           |                          |               | Prev 53%: 446<br>Prev 17%: 787<br>Prev 5%: 901 |
| False negative (patients incorrectly classified DVT negative) |                                                                        |                 |                          |                            |                           |                          |               | Prev 53%: 45<br>Prev 17%: 14<br>Prev 5%: 4     |
| False positive (patients incorrectly classified DVT positive) |                                                                        |                 |                          |                            |                           |                          |               | Prev 53%: 24<br>Prev 17%: 43<br>Prev 5%: 49    |

Bibliography: Sampson FC, Goodacre SW, Thomas SM, et al. The accuracy of MRI in diagnosis of suspected deep vein thrombosis: systematic review and meta-analysis. *Eur Radiol.* 2007;17(1):175-181. Cantwell CP, Craddock A, Bruzzi J, et al. MR venography with true fast imaging with steady-state precession for suspected lower-limb deep vein thrombosis. *J Vasc Interv Radiol.* 2006;17(11 pt 1):1763-1769. Setting: predominantly suspected DVT. Reference test: predominantly contrast venography.

<sup>a</sup>No major limitations.

<sup>b</sup>Significant heterogeneity between studies.

<sup>c</sup>No management studies.

<sup>d</sup>Reported specificities range from 43%-100%; reported sensitivities range from 0-100%.

<sup>e</sup>Based on a combined summary specificity of 94.8% (95% CI, 92.6%-96.5%) and sensitivity of 91.5% (95% CI, 87.5%-94.5%). Prevalences for high (53%), moderate (17%), and low (5%) taken from Wells et al.<sup>10</sup>

**Table S35—[Sections 3.2-3.6] Methodology of Diagnostic Studies Evaluating MR Direct Thrombus Imaging in Patients with Suspected First DVT: Individual Accuracy Studies of MR Direct Thrombus Imaging**

| Study/Year                       | Study Details      |                 |                              | Consecutive Patients | Independent Test Assessment | Comments                                      |
|----------------------------------|--------------------|-----------------|------------------------------|----------------------|-----------------------------|-----------------------------------------------|
|                                  | Patient Population | Diagnostic Test | Outcome (Criterion Standard) |                      |                             |                                               |
| Fraser et al <sup>14</sup> /2002 | Suspected DVT      | Direct MRI      | Contrast venography          | No                   | Yes                         | Included in Sampson et al <sup>99</sup> /2007 |

**Table S36—[Sections 3.2-3.6] Description and Results of Diagnostic Studies Evaluating MR Direct Thrombus Imaging in Patients With Suspected First DVT: Cross-Sectional Accuracy Studies of MR Direct Thrombus Imaging**

| Question From Structured Clinical Question Table                               | Clinical Situation/ Question | Meta-analysis vs Primary Study | Accuracy vs Management Cohort (Indicate if Cohort is From an RCT) | Patient Population | Outcome Measure <sup>a</sup> | Result, % (95% CI) | Comments                                              | Reference                        |
|--------------------------------------------------------------------------------|------------------------------|--------------------------------|-------------------------------------------------------------------|--------------------|------------------------------|--------------------|-------------------------------------------------------|----------------------------------|
| What are the consequences of using MR direct thrombus imaging to diagnose DVT? | Suspected DVT                | Primary study                  | Accuracy                                                          | Suspected DVT      | Specificity                  | 92 (80-98)         | Included in Sampson et al <sup>69</sup> meta-analysis | Fraser et al <sup>14</sup> /2002 |
| What are the consequences of using MR direct thrombus imaging to exclude DVT?  | Suspected DVT                | Primary study                  | Accuracy                                                          | Suspected DVT      | Sensitivity                  | 94 (84-97)         | Included in Sampson et al <sup>69</sup> meta-analysis | Fraser et al <sup>69</sup> /2002 |

See Table S2 legend for expansion of abbreviation.

<sup>a</sup>eg, Post-TP during 3 mo follow-up; sensitivity or specificity, and so forth.

**Table S37—[Sections 3.2-3.6] Evidence Profile: Should Direct MRI Be Used for the Diagnosis of First Suspected DVT?**

| Outcome                                                       | No. of Studies                 | Study Design    | Limitations <sup>a</sup> | Inconsistency <sup>b</sup> | Indirectness <sup>c</sup> | Imprecision <sup>d</sup> | Final Quality | Effect/1,000 <sup>e</sup>                      |
|---------------------------------------------------------------|--------------------------------|-----------------|--------------------------|----------------------------|---------------------------|--------------------------|---------------|------------------------------------------------|
| True positive (patients with DVT)                             | 1 Primary study <sup>159</sup> | Accuracy cohort | ...                      | Not applicable             | Moderate                  | Moderate                 | Low           | Prev 53%: 498<br>Prev 17%: 160<br>Prev 5%: 47  |
| True negative (patients without DVT)                          |                                |                 |                          |                            |                           |                          |               | Prev 53%: 432<br>Prev 17%: 764<br>Prev 5%: 874 |
| False negative (patients incorrectly classified DVT negative) |                                |                 |                          |                            |                           |                          |               | Prev 53%: 32<br>Prev 17%: 10<br>Prev 5%: 3     |
| False positive (patients incorrectly classified DVT positive) |                                |                 |                          |                            |                           |                          |               | Prev 53%: 38<br>Prev 17%: 66<br>Prev 5%: 76    |

Bibliography: Fraser DG, Moody AR, Morgan PS, Martel AL, Davidson I. Diagnosis of lower-limb deep venous thrombosis: a prospective blinded study of magnetic resonance direct thrombus imaging. *Ann Intern Med.* 2002;136(2):89-98. Setting: suspected DVT. Reference test: venography.

<sup>a</sup>No significant limitations

<sup>b</sup>Only one study

<sup>c</sup>No management studies.

<sup>d</sup>Reported specificities range from 93%-100%; reported sensitivities range from 59%-100%.

<sup>e</sup>Based on a specificity of 92% (95% CI, 80%-98%) and sensitivity of 94.9% (95% CI, 84%-97%). Prevalences for high (53%), moderate (17%), and low (5%) taken from Wells et al.<sup>30</sup>

**Table S38—[Sections 4.1-4.3] Methodology of Diagnostic Studies in Patients With Suspected Recurrent Lower Extremity DVT: Individual Accuracy Studies**

| Study Details           |                                                                              |                              |                      |                             |                                                                                                                                                               |                                                                                                                                                                                                                                                                                                        |
|-------------------------|------------------------------------------------------------------------------|------------------------------|----------------------|-----------------------------|---------------------------------------------------------------------------------------------------------------------------------------------------------------|--------------------------------------------------------------------------------------------------------------------------------------------------------------------------------------------------------------------------------------------------------------------------------------------------------|
| Patient Population      | Diagnostic Test                                                              | Outcome (Criterion Standard) | Consecutive Patients | Independent Test Assessment | Comments                                                                                                                                                      | Source                                                                                                                                                                                                                                                                                                 |
| Suspected recurrent DVT | CUS with measurement of residual venous diameter in abnormal venous segments | Venography                   | Yes                  | Yes                         | N = 29 patients with suspected recurrent DVT; 12 with confirmed recurrence (1 with isolated distal DVT)                                                       | Prandoni P, Cogo A, Bernardi E, et al. A simple ultrasound approach for detection of recurrent proximal-vein thrombosis. <i>Circulation</i> . 1993;88:1730-1735                                                                                                                                        |
|                         |                                                                              | Venography                   | Yes                  | Not stated                  | N = 86 patients with suspected recurrent DVT; 16 patients with confirmed recurrence                                                                           | Villalta S, Rossi L, Bernardi E, Bagatella P, Marchioni A, Scudellar A. Serial compression ultrasonography in the diagnostic approach of patients with clinically suspected recurrent deep vein thrombosis. Interim report of an ongoing study [abstract]. <i>Thromb Haemost</i> . 1997;78(Suppl):588. |
|                         |                                                                              | Venography                   | Not stated           | Not stated                  | N = 16 patients with suspected recurrent DVT; 7 with confirmed recurrence                                                                                     | Koopman MM, Jongbloets L, Lensing AW, Buller H, ten Cate JW. Clinical utility of a quantitative B-mode ultrasonography method in patients with suspected recurrent deep vein thrombosis (DVT) [abstract]. <i>Thromb Haemost</i> . 1993;69:623.                                                         |
|                         |                                                                              | Venography                   | Yes                  | Yes                         | N = 205 patients with suspected recurrent DVT; 10 of 52 patients with initially abnormal CUS either could not undergo venography or had inadequate venography | Prandoni P, Lensing AWA, Bernardi E, Villalta S, Bagatella P, Girolami A for the DERECUS Investigators Group. The diagnostic value of compression ultrasonography in patients with suspected recurrent deep vein thrombosis. <i>Thromb Haemost</i> . 2002;88:402-406.                                  |

All studies are cross-sectional unless otherwise indicated under Comments. See Table S7 legend for expansion of abbreviation.



**Table S39—[Sections 4.1-4.3] Methodology of Diagnostic Studies in Patients With Suspected Recurrent Lower Extremity DVT: Individual Management Studies with Cohorts**

| Study Details           |                                                                                                                                                 | Methods (Single-Arm Cohort vs Cohort From RCT) |                      | Received Alternative Tests |                                                                                 | Source                                                                                                                                                                                                                                                                                                |        |
|-------------------------|-------------------------------------------------------------------------------------------------------------------------------------------------|------------------------------------------------|----------------------|----------------------------|---------------------------------------------------------------------------------|-------------------------------------------------------------------------------------------------------------------------------------------------------------------------------------------------------------------------------------------------------------------------------------------------------|--------|
| Patient Population      | Diagnostic Test                                                                                                                                 | Outcome                                        | Consecutive Patients | Follow-up                  | Comments                                                                        | Source                                                                                                                                                                                                                                                                                                | Source |
| Suspected recurrent DVT | Normal serial CUS (day of presentation, day 2 [ $\pm 1$ ], and day 7 [ $\pm 1$ ])                                                               | Probability of VTE during follow-up            | Yes                  | 6 mo                       | N = 150 patients with normal serial CUS; recurrence confirmed by venography     | Prandoni P, Lensing AWA, Bernardi E, Villalta S, Bagatella P, Girolami A for the DERECUS Investigators Group. The diagnostic value of compression ultrasonography in patients with suspected recurrent deep vein thrombosis. <i>Thromb Haemost.</i> 2002;88:402-406.                                  |        |
|                         | Normal serial CUS (day of presentation, day 1-3, and day 6-10)                                                                                  | Probability of VTE during follow-up            | Yes                  | 3 mo                       | N = 488 patients with suspected recurrence; 129 patients with normal serial CUS | Bates SM, Kearon C, Kahn SR, et al. A negative DD excludes recurrent deep vein thrombosis: results of a multicentre management trial. <i>Blood.</i> 2007;110:214a (abstract # 698).                                                                                                                   |        |
|                         | Negative (normal or unchanged/decreased residual venous diameter) on serial CUS (day of presentation, day 2 [ $\pm 1$ ], and day 7 [ $\pm 1$ ]) | Probability of VTE during follow-up            | Yes                  | 6 mo                       | N = 65 patients with negative serial CUS; recurrence confirmed by venography    | Villalta S, Rossi L, Bernardi E, Bagatella P, Marchioni A, Scudellar A. Serial compression ultrasonography in the diagnostic approach of patients with clinically suspected recurrent deep vein thrombosis. Interim report of an ongoing study [abstract]. <i>Thromb Haemost.</i> 1997;78(suppl):588. |        |
|                         | Unchanged residual venous diameter (< 4-mm increase in residual venous diameter) on serial CUS (day of presentation and day 7)                  | Probability of VTE during follow-up            | Yes                  | 3 mo                       | N = 42 patients with unchanged residual venous diameter on serial CUS           | Le Gal G, Kovacs MJ, Carrier M, et al. Validation of a diagnostic approach to exclude recurrent venous thromboembolism. <i>J Thromb Haemost.</i> 2009;7:752-759.                                                                                                                                      |        |

(Continued)

**Table S39—Continued**

| Study Details                                                                                                                                     |                                     | Received Alternative Tests | Follow-up                                      | Consecutive Patients | Comments | Source                                                                                                                                                                                                                                                                                                                                                                                                                                                                                                                                                                                                                                       |
|---------------------------------------------------------------------------------------------------------------------------------------------------|-------------------------------------|----------------------------|------------------------------------------------|----------------------|----------|----------------------------------------------------------------------------------------------------------------------------------------------------------------------------------------------------------------------------------------------------------------------------------------------------------------------------------------------------------------------------------------------------------------------------------------------------------------------------------------------------------------------------------------------------------------------------------------------------------------------------------------------|
| Patient Population                                                                                                                                | Diagnostic Test                     | Outcome                    | Methods (Single-Arm Cohort vs Cohort From RCT) | Yes                  | No       |                                                                                                                                                                                                                                                                                                                                                                                                                                                                                                                                                                                                                                              |
| Unchanged residual venous diameter (< 4-mm increase) at presentation and negative sensitive DD (Biopool Autodimer; threshold level not specified) | Probability of VTE during follow-up | Single-arm cohort          | Yes                                            | 3 mo                 | No       | Prandoni P, Tormene D, Dalla Valle F, Concolator A, Pesavento R. D-Dimer as an adjunct to compression ultrasonography in patients with suspected recurrent deep vein thrombosis. <i>J Thromb Haemost</i> . 2007;5:1076-1077.                                                                                                                                                                                                                                                                                                                                                                                                                 |
| Unlikely PTP according to Wells model and negative sensitive (STA Liatest, < 0.4 µg/mL) DD                                                        | Probability of VTE during follow-up | Single-arm cohort          | Yes                                            | 3 mo                 | No       | N = 146 patients with suspected recurrence, all of whom underwent CUS; 38 patients diagnosed at presentation with recurrence (new noncompressible segment or increased residual venous diameter of > 4 mm); 75 of 108 remaining patients had a negative DD and were followed for recurrence<br><br>N = 105 patients with suspected recurrent DVT; 61 had an “unlikely” PTP for DVT using the Wells model; 16 had a negative DD and were followed for recurrence<br><br>Aguilar C, del Villar V. Combined D-dimer and clinical probability are useful for exclusion of recurrent deep venous thrombosis. <i>Am J Hematol</i> . 2007;82:41-44. |
| Negative sensitive (STA Liatest, 0.4 µg/mL) DD                                                                                                    | Probability of VTE during follow-up | Single-arm cohort          | Yes                                            | 3 mo                 | No       | Rathbun SW, Whitsett TL, Raskob GE. Negative d-dimer result to exclude recurrent deep vein thrombosis: a management trial. <i>Ann Intern Med</i> . 2004;141:839-845.                                                                                                                                                                                                                                                                                                                                                                                                                                                                         |
| Negative sensitive (MDA, < 0.5 µg/mL) DD                                                                                                          | Probability of VTE during follow-up | Single-arm cohort          | Yes                                            | 3 mo                 | No       | Bates SM, Kearon C, Kahn SR, et al. A negative D-dimer excludes recurrent deep vein thrombosis: results of a multicentre management trial. <i>Blood</i> . 2007;110:214a (abstract # 698).                                                                                                                                                                                                                                                                                                                                                                                                                                                    |

Cohorts from single-arm studies or cohorts representing one of the arms of an RCT. See Table S1, S2, and S7 legends for expansion of abbreviations.

**Table S40—[Sections 4.1-4.3] Description and Results for Diagnostic Studies in Patients With Suspected Recurrent Lower Extremity DVT**

| Question From Structured Clinical Question Table      | Clinical Situation/ Question                                                                                                                                     | Meta-analysis vs Primary Study | Reference Standard | Patient Population                    | Outcome Measure <sup>a</sup>                                                                                          | Result, % (95% CI) | Comments                                                                                                | Reference                                                                                                                                                                                                                                                                                              |
|-------------------------------------------------------|------------------------------------------------------------------------------------------------------------------------------------------------------------------|--------------------------------|--------------------|---------------------------------------|-----------------------------------------------------------------------------------------------------------------------|--------------------|---------------------------------------------------------------------------------------------------------|--------------------------------------------------------------------------------------------------------------------------------------------------------------------------------------------------------------------------------------------------------------------------------------------------------|
| Suspected recurrent lower extremity DVT (Section 4.0) | What are the consequences of using venography to diagnose recurrent lower extremity DVT?                                                                         | N/A                            | N/A                | Patients with suspected recurrent DVT | N/A                                                                                                                   | N/A                | Implied reference standard                                                                              | N/A                                                                                                                                                                                                                                                                                                    |
|                                                       | What are the consequences of using venography to rule out recurrent lower extremity DVT?                                                                         | N/A                            | N/A                | Patients with suspected recurrent DVT | N/A                                                                                                                   | N/A                | Implied reference standard                                                                              | N/A                                                                                                                                                                                                                                                                                                    |
|                                                       | What are the consequences of using CUS (new noncompressible segment or increased residual venous diameter compared with previous CUS) to diagnose recurrent DVT? | Primary study                  | Venography         | Patients with suspected recurrent DVT | Specificity: new noncompressible segment or increased residual venous diameter $\geq 2$ mm compared with previous CUS | 100 (81-100)       | N = 29 patients with suspected recurrent DVT; 12 with confirmed recurrence (1 with isolated distal DVT) | Prandoni P, Cogo A, Bernardi E, et al. A simple ultrasound approach for detection of recurrent proximal-vein thrombosis. <i>Circulation</i> . 1993;88:1730-1735.                                                                                                                                       |
|                                                       |                                                                                                                                                                  | Primary study                  | Venography         | Patients with suspected recurrent DVT | Specificity: new noncompressible segment or increased residual venous diameter $\geq 2$ mm compared with previous CUS | 97 (90-99)         | N = 86 patients with suspected recurrence; 16 patients with confirmed recurrence                        | Villalta S, Rossi L, Bernardi E, Bagatella P, Marchioni A, Scudellar A. Serial compression ultrasonography in the diagnostic approach of patients with clinically suspected recurrent deep vein thrombosis. Interim report of an ongoing study [abstract]. <i>Thromb Haemost</i> . 1997;78(Suppl):588. |

(Continued)

**Table S40—Continued**

| Question From Structured Clinical Question Table | Clinical Situation/Question | Meta-analysis vs Primary Study | Reference Standard | Patient Population                    | Outcome Measure <sup>a</sup>                                                                                                                            | Result, % (95% CI) | Comments                                                                                                                                                                                                                          | Reference                                                                                                                                                                                                                                                            |
|--------------------------------------------------|-----------------------------|--------------------------------|--------------------|---------------------------------------|---------------------------------------------------------------------------------------------------------------------------------------------------------|--------------------|-----------------------------------------------------------------------------------------------------------------------------------------------------------------------------------------------------------------------------------|----------------------------------------------------------------------------------------------------------------------------------------------------------------------------------------------------------------------------------------------------------------------|
|                                                  |                             | Primary study                  | Venography         | Patients with suspected recurrent DVT | Specificity (a) New noncompressible segment or increased residual venous diameter 1-2 mm compared with previous CUS                                     | (a) 78 (45-94)     | N = 16 patients with suspected recurrence; 7 with confirmed recurrence                                                                                                                                                            | Koopman MM, Jongbloets L, Lensing AW, Buller H, ten Cate JW. Clinical utility of a quantitative B-mode ultrasonography method in patients with suspected recurrent deep vein thrombosis (DVT) [abstract]. <i>Thromb Haemost.</i> 1993;69:623.                        |
|                                                  |                             |                                |                    |                                       | Specificity (b) New noncompressible segment or increased residual venous diameter $\geq$ 4 mm compared with previous CUS                                | (b) 100 (70-100)   |                                                                                                                                                                                                                                   |                                                                                                                                                                                                                                                                      |
|                                                  |                             | Primary study                  | Venography         | Patients with suspected recurrent DVT | Positive predictive value (a) New noncompressible segment                                                                                               | (a) 100 (72-100)   | N = 205 patients with suspected recurrent DVT; 10 of 52 patients with initially abnormal CUS either could not undergo venography or had inadequate venography; results of 42 patients used to calculate positive predictive value | Prandoni P, Lensing AWA, Bernardi E, Villalta S, Bagatella P, Girolami A for the DERECUS Investigators Group. The diagnostic value of compression ultrasonography in patients with suspected recurrent deep vein thrombosis. <i>Thromb Haemost.</i> 2002;88:402-406. |
|                                                  |                             |                                |                    |                                       | Positive predictive value (b) New noncompressible segment and/or increased residual venous diameter $\geq$ 2 mm compared with previous compression US   | (b) 86 (69-94)     |                                                                                                                                                                                                                                   |                                                                                                                                                                                                                                                                      |
|                                                  |                             |                                |                    |                                       | Positive predictive value (c) New noncompressible segment and/or increased residual venous diameter $\geq$ 2 mm but $<$ 4 mm compared with previous CUS | (c) 50 (22-79)     |                                                                                                                                                                                                                                   |                                                                                                                                                                                                                                                                      |
|                                                  |                             |                                |                    |                                       | Positive predictive value (d) Increased residual venous diameter $>$ 4 mm compared with previous CUS                                                    | (d) 100 (84-100)   |                                                                                                                                                                                                                                   |                                                                                                                                                                                                                                                                      |

(Continued)

**Table S40—Continued**

| Question From Structured Clinical Question Table | Clinical Situation/ Question                                                                                                                     | Meta-analysis vs Primary Study | Reference Standard | Patient Population                    | Outcome Measure <sup>a</sup>                                                                                                                                                                                                               | Result, % (95% CI)                                  | Comments                                                                                                | Reference                                                                                                                                                                                                                                                                                              |
|--------------------------------------------------|--------------------------------------------------------------------------------------------------------------------------------------------------|--------------------------------|--------------------|---------------------------------------|--------------------------------------------------------------------------------------------------------------------------------------------------------------------------------------------------------------------------------------------|-----------------------------------------------------|---------------------------------------------------------------------------------------------------------|--------------------------------------------------------------------------------------------------------------------------------------------------------------------------------------------------------------------------------------------------------------------------------------------------------|
|                                                  | What are the consequences of using a single CUS (full compressibility, unchanged or improved residual venous diameter) to exclude recurrent DVT? | Primary study                  | Venography         | Patients with suspected recurrent DVT | Sensitivity: Full compressibility, unchanged (< 2 mm) or improved residual venous diameter compared with previous CUS                                                                                                                      | Overall: 91 (59-100)<br>Proximal only: 100 (69-100) | N = 29 patients with suspected recurrent DVT; 12 with confirmed recurrence (1 with isolated distal DVT) | Prandoni P, Cogo A, Bernardi E, et al. A simple ultrasound approach for detection of recurrent proximal-vein thrombosis. <i>Circulation</i> . 1993;88:1730-1735.                                                                                                                                       |
|                                                  |                                                                                                                                                  | Primary study                  | Venography         | Patients with suspected recurrent DVT | Sensitivity: Full compressibility, unchanged (< 2 mm) or improved residual venous diameter compared with previous CUS                                                                                                                      | 100 (81-100)                                        | N = 86 patients with suspected recurrence; 16 patients with confirmed recurrence                        | Villalta S, Rossi L, Bernardi E, Bagatella P, Marchiori A, Scudellar A. Serial compression ultrasonography in the diagnostic approach of patients with clinically suspected recurrent deep vein thrombosis. Interim report of an ongoing study [abstract]. <i>Thromb Haemost</i> . 1997;78(suppl):588. |
|                                                  |                                                                                                                                                  | Primary study                  | Venography         | Patients with suspected recurrent DVT | Sensitivity (a) New noncompressible segment or increased residual venous diameter 1-2 mm compared with previous CUS<br>Sensitivity (b) New noncompressible segment or increased residual venous diameter ≥ 4 mm compared with previous CUS | (a) 29 (8-64)<br>(b) 71 (36-92)                     | N = 16 patients with suspected recurrence; 7 with confirmed recurrence                                  | Koopman MM, Jongbloets L, Lensing AW, Buller H, ten Cate JW. Clinical utility of a quantitative B-mode ultrasonography method in patients with suspected recurrent deep vein thrombosis (DVT) [abstract]. <i>Thromb Haemost</i> . 1993;69:623.                                                         |

(Continued)

**Table S40—Continued**

| Question From Structured Clinical Question Table | Clinical Situation/ Question                                            | Meta-analysis vs Primary Study | Reference Standard                                 | Patient Population                                                                                                                                                                   | Outcome Measure <sup>a</sup> | Result, % (95% CI) | Comments                                                                                                                                                                                     | Reference                                                                                                                                                                                                                                                                                             |
|--------------------------------------------------|-------------------------------------------------------------------------|--------------------------------|----------------------------------------------------|--------------------------------------------------------------------------------------------------------------------------------------------------------------------------------------|------------------------------|--------------------|----------------------------------------------------------------------------------------------------------------------------------------------------------------------------------------------|-------------------------------------------------------------------------------------------------------------------------------------------------------------------------------------------------------------------------------------------------------------------------------------------------------|
|                                                  | What are the consequences of using serial CUS to exclude recurrent DVT? | Primary                        | Confirmed VTE during 6 mo of follow-up             | Patients with suspected recurrent DVT and normal serial CUS (day of presentation, day 2 [ $\pm 1$ ] and day 7 [ $\pm 1$ ])                                                           | NPV                          | 99 (95-100)        | N = 150 patients with normal serial CUS; 1 patient died of confirmed myocardial infarction during follow-up and analysis based on 149 remaining patients; recurrence confirmed by venography | Prandoni P, Lensing AWA, Bernardi E, Villalta S, Bagatella P, Girolami A for the DERECUS Investigators Group. The diagnostic value of compression ultrasonography in patients with suspected recurrent deep vein thrombosis. <i>Thromb Haemost.</i> 2002;88:402-406.                                  |
|                                                  |                                                                         | Primary                        | Confirmed VTE during 3 mo of follow-up             | Patients with suspected recurrent DVT and normal serial CUS (day of presentation, day 1-3, and day 6-10)                                                                             | NPV                          | 98 (92-99)         | N = 488 patients with suspected recurrence; 129 with normal serial CUS                                                                                                                       | Bates SM, Kearon C, Kahn SR, et al. A negative DD excludes recurrent deep vein thrombosis: results of a multicentre management trial. <i>Blood.</i> 2007;110:214a (abstract #698).                                                                                                                    |
|                                                  |                                                                         | Primary                        | Confirmed VTE during 6 mo of follow-up             | Patients with suspected recurrent DVT and negative (normal or unchanged/improved residual venous diameter) serial CUS (day of presentation, day 2 [ $\pm 1$ ] and day 7 [ $\pm 1$ ]) | NPV                          | 97 (90-99)         | N = 65 patients with negative serial CUS; recurrence confirmed by venography                                                                                                                 | Villalta S, Rossi L, Bernardi E, Bagatella P, Marchiori A, Scudellar A. Serial compression ultrasonography in the diagnostic approach of patients with clinically suspected recurrent deep vein thrombosis. Interim report of an ongoing study [abstract]. <i>Thromb Haemost.</i> 1997;78(Suppl):588. |
|                                                  |                                                                         | Primary                        | Confirmed thromboembolism during 3 mo of follow-up | Patients with unchanged residual venous diameter (< 4-mm increase in residual venous diameter) on serial CUS (day of presentation and day 7)                                         | NPV                          | 95 (84-99)         | N = 42 patients with unchanged residual venous diameter on serial CUS                                                                                                                        | Le Gal C, Kovacs MJ, Carrier M, et al. Validation of a diagnostic approach to exclude recurrent venous thromboembolism. <i>J Thromb Haemost.</i> 2009;7:752-759.                                                                                                                                      |

(Continued)

**Table S40—Continued**

| Question From Structured Clinical Question Table | Clinical Situation/ Question                                                                                                                  | Meta-analysis vs Primary Study | Reference Standard                                 | Patient Population                                                                                                               | Outcome Measure <sup>a</sup> | Result, % (95% CI) | Comments                                                                                                                                                                                                                                                                                    | Reference                                                                                                                                                                                                                   |
|--------------------------------------------------|-----------------------------------------------------------------------------------------------------------------------------------------------|--------------------------------|----------------------------------------------------|----------------------------------------------------------------------------------------------------------------------------------|------------------------------|--------------------|---------------------------------------------------------------------------------------------------------------------------------------------------------------------------------------------------------------------------------------------------------------------------------------------|-----------------------------------------------------------------------------------------------------------------------------------------------------------------------------------------------------------------------------|
|                                                  | What are the consequences of using an unchanged CUS at presentation and negative sensitive DD to exclude recurrent DVT?                       | Primary                        | Confirmed thromboembolism during 3 mo of follow-up | Patients with unchanged residual venous diameter (< 4-mm increase) at presentation and negative sensitive DD (Biopool Autodimer) | NPV                          | 100 (95-100)       | N = 146 patients with suspected recurrence, all of whom underwent CUS; 38 patients diagnosed at presentation with recurrence (new noncompressible segment or increased residual venous diameter of > 4 mm; 75 of 108 remaining patients had a negative DD and were followed for recurrence) | Prandoni P, Tornene D, Dalla Valle F, Concolator A, Pesavento R. D-Dimer as an adjunct to compression ultrasonography in patients with suspected recurrent deep vein thrombosis. <i>J Thromb Haemost.</i> 2007;5:1076-1077. |
|                                                  | What are the consequences of using an unchanged CUS at presentation and a negative SimpliRED DD to exclude recurrent DVT?                     | N/A                            | N/A                                                | N/A                                                                                                                              | N/A                          | N/A                | There are no accuracy or management studies of the SimpliRED DD in combination with CUS in this patient population                                                                                                                                                                          | N/A                                                                                                                                                                                                                         |
|                                                  | What are the consequences of using an unlikely PTP with the Wells model in combination with a negative sensitive DD to exclude recurrent DVT? | Primary study                  | Confirmed thromboembolism during 3 mo of follow-up | Patients with unlikely PTP and negative sensitive DD (STA Liatest, < 0.4 ug/mL)                                                  | NPV                          | 100 (81-100)       | N = 105 patients with suspected recurrent DVT; 61 had an "unlikely" PTP for DVT using the Wells model; 16 had a negative DD and were followed for recurrence                                                                                                                                | Aguilar C, de Villar V. Combined D-dimer and clinical probability are useful for exclusion of recurrent deep venous thrombosis. <i>Am J Hematol.</i> 2007;82:41-44.                                                         |

(Continued)

**Table S40—Continued**

| Question From Structured Clinical Question Table | Clinical Situation/Question                                                                                                          | Meta-analysis vs Primary Study | Reference Standard                            | Patient Population                    | Outcome Measure <sup>a</sup> | Result, % (95% CI)                                                                    | Comments                                                                                                                                                                       | Reference                                                                                                                                                                               |
|--------------------------------------------------|--------------------------------------------------------------------------------------------------------------------------------------|--------------------------------|-----------------------------------------------|---------------------------------------|------------------------------|---------------------------------------------------------------------------------------|--------------------------------------------------------------------------------------------------------------------------------------------------------------------------------|-----------------------------------------------------------------------------------------------------------------------------------------------------------------------------------------|
|                                                  | What are the consequences of using a low PTP with the Wells model with a negative sensitive DD to exclude recurrent DVT?             | N/A                            | N/A                                           | N/A                                   | N/A                          | N/A                                                                                   | There are no accuracy or management studies of the combination of sensitive DD and PTP in this patient population                                                              | N/A                                                                                                                                                                                     |
|                                                  | What are the consequences of using a low or moderate PTP with the Wells model with a negative sensitive DD to exclude recurrent DVT? | N/A                            | N/A                                           | N/A                                   | N/A                          | N/A                                                                                   | There are no accuracy or management studies of the combination of sensitive DD and PTP in this patient population                                                              | N/A                                                                                                                                                                                     |
|                                                  | What are the consequences of using a sensitive DD as a stand-alone test to exclude recurrent DVT?                                    | Primary                        | Confirmed recurrence during 3 mo of follow-up | Patients with suspected recurrent DVT | NPV of the STA<br>Liatest DD | Confirmed recurrence: 99 (96-100)<br><br>Confirmed or possible recurrence: 95 (90-97) | N = 300 patients with suspected recurrent DVT; 134 had a negative DD, recurrence confirmed in 1 patient; however, recurrence could not be excluded in an additional 6 patients | Rathbum SW, Whitsett TL, Raskob GE. Negative D-dimer result to exclude recurrent deep vein thrombosis: a management trial. <i>Ann Intern Med.</i> 2004;141:839-845.                     |
|                                                  |                                                                                                                                      | Primary                        | Confirmed recurrence during 3 mo of follow-up | Patients with suspected recurrent DVT | NPV of the MDA DD            | 98 (96-100)                                                                           | N = 488 patients with suspected recurrent DVT; 229 had a negative DD, recurrence confirmed in 4 patients                                                                       | Bates SM, Kearon C, Kahn SR, et al. A negative D-dimer excludes recurrent deep vein thrombosis: results of a multicentre management trial. <i>Blood.</i> 2007;110:214a (abstract #698). |

(Continued)



**Table S40—Continued**

| Question From Structured Clinical Question Table | Clinical Situation/ Question                                                              | Meta-analysis vs Primary Study | Reference Standard | Patient Population                    | Outcome Measure <sup>a</sup> | Result, % (95% CI) | Comments                                                                                             | Reference |
|--------------------------------------------------|-------------------------------------------------------------------------------------------|--------------------------------|--------------------|---------------------------------------|------------------------------|--------------------|------------------------------------------------------------------------------------------------------|-----------|
|                                                  | What are the consequences of using a SimpliRED DD as a stand-alone test to recurrent DVT? | N/A                            | N/A                | N/A                                   | N/A                          | N/A                | There are no accuracy or management studies of the SimpliRED DD alone in this patient population     | N/A       |
|                                                  | What are the consequences of using CT scan venography to diagnose recurrent DVT?          | N/A                            | N/A                | Patients with suspected recurrent DVT | N/A                          | N/A                | There are no accuracy or management studies of CT scan venography in this population                 | N/A       |
|                                                  | What are the consequences of using CT scan venography to exclude recurrent DVT?           | N/A                            | N/A                | Patients with suspected recurrent DVT | N/A                          | N/A                | There are no accuracy or management studies of CT scan venography in this population                 | N/A       |
|                                                  | What are the consequences of using MRI to diagnose recurrent DVT?                         | N/A                            | N/A                | Patients with suspected recurrent DVT | N/A                          | N/A                | There are no accuracy or management studies of MR venography or direct MR imaging in this population | N/A       |
|                                                  | What are the consequences of using MRI to exclude recurrent DVT?                          | N/A                            | N/A                | Patients with suspected recurrent DVT | N/A                          | N/A                | There are no accuracy or management studies of MR venography or direct MR imaging in this population | N/A       |

<sup>a</sup>eg, Post-TP during 3 month follow-up; sensitivity or specificity, and so forth. See Table S1, S3, and S7 legends for expansion of abbreviations.

**Table S41—[Sections 4.1-4.3] Evidence Profile: Should Serial Normal Proximal CUS Be Used to Rule Out Recurrent DVT?**

| No. of Studies (Patients)  | Design                                           | Limitations                                                                                                                                      | Inconsistency | Indirectness | Imprecision               | Other Considerations                                                                                                | Quality Assessment  |                            |
|----------------------------|--------------------------------------------------|--------------------------------------------------------------------------------------------------------------------------------------------------|---------------|--------------|---------------------------|---------------------------------------------------------------------------------------------------------------------|---------------------|----------------------------|
|                            |                                                  |                                                                                                                                                  |               |              |                           |                                                                                                                     | Accuracy Indices, % | Summary of Findings        |
|                            |                                                  | Negative predictive value of serial normal CUS (day of presentation, day 2 [ $\pm$ 1], day 7 [ $\pm$ 1]) for recurrent DVT during 6-mo follow-up |               |              |                           |                                                                                                                     |                     |                            |
| 2 Studies<br>Study 1 = 150 | Single-arm prospective management cohort studies | Moderate <sup>a</sup>                                                                                                                            | None          | N/A          | Study 1: 95% CI, 95%-100% | 3- (Study 2) or 6- (Study 1) mo follow-up as reference standard. Confined to patients with a positive DD in Study 2 |                     | Moderate                   |
| Study 2 = 129              |                                                  |                                                                                                                                                  |               |              | Study 2: 95% CI, 92%-99%  |                                                                                                                     |                     | Study 1: 99<br>Study 2: 98 |

Bibliography: Prandoni P, Lensing AWA, Bernardi E, Villalta S, Bagatella P, Girolami A for the DEFRECUS Investigators Group. The diagnostic value of compression ultrasonography in patients with suspected deep vein thrombosis. *Thromb Haemost*. 2002;88(3):402-406. Bates SM, Kearon C, Kahn SR, et al. A negative DD excludes recurrent deep vein thrombosis: results of a multicentre management trial. *Blood*. 2007;110:214a (abstract #698). Settings: predominantly outpatients. See Table S7 legend for expansion of abbreviation.

<sup>a</sup>Study by Bates et al only in abstract form.

**Table S42—[Sections 4.1-4.3] Evidence Profile: Should the Criterion of New Noncompressible Segment or Increased Residual Venous Diameter of 1-2 mm on CUS Be Used to Rule Out or Diagnose Recurrent DVT?**

| Outcome                                                       | No. of Studies      | Study Design    | Limitations <sup>a</sup> | Inconsistency <sup>b</sup> | Indirectness <sup>c</sup> | Imprecision <sup>d</sup> | Final Quality | Effect/1,000 <sup>e</sup>                      |
|---------------------------------------------------------------|---------------------|-----------------|--------------------------|----------------------------|---------------------------|--------------------------|---------------|------------------------------------------------|
| True positive (patients with DVT)                             | 1 (16 participants) | Accuracy cohort | Serious                  | N/A                        | Serious                   | Very serious             | Low           | Prev 53%: 154<br>Prev 17%: 49<br>Prev 5%: 14   |
| True negative (patients without DVT)                          |                     |                 |                          |                            |                           |                          |               | Prev 53%: 367<br>Prev 17%: 647<br>Prev 5%: 741 |
| False negative (patients incorrectly classified DVT negative) |                     |                 |                          |                            |                           |                          |               | Prev 53%: 376<br>Prev 17%: 121<br>Prev 5%: 36  |
| False positive (patients incorrectly classified DVT positive) |                     |                 |                          |                            |                           |                          |               | Prev 53%: 103<br>Prev 17%: 183<br>Prev 5%: 209 |

Bibliography: Koopman MM, Jongbloets L, Lensing AWA, Buller H, ten Cate JW. Clinical utility of a quantitative B-mode ultrasonography method in patients with suspected recurrent deep vein thrombosis (DVT) [abstract]. *Thromb Haemost*. 1993;69:623. Settings: not stated. Reference standard: venography. See Table S7 legend for expansion of abbreviation.

<sup>a</sup>Setting not stated, published only in abstract form, unclear if consecutive or selected patients used; technique requires local expertise and previous CUS for comparison.

<sup>b</sup>Single study.

<sup>c</sup>Accuracy study.

<sup>d</sup>Wide 95% CIs.

<sup>e</sup>Based on a specificity of 78% (95% CI, 45%-94%) and sensitivity of 29% (95% CI, 8%-64%). Prevalences taken from Wells et al.<sup>30</sup>

**Table S43—[Sections 4.1-4.3] Evidence Profile: Should the Criterion of New Noncompressible Segment or Increased Residual Venous Diameter of  $\geq 2$  mm on Proximal CUS Be Used to Rule Out or Diagnose Recurrent DVT?**

| Outcome                                                       | No. of Studies       | Study Design     | Limitations <sup>a</sup> | Inconsistency <sup>b</sup> | Indirectness <sup>c</sup> | Imprecision <sup>d</sup> | Final Quality | Effect/1,000 <sup>e</sup>                      |
|---------------------------------------------------------------|----------------------|------------------|--------------------------|----------------------------|---------------------------|--------------------------|---------------|------------------------------------------------|
| True positive (patients with DVT)                             | 2 (115 Participants) | Accuracy cohorts | Serious                  | No                         | Serious                   | Serious                  | Low           | Prev 53%: 482<br>Prev 17%: 456<br>Prev 5%: 49  |
| True negative (patients without DVT)                          |                      |                  |                          |                            |                           |                          |               | Prev 53%: 155<br>Prev 17%: 805<br>Prev 5%: 921 |
| False negative (patients incorrectly classified DVT negative) |                      |                  |                          |                            |                           |                          |               | Prev 53%: 49<br>Prev 17%: 15<br>Prev 5%: 5     |
| False positive (patients incorrectly classified DVT positive) |                      |                  |                          |                            |                           |                          |               | Prev 53%: 14<br>Prev 17%: 25<br>Prev 5%: 29    |

Bibliography: Prandoni P, Cogo A, Bernardi E, et al. A simple ultrasound approach for detection of recurrent proximal-vein thrombosis. *Circulation*. 1993;88:1730-1735. Villalta S, Rossi L, Bernardi E, Bagatella P, Marchiori A, Scudellar A. Serial compression ultrasonography in the diagnostic approach of patients with clinically suspected recurrent deep vein thrombosis. Interim report of an ongoing study [abstract]. *Thromb Haemost*. 1997;78 (suppl):588. Setting: suspected recurrent DVT. Reference test: venography. See Table S7 legend for expansion of abbreviation.

<sup>a</sup>Villalta et al published only in abstract form, unclear if consecutive or selected patients used; technique requires local expertise and previous CUS for comparison.

<sup>b</sup>Two studies only.

<sup>c</sup>Accuracy study.

<sup>d</sup>Wide 95% CIs.

<sup>e</sup>Based on a specificity of 97% and sensitivity of 91%. Prevalences taken from Wells et al.<sup>30</sup>

**Table S44—[Sections 4.1-4.3] Evidence Profile: Should the Criterion of New Noncompressible Segment or Increased Residual Venous Diameter of > 4 mm on Proximal CUS Be Used to Rule Out or Diagnose Recurrent DVT?**

| Outcome                                                       | No. of Studies                                                                                  | Study Design    | Limitations <sup>a</sup> | Inconsistency <sup>b</sup> | Indirectness <sup>c</sup> | Imprecision <sup>d</sup> | Final Quality | Effect/1,000 <sup>e</sup>                      |
|---------------------------------------------------------------|-------------------------------------------------------------------------------------------------|-----------------|--------------------------|----------------------------|---------------------------|--------------------------|---------------|------------------------------------------------|
| True positive (patients with DVT)                             | 2, but estimates of both sensitivity and specificity only in 1 (16 participants; Koopman et al) | Accuracy cohort | Serious                  | N/A                        | Serious                   | Very serious             | Moderate      | Prev 53%: 376<br>Prev 17%: 121<br>Prev 5%: 36  |
| True negative (patients without DVT)                          |                                                                                                 |                 |                          |                            |                           |                          |               | Prev 53%: 470<br>Prev 17%: 830<br>Prev 5%: 950 |
| False negative (patients incorrectly classified DVT negative) |                                                                                                 |                 |                          |                            |                           |                          |               | Prev 53%: 154<br>Prev 17%: 50<br>Prev 5%: 14   |
| False positive (patients incorrectly classified DVT positive) |                                                                                                 |                 |                          |                            |                           |                          |               | Prev 53%: 0<br>Prev 17%: 0<br>Prev 5%: 0       |

Bibliography: Koopman MM, Jongbloets L, Lensing AWA, Buller H, ten Cate JW. Clinical utility of a quantitative B-mode ultrasonography method in patients with suspected recurrent deep vein thrombosis (DVT) [abstract]. *Thromb Haemost.* 1993;69:623. Prandoni P, Lensing AWA, Bernardi E, Villalta S, Bagatella P, Girolami A for the DERECUS Investigators Group. The diagnostic value of compression ultrasonography in patients with suspected deep vein thrombosis. *Thromb Haemost.* 2002;88:402-406. Setting: suspected recurrent DVT. Reference test: venography. See Table S3 and S7 legends for expansion of abbreviations.

<sup>a</sup>Setting not stated, published only in abstract form, unclear if consecutive or selected patients used; technique requires local expertise and previous CUS for comparison (Koopman et al); positive predictive value only of 100% (95% CI, 84%-100%) (Prandoni et al).

<sup>b</sup>Single study only for sensitivity and specificity.

<sup>c</sup>Accuracy studies.

<sup>d</sup>Wide 95% CIs.

<sup>e</sup>Based on a specificity of 100% (95% CI, 70%-100%) and sensitivity of 71% (95% CI, 36%-92%) (Koopman et al); positive predictive value of 100% (95% CI, 84%-100%); sensitivity and specificity not provided (Prandoni et al). Prevalences taken from Wells et al.<sup>30</sup>

**Table S45—[Sections 4.1-4.3] Evidence Profile: Should the Combination of an Unchanged CUS (Change in Residual Venous Diameter of <4 mm) and a Negative Highly Sensitive DD (Biopool Autodimer) Be Used to Exclude Recurrent DVT?**

| No. of Studies (Patients)                                                | Quality Assessment                  |                      |               |              |                  |                      | Summary of Findings |          |
|--------------------------------------------------------------------------|-------------------------------------|----------------------|---------------|--------------|------------------|----------------------|---------------------|----------|
|                                                                          | Design                              | Limitations          | Inconsistency | Indirectness | Imprecision      | Other Considerations | NPV                 | Quality  |
| 1 (145; 75 patients had an unchanged CUS and negative Biopool Autodimer) | Prospective single-arm cohort study | Serious <sup>a</sup> | Single study  | N/A          | 95% CI, 95%-100% | ...                  | 100%                | Moderate |

NPV of an unchanged proximal CUS (change in residual venous diameter of <4 mm) and a sensitive DD during 3-mo follow-up

Bibliography: Prandoni P, Tormeni D, Dalla Valle, A Concolato, Pesavento R. DD as an adjunct to compression ultrasonography in patients with suspected recurrent deep vein thrombosis. *J Thromb Haemost.* 2007;5:1076-1077. Settings: not stated. See Table S1, S3, and S7 legends for expansion of abbreviations.

<sup>a</sup>Single-center study; setting not specified; unclear if patients receiving long-term warfarin included; technique requires local expertise and previous CUS for comparison

**Table S46—[Sections 4.1-4.3] Evidence Profile: Should the Combination of an Unlikely PTP and Negative Highly Sensitive DD (STA Liatest) Be Used to Exclude Recurrent DVT?**

| No. of Studies (Patients)                                              | Quality Assessment                  |                                                                                              |               |              |                                   |                                                              | Summary of Findings           |         |
|------------------------------------------------------------------------|-------------------------------------|----------------------------------------------------------------------------------------------|---------------|--------------|-----------------------------------|--------------------------------------------------------------|-------------------------------|---------|
|                                                                        | Design                              | Limitations                                                                                  | Inconsistency | Indirectness | Imprecision                       | Other Considerations                                         | Sensitive DD and Unlikely PTP | Quality |
| 1 (105; 16 with unlikely PTP and negative STA Liatest DD (<0.4 µg/mL)) | Prospective single-arm cohort study | NPV compared with confirmed recurrent VTE during 3-mo follow-up<br>Very serious <sup>a</sup> | Single study  | N/A          | Very serious;<br>95% CI, 81%-100% | Study excluded patients receiving long-term warfarin therapy | 100%                          | Low     |

Bibliography: Aguilar C, del Villar V. Combined D-dimer and clinical probability are useful for exclusion of recurrent deep venous thrombosis. *Am J Hematol.* 2007;82:41-44. Settings: ED. See Table S1, S3, and S7 legends for expansion of abbreviations.

<sup>a</sup>Only outpatients presenting to the ED were enrolled; patients receiving long-term warfarin were excluded; only 15% of patients could be managed with this approach.

**Table S47—[Sections 4.1-4.3] Evidence Profile: Should a Highly Sensitive DD Be Used to Exclude Recurrent DVT?**

| No. of Studies (Patients)                                  | Design                                | Limitations          | Quality Assessment |              |                                           |                                                               | Other considerations               | Summary of Findings |              |
|------------------------------------------------------------|---------------------------------------|----------------------|--------------------|--------------|-------------------------------------------|---------------------------------------------------------------|------------------------------------|---------------------|--------------|
|                                                            |                                       |                      | Inconsistency      | Indirectness | Imprecision                               | NPV of a sensitive DD for recurrent VTE during 3-mo follow-up |                                    | NPV, % (95% CI)     | Sensitive DD |
| 2 Studies                                                  | Prospective single-arm cohort studies | Serious <sup>a</sup> | None               | N/A          | Serious; in both studies 95% CI, 96%-100% | Both studies included patients receiving long-term warfarin   |                                    |                     | Moderate     |
| Study 1 (300; 134 with negative DD)                        |                                       |                      |                    |              |                                           |                                                               | Study 1: STA Latest DD: 99, 96-100 |                     |              |
| Study 2 (488; 229 with negative DD, 82 with confirmed VTE) |                                       |                      |                    |              |                                           |                                                               | Study 2: MDA DD: 98 (96-100)       |                     |              |

**Bibliography:** Rathbun SW, Whitsett TL, Raskob GE. Negative D-dimer result to exclude recurrent deep vein thrombosis: a management trial. *Ann Intern Med.* 2004;141:839-845. Bates SM, Kearon C, Kahn SR, et al. A negative D-dimer excludes recurrent deep vein thrombosis: results of a multicentre management trial. *Blood.* 2007;110:214a (abstract 698). Settings: Predominantly outpatient; includes patients receiving long-term warfarin. See Table S1 and S3 legends for expansion of abbreviation.

<sup>a</sup>Study by Bates et al only in abstract form; Rathbun et al enrolled only outpatients and 97% of patients in study by Bates et al were outpatients; studies used different sensitive DD assays; in Rathbun et al, NPV could have been as low as 95% (95% CI, 90%-97%) if possible recurrences included; no data provided on proportion of patients with various PTPs; unable to determine exact overall prevalence of recurrent DVT in Rathbun et al study.



**Table S48—[Sections 5.1-5.3] Methodology of Diagnostic Studies in Patients with Suspected Pregnancy-Related DVT: Individual Accuracy Studies**

| Study Details                                    |                                                                                                                                                 |                                                                                                                                                                                                                             |                                   |                                                                                                                                                                                                                                                                                                                                                                                                                                                                                                                                       |                                                                                                                                                                                                                                                                                            |
|--------------------------------------------------|-------------------------------------------------------------------------------------------------------------------------------------------------|-----------------------------------------------------------------------------------------------------------------------------------------------------------------------------------------------------------------------------|-----------------------------------|---------------------------------------------------------------------------------------------------------------------------------------------------------------------------------------------------------------------------------------------------------------------------------------------------------------------------------------------------------------------------------------------------------------------------------------------------------------------------------------------------------------------------------------|--------------------------------------------------------------------------------------------------------------------------------------------------------------------------------------------------------------------------------------------------------------------------------------------|
| Patient Population                               | Diagnostic Test                                                                                                                                 | Outcome (Criterion Standard)                                                                                                                                                                                                | Consecutive Patients              | Independent Test Assessment                                                                                                                                                                                                                                                                                                                                                                                                                                                                                                           | Source                                                                                                                                                                                                                                                                                     |
| Pregnant and postpartum women with suspected DVT | Single complete US extending from the inferior vena cava to the soleal veins                                                                    | VTE during 3 mo of follow-up                                                                                                                                                                                                | No                                | No                                                                                                                                                                                                                                                                                                                                                                                                                                                                                                                                    | Le Gal, Fris A-M, Righini M, et al. Diagnostic value of a negative single complete compression ultrasound of the lower limbs to exclude the diagnosis of deep venous thrombosis in pregnant or postpartum women: a retrospective hospital based study. <i>Thromb Res.</i> 2006;118:691-697 |
| Suspected pregnancy-related DVT                  | Clinical model                                                                                                                                  | CUS at presentation; some patients had follow-up testing on day 3 and 7; all patients were followed for 3 mo                                                                                                                | Not stated; "unselected patients" | Clinical assessment performed prior to performance of diagnostic testing; however, diagnostic test results not blinded                                                                                                                                                                                                                                                                                                                                                                                                                | Chau WS, Lee A, Spencer FA, et al. Predicting deep venous thrombosis in pregnancy: out in "LEFT" field? <i>Ann Intern Med.</i> 2009;151:85-92                                                                                                                                              |
|                                                  | VIDAS DD (bioMerieux)<br>Asserachrome DD (Stago)<br>IL Test DD (Instrumentation Laboratories)<br>Sta-Lia Test (Stago)<br>Innovance DD (Siemens) | CUS at presentation (including examination of the iliac vein in patients with suspicious symptoms), an unspecified proportion underwent serial US on day 3 and 7; all patients with negative testing were followed for 3 mo | Not stated; "unselected patients" | Yes                                                                                                                                                                                                                                                                                                                                                                                                                                                                                                                                   | Chau WS, Lee A, Spencer FA, et al. D-Dimer testing in pregnant patients: toward determining the next "level" in the diagnosis of deep vein thrombosis. <i>J Thromb Haemost.</i> 2010;8:1004-1011                                                                                           |
|                                                  |                                                                                                                                                 |                                                                                                                                                                                                                             |                                   | Failure to use accepted reference standard (venography); small number of events (n = 17; prevalence 8.8%); internal validation only                                                                                                                                                                                                                                                                                                                                                                                                   |                                                                                                                                                                                                                                                                                            |
|                                                  |                                                                                                                                                 |                                                                                                                                                                                                                             |                                   | Frozen samples, failure to use accepted reference standard (venography); small number of events (n=15; prevalence 6.6%)                                                                                                                                                                                                                                                                                                                                                                                                               |                                                                                                                                                                                                                                                                                            |
|                                                  |                                                                                                                                                 |                                                                                                                                                                                                                             |                                   | Retrospective cohort study of 162 women; 82 women were postpartum. Twenty-five women were diagnosed with DVT at presentation; the proportion of patients with calf vein thrombosis only not specified. Nineteen women received anticoagulant therapy despite US that demonstrated no DVT (muscular or superficial thrombosis present only); 3 additional women received who extended ( $\geq 6$ wk) postpartum prophylaxis were excluded from analysis; 11 women discharged without anticoagulant therapy (9%) were lost to follow-up |                                                                                                                                                                                                                                                                                            |

(Continued)

Table S48—Continued

| Study Details      |                 | Outcome<br>(Criterion Standard)                                                                                                                                                                                                                     | Consecutive<br>Patients | Independent<br>Test Assessment | Comments                                                                                                                            | Source                                                                                                                                                                                                                |
|--------------------|-----------------|-----------------------------------------------------------------------------------------------------------------------------------------------------------------------------------------------------------------------------------------------------|-------------------------|--------------------------------|-------------------------------------------------------------------------------------------------------------------------------------|-----------------------------------------------------------------------------------------------------------------------------------------------------------------------------------------------------------------------|
| Patient Population | Diagnostic Test | Outcome<br>(Criterion Standard)                                                                                                                                                                                                                     | Yes                     | Yes                            | Frozen samples, failure to use<br>accepted reference standard<br>(venography); small number of<br>events (n = 13; prevalence 8.7%); | Chan WS, Chumilal SD, Lee AYY,<br>Crowther M, Rodger M, Ginsberg JS.<br>A red blood cell agglutination<br>D-dimer test to exclude deep venous<br>thrombosis in pregnancy. <i>Ann Intern<br/>Med.</i> 2007;147:165-170 |
|                    | SimplifRED DD   | CUS at presentation<br>(including examination of<br>the iliac vein in patients<br>with suspicious symptoms),<br>an unspecified proportion<br>underwent serial US on day<br>3 and 7; all patients with<br>negative testing were<br>followed for 3 mo | Yes                     | Yes                            |                                                                                                                                     |                                                                                                                                                                                                                       |

In addition to meta-analysis, all studies are cross-sectional unless otherwise indicated under Comments. See Table S1 and S7 legends for expansion of abbreviations.



**Table S50—[Sections 5.1-5.3] Description and Results of Diagnostic Studies in Patients with Suspected Pregnancy-Related DVT**

| Question from Structured Clinical Question Table | Clinical Situation/ Question                                                     | Meta-analysis vs Primary Study | Reference Standard | Patient Population                   | Outcome Measure <sup>a</sup> | Result                           | Comments                                                                                                                                                                                                                                                                                        | Reference                                                                                                                                                                                             |
|--------------------------------------------------|----------------------------------------------------------------------------------|--------------------------------|--------------------|--------------------------------------|------------------------------|----------------------------------|-------------------------------------------------------------------------------------------------------------------------------------------------------------------------------------------------------------------------------------------------------------------------------------------------|-------------------------------------------------------------------------------------------------------------------------------------------------------------------------------------------------------|
| Suspected Pregnancy-Related DVT (Section 5.0)    | What are the consequences of using venography to diagnose pregnancy-related DVT? | N/A                            | N/A                | Pregnant patients with suspected DVT | N/A                          | N/A                              | Implied reference standard                                                                                                                                                                                                                                                                      | N/A                                                                                                                                                                                                   |
|                                                  | What are the consequences of using venography to rule out pregnancy-related DVT? | N/A                            | N/A                | Pregnant patients with suspected DVT | N/A                          | N/A                              | Implied reference standard                                                                                                                                                                                                                                                                      | N/A                                                                                                                                                                                                   |
|                                                  | What are the consequences of using CUS to diagnose pregnancy-related DVT?        | N/A                            | N/A                | Pregnant patients with suspected DVT | N/A                          | N/A                              | N/A                                                                                                                                                                                                                                                                                             | N/A                                                                                                                                                                                                   |
|                                                  | What are the consequences of using CUS to diagnose pregnancy-related DVT?        | Primary, cohort management     | 3-mo follow-up     | Pregnant patients with suspected DVT | NPV                          | NPV, 99.3% (95% CI, 96.0%-99.9%) | N = 149 (prevalence 8.7%); CUS of the proximal veins and calf trifurcation at presentation (including examination of the iliac vein in patients with suspicious symptoms), an unspecified proportion underwent serial US on day 3 and 7; proportion of inpatients and outpatients not specified | Chan WS, Chumilal SD, Lee AYY, Crowther M, Rodger M, Ginsberg JS. A red blood cell agglutination D-dimer test to exclude deep venous thrombosis in pregnancy. <i>Ann Intern Med.</i> 2007;147:165-170 |

(Continued)

**Table S50—Continued**

| Question from Structured Clinical Question Table | Clinical Situation/ Question                                                              | Meta-analysis vs Primary Study | Reference Standard | Patient Population                                  | Outcome Measure <sup>a</sup> | Result                          | Comments                                                                                                                                                                                                                                                                                                                                                                                                                  | Reference                                                                                                                                                                                                                                                                                   |
|--------------------------------------------------|-------------------------------------------------------------------------------------------|--------------------------------|--------------------|-----------------------------------------------------|------------------------------|---------------------------------|---------------------------------------------------------------------------------------------------------------------------------------------------------------------------------------------------------------------------------------------------------------------------------------------------------------------------------------------------------------------------------------------------------------------------|---------------------------------------------------------------------------------------------------------------------------------------------------------------------------------------------------------------------------------------------------------------------------------------------|
|                                                  | What are the consequences of using a single complete US to exclude pregnancy-related DVT? | Primary, cohort management     | 3-mo follow-up     | Pregnant and postpartum patients with suspected DVT | NPV                          | NPV, 100% (95% CI, 96.4%-100%)  | N = 162; retrospective cohort study. Eighty-two women were postpartum; 25 women were diagnosed with DVT at presentation; 19 women received anticoagulant therapy despite US that demonstrated no DVT (muscular or superficial thrombosis); 3 additional women received extended (≥6 wk) postpartum prophylaxis were excluded from analysis; 11 women discharged without anticoagulant therapy (9%) were lost to follow-up | Le Gal, Prins A-M, Righini M, et al. Diagnostic value of a negative single complete compression ultrasound of the lower limbs to exclude the diagnosis of deep venous thrombosis in pregnant or postpartum women: a retrospective hospital based study. <i>Thromb Res.</i> 2006;118:691-697 |
|                                                  |                                                                                           | Primary, cohort management     | 3-mo follow-up     | Pregnant and postpartum patients with suspected DVT | NPV                          | NPV, 98.2 (95% CI, 94.9%-99.4%) | N = 194; prospective cohort study. Patient population included an unspecified number of postpartum women. Prevalence of DVT was 9.3%; proportion of calf thrombosis not specified. Three patients received full-dose anticoagulants despite negative US results.                                                                                                                                                          | Le Gal G, Righini M, Kercet L, et al. Diagnosis of deep vein thrombosis by compression ultrasonography during pregnancy and the postpartum period: a management study [abstract]. <i>J Thromb Haemost.</i> 2009; 7 (2): abstract PP-TT-508                                                  |

(Continued)

**Table S50—Continued**

| Question from Structured Clinical Question Table                                            | Clinical Situation/ Question | Meta-analysis vs Primary Study | Reference Standard     | Patient Population                   | Outcome Measure <sup>a</sup> | Result                                                                                                      | Comments                                                                                                                                                                               | Reference                                                                                                                                                                                        |
|---------------------------------------------------------------------------------------------|------------------------------|--------------------------------|------------------------|--------------------------------------|------------------------------|-------------------------------------------------------------------------------------------------------------|----------------------------------------------------------------------------------------------------------------------------------------------------------------------------------------|--------------------------------------------------------------------------------------------------------------------------------------------------------------------------------------------------|
| What are the consequences of using a clinical score to diagnose pregnancy-related DVT?      |                              | Primary, cohort accuracy       | CUS and 3-mo follow-up | Pregnant patients with suspected DVT | Specificity                  | Specificity (for one or more variables) 50% (43%-58%)                                                       | N = 194 (prevalence 8.8%)                                                                                                                                                              | Chan WS, Lee A, Spencer FA, et al. Predicting deep venous thrombosis in pregnancy: out in "LEFT" field? <i>Ann Intern Med.</i> 2009;151:95-92                                                    |
|                                                                                             |                              |                                |                        |                                      | Positive LR                  | LR positive, 2.0 (1.7-2.3)                                                                                  |                                                                                                                                                                                        |                                                                                                                                                                                                  |
| What are the consequences of using a clinical score to exclude pregnancy-related DVT?       |                              | Primary, cohort accuracy       | CUS and 3-mo follow-up | Pregnant patients with suspected DVT | Sensitivity                  | Sensitivity 100% (81%-100%)                                                                                 | N = 194 (prevalence 8.8%)                                                                                                                                                              | Chan WS, Lee A, Spencer FA, et al. Predicting deep venous thrombosis in pregnancy: out in "LEFT" field? <i>Ann Intern Med.</i> 2009;151:95-92                                                    |
|                                                                                             |                              |                                |                        |                                      | Negative LR                  | LR negative, 0 (0-0)                                                                                        |                                                                                                                                                                                        |                                                                                                                                                                                                  |
| What are the consequences of using a highly sensitive DD to diagnose pregnancy-related DVT? |                              | Primary, cohort accuracy       | CUS and 3-mo follow-up | Pregnant patients with suspected DVT | Specificity                  | VIDAS DD, $\mu\text{g}$ FEU/mL<br>Traditional (0.5)<br>10.3 (6.6-15.5)<br>Pregnancy (1.89) 78.8 (72.7-84.1) | N = 228 (prevalence 6.6%, n = 15). Five highly sensitive DD assays evaluated. Frozen samples. Cut-point based on ROC analysis. Proportion of inpatients and outpatients not specified. | Chan WS, Lee A, Spencer FA, et al. D-Dimer testing in pregnant patients: toward determining the next "level" in the diagnosis of deep vein thrombosis. <i>J Thromb Haemost.</i> 2010;8:1004-1011 |
|                                                                                             |                              |                                |                        |                                      | Negative LR                  | LR negative, 0 (0-0)                                                                                        |                                                                                                                                                                                        |                                                                                                                                                                                                  |

(Continued)

**Table S50—Continued**

| Question from Structured Clinical Question Table | Clinical Situation/ Question | Meta-analysis vs Primary Study | Reference Standard | Patient Population | Outcome Measure <sup>a</sup> | Result                                    | Comments | Reference |
|--------------------------------------------------|------------------------------|--------------------------------|--------------------|--------------------|------------------------------|-------------------------------------------|----------|-----------|
|                                                  |                              |                                |                    |                    |                              | Asserachrome, $\mu\text{g}$ FEU/mL        |          |           |
|                                                  |                              |                                |                    |                    |                              | Traditional<br>(0.5) 12.3<br>(8.3-17.8)   |          |           |
|                                                  |                              |                                |                    |                    |                              | Pregnancy<br>(1.51) 73.9<br>(67.5-79.7)   |          |           |
|                                                  |                              |                                |                    |                    |                              | IL Test, $\mu\text{g}$ DD/mL              |          |           |
|                                                  |                              |                                |                    |                    |                              | Traditional<br>(0.23) 17.8<br>(13.0-24.0) |          |           |
|                                                  |                              |                                |                    |                    |                              | Pregnancy<br>(0.57) 74.8<br>(68.3-80.5)   |          |           |
|                                                  |                              |                                |                    |                    |                              | STA-Lia, $\mu\text{g}$ FEU/mL             |          |           |
|                                                  |                              |                                |                    |                    |                              | Traditional<br>(0.5) 22.9<br>(17.5-29.4)  |          |           |
|                                                  |                              |                                |                    |                    |                              | Pregnancy<br>(1.38) 75.6<br>(69.3-81.2)   |          |           |
|                                                  |                              |                                |                    |                    |                              | Innovance, $\mu\text{g}$ FEU/mL           |          |           |
|                                                  |                              |                                |                    |                    |                              | Traditional<br>(0.5) 6.2<br>(3.5-10.6)    |          |           |
|                                                  |                              |                                |                    |                    |                              | Pregnancy<br>(1.5) 61.2<br>(54.3-67.8)    |          |           |

(Continued)

**Table S50—Continued**

| Question from Structured Clinical Question Table | Clinical Situation/ Question                                                               | Meta-analysis vs Primary Study | Reference Standard     | Patient Population                   | Outcome Measure | Result                                                                                                                                                                                                                                                                                                                                                                                                                                                                                                                                            | Comments                                                                                                                                                                               | Reference                                                                                                                                                                                        |
|--------------------------------------------------|--------------------------------------------------------------------------------------------|--------------------------------|------------------------|--------------------------------------|-----------------|---------------------------------------------------------------------------------------------------------------------------------------------------------------------------------------------------------------------------------------------------------------------------------------------------------------------------------------------------------------------------------------------------------------------------------------------------------------------------------------------------------------------------------------------------|----------------------------------------------------------------------------------------------------------------------------------------------------------------------------------------|--------------------------------------------------------------------------------------------------------------------------------------------------------------------------------------------------|
|                                                  | What are the consequences of using a highly sensitive DD to exclude pregnancy-related DVT? | Primary, cohort accuracy       | CUS and 3-mo follow-up | Pregnant patients with suspected DVT | Sensitivity     | VIDAS DD, $\mu\text{g FEU/mL}$<br>Traditional (0.5) 100 (74.7-100)<br>Pregnancy (1.89) 93.3 (68.1-99.8)<br>Asserachrome, $\mu\text{g FEU/mL}$<br>Traditional (0.5) 100 (74.7-100)<br>Pregnancy (1.51) 100 (78.2-100)<br>IL Test, $\mu\text{g DD/mL}$<br>Traditional (0.23) 100 (74.7-100)<br>Pregnancy (0.57) 80.0 (51.9-95.7)<br>STA-Lia, $\mu\text{g FEU/mL}$<br>Traditional (0.5) 100 (74.7-100)<br>Pregnancy (1.38) 93.3 (68.1-99.8)<br>Innovance, $\mu\text{g FEU/mL}$<br>Traditional (0.5) 100 (74.7-100)<br>Pregnancy (1.5) 100 (74.7-100) | N = 228 (prevalence 6.6%, n = 15). Five highly sensitive DD assays evaluated. Frozen samples. Cut-point based on ROC analysis. Proportion of inpatients and outpatients not specified. | Chan WS, Lee A, Spencer FA, et al. D-Dimer testing in pregnant patients: toward determining the next "level" in the diagnosis of deep vein thrombosis. <i>J Thromb Haemost.</i> 2010;8:1004-1011 |

(Continued)



**Table S50—Continued**

| Question from Structured Clinical Question Table | Clinical Situation/ Question                                                                    | Meta-analysis vs Primary Study | Reference Standard     | Patient Population                   | Outcome Measure <sup>a</sup> | Result                                                                                                                                                                                                                                                                                                                                                                                                          | Comments                                                                                                                     | Reference                                                                                                                                                                                             |
|--------------------------------------------------|-------------------------------------------------------------------------------------------------|--------------------------------|------------------------|--------------------------------------|------------------------------|-----------------------------------------------------------------------------------------------------------------------------------------------------------------------------------------------------------------------------------------------------------------------------------------------------------------------------------------------------------------------------------------------------------------|------------------------------------------------------------------------------------------------------------------------------|-------------------------------------------------------------------------------------------------------------------------------------------------------------------------------------------------------|
|                                                  |                                                                                                 |                                |                        |                                      | Negative LR                  | VIDAS DD, $\mu\text{g FEU/mL}$<br>Traditional (0.5) 0.09 (0.01-0.56)<br>Asserachrome, $\mu\text{g FEU/mL}$<br>Traditional (0.5) 0 (Not calculable)<br>IL Test, $\mu\text{g DD/mL}$<br>Traditional (0.23) 0.27 (0.1-0.74)<br>STA-Lia, $\mu\text{g FEU/mL}$<br>Traditional (0.5) 0.09 (0.01-0.59)<br>Pregnancy (1.38) 75.6 (69.3-81.2)<br>Innovance, $\mu\text{g FEU/mL}$<br>Traditional (0.5) 0 (Not calculable) |                                                                                                                              |                                                                                                                                                                                                       |
|                                                  | What are the consequences of using a moderately sensitive DD to diagnose pregnancy-related DVT? | Primary, cohort accuracy       | CUS and 3-mo follow-up | Pregnant patients with suspected DVT | Specificity                  | Specificity 60% (52%-68%)<br>Positive LR 2.5 (2.0-3.1)<br>Negative LR 0.2 (0.1-0.4)                                                                                                                                                                                                                                                                                                                             | N = 149 (prevalence 8.7%, n = 13) SimpliRED DD used. Frozen samples. Proportion of inpatients and outpatients not specified. | Chan WS, Chumilal SD, Lee AYY, Crowther M, Rodger M, Ginsberg JS. A red blood cell agglutination D-dimer test to exclude deep venous thrombosis in pregnancy. <i>Ann Intern Med.</i> 2007;147:165-170 |

(Continued)

**Table S50—Continued**

| Question from Structured Clinical Question Table | Clinical Situation/ Question                                                                   | Meta-analysis vs Primary Study | Reference Standard     | Patient Population                   | Outcome Measure <sup>a</sup> | Result                                                | Comments                                                                                                                     | Reference                                                                                                                                                                                             |
|--------------------------------------------------|------------------------------------------------------------------------------------------------|--------------------------------|------------------------|--------------------------------------|------------------------------|-------------------------------------------------------|------------------------------------------------------------------------------------------------------------------------------|-------------------------------------------------------------------------------------------------------------------------------------------------------------------------------------------------------|
|                                                  | What are the consequences of using a moderately sensitive DD to exclude pregnancy-related DVT? | Primary, cohort accuracy       | CUS and 3-mo follow-up | Pregnant patients with suspected DVT | Sensitivity<br>Negative LR   | Sensitivity 100% (77%-100%)<br>LR negative, 0 (0-0.9) | N = 149 (prevalence 8.7%, n = 13) SimpliRED DD used. Frozen samples. Proportion of inpatients and outpatients not specified. | Chan WS, Chumilal SD, Lee AYY, Crowther M, Rodger M, Ginsberg JS. A red blood cell agglutination D-dimer test to exclude deep venous thrombosis in pregnancy. <i>Ann Intern Med.</i> 2007;147:165-170 |
|                                                  | What are the consequences of using CT scan venography to diagnose DVT during pregnancy?        | N/A                            | N/A                    | Pregnant patients with suspected DVT | N/A                          | N/A                                                   | N/A                                                                                                                          | N/A                                                                                                                                                                                                   |
|                                                  | What are the consequences of using CT scan venography to exclude DVT during pregnancy?         | N/A                            | N/A                    | Pregnant patients with suspected DVT | N/A                          | N/A                                                   | N/A                                                                                                                          | N/A                                                                                                                                                                                                   |
|                                                  | What are the consequences of using contrast MR venography to diagnose DVT during pregnancy?    | N/A                            | N/A                    | Pregnant patients with suspected DVT | N/A                          | N/A                                                   | N/A                                                                                                                          | N/A                                                                                                                                                                                                   |
|                                                  | What are the consequences of using MR venography to exclude DVT during pregnancy?              | N/A                            | N/A                    | Pregnant patients with suspected DVT | N/A                          | N/A                                                   | N/A                                                                                                                          | N/A                                                                                                                                                                                                   |

ROC = receiver operator curve. See Table S1-S3, S7, and S10 legends for expansion of other abbreviations.

<sup>a</sup>eg. Post-TP during 3 mo follow-up; sensitivity or specificity; and so forth.

**Table S51—[Sections 5.1-5.3] Evidence Profile: Should Serial Negative CUSs of the Proximal Veins and Calf Trifurcation (With Imaging of the Iliac Veins in Symptomatic Women) Be Used to Exclude DVT During Pregnancy?**

| No. of Studies (Patients) | Quality Assessment            |                      |               |              |             |                         |                              | Summary of Findings                                              |          |
|---------------------------|-------------------------------|----------------------|---------------|--------------|-------------|-------------------------|------------------------------|------------------------------------------------------------------|----------|
|                           | Design                        | Limitations          | Inconsistency | Indirectness | Imprecision | Other Considerations    | Accuracy Indices, % (95% CI) | CUS of Proximal Veins and Calf Trifurcation ( $\pm$ Iliac Veins) | Quality  |
| 1 (149)                   | Single-arm prospective cohort | Serious <sup>a</sup> | Single study  | N/A          | Serious     | Prevalence of DVT, 8.7% | 99.3 (96.0-99.9)             |                                                                  | Moderate |

NPV for pregnancy-related DVT compared with 3 mo of clinical follow-up

**Bibliography:** Chan WS, Chumilal SD, Lee AYY, Crowther M, Rodger M, Ginsberg JS. A red blood cell agglutination D-dimer test to exclude deep venous thrombosis in pregnancy. *Ann Intern Med.* 2007;147:165-170. Settings: not stated. See Table S3 and S7 legends for expansion of abbreviations.

<sup>a</sup>The proportion of patients who underwent single CUS vs those who underwent serial testing on days 3 and 7 not specified.

**Table S52—[Sections 5.1-5.3] Evidence Profile: Should a Negative Complete US Be Used to Exclude DVT During Pregnancy?**

| No. of Studies (Patients) | Design                        | Quality Assessment                                                       |               |                      |             |                                                                            | Other considerations | Summary of Findings            |
|---------------------------|-------------------------------|--------------------------------------------------------------------------|---------------|----------------------|-------------|----------------------------------------------------------------------------|----------------------|--------------------------------|
|                           |                               | Limitations                                                              | Inconsistency | Indirectness         | Imprecision | Accuracy Indices, % (95% CI)                                               |                      |                                |
| 2 Studies                 |                               | NPV for DVT during pregnancy as compared with 3 mo of clinical follow-up |               |                      |             |                                                                            |                      | Complete US                    |
|                           |                               | Very serious <sup>a</sup>                                                | None          | Serious <sup>b</sup> | Serious     | Prevalence of DVT in retrospective study 15.4%; in prospective study 9.3%. |                      | Low                            |
| Study 1 (162)             | Study 1: retrospective cohort |                                                                          |               |                      |             |                                                                            |                      | Study 1: NPV, 100 (96.4-100)   |
| Study 2 (194)             | Study 2: prospective cohort   |                                                                          |               |                      |             |                                                                            |                      | Study 2: NPV, 98.2 (94.9-99.4) |

**Bibliography:** Le Gal, Prins A-M, Righini M, et al. Diagnostic value of a negative single complete compression ultrasound of the lower limbs to exclude the diagnosis of deep venous thrombosis in pregnant or postpartum women: a retrospective hospital based study. *Thromb Res.* 2006;118:691-697. Le Gal G, Righini M, Kerret L, et al. Diagnosis of deep vein thrombosis by compression ultrasonography during pregnancy and the postpartum period: a management study [abstract]. *J Thromb Haemost.* 2009;7 (2):abstract PP-TH-508. Settings: not stated. See Table S1 and S3 legends for expansion of abbreviations.

<sup>a</sup> In retrospective study, 51% of women were postpartum. Of 137 women without DVT at presentation, 19 women received anticoagulant therapy on the basis of USs that demonstrated muscular or superficial thrombosis; three additional women who received extended ( $\geq 6$  wk) postpartum prophylaxis were excluded from analysis; 11 women discharged without anticoagulant therapy (9%) were lost to follow-up. Prospective study published only in abstract. An unspecified number of women in this study were postpartum. Of 176 women without DVT at presentation, three patients received full-dose anticoagulants despite negative US results. Follow-up only available on 167 women.

<sup>b</sup> A substantial proportion of the study population was postpartum.

**Table S53—[Sections 5.1-5.3] Evidence Profile: Should a Clinical Model Be Used to Evaluate Pregnant Patients With Suspected DVT?**

| Outcome                                                       | No. of Studies   | Study Design    | Limitations <sup>a</sup> | Inconsistency <sup>b</sup> | Indirectness <sup>c</sup> | Imprecision <sup>d</sup> | Final Quality | Effect/1,000 <sup>e</sup>                           |
|---------------------------------------------------------------|------------------|-----------------|--------------------------|----------------------------|---------------------------|--------------------------|---------------|-----------------------------------------------------|
| True positive (patients with DVT)                             | 1 (195 patients) | Accuracy cohort | Very serious             | N/A                        | Serious                   | Very serious             | Low           | Prev 24.6%: 246<br>Prev 8.7%: 87<br>Prev 1.5%: 15   |
| True negative (patients without DVT)                          |                  |                 |                          |                            |                           |                          |               | Prev 24.6%: 377<br>Prev 8.7%: 457<br>Prev 1.5%: 493 |
| False negative (patients incorrectly classified DVT negative) |                  |                 |                          |                            |                           |                          |               | Prev 24.6%: 0<br>Prev 8.7%: 0<br>Prev 1.5%: 0       |
| False positive (patients incorrectly classified DVT positive) |                  |                 |                          |                            |                           |                          |               | Prev 24.6%: 377<br>Prev 8.7%: 456<br>Prev 1.5%: 492 |

Bibliography: Chan WS, Lee A, Spencer FA, et al. Predicting deep venous thrombosis in pregnancy: out in "LEFT" field? *Ann Intern Med.* 2009;151:85-92. Setting: Suspected pregnancy-related DVT. Reference test: proximal CUS and 3 mo follow-up. See Table S3 and S7 legends for expansion of abbreviations.

<sup>a</sup>Setting not stated, not clearly a sample of consecutive patients, accepted reference standard not used, reference standard results no blinded, internal validation only, small number of events (17).

<sup>b</sup>Single study.

<sup>c</sup>Accuracy study.

<sup>d</sup>Wide 95% CIs.

<sup>e</sup>Based on a specificity of 50% (95% CI, 43%-58%) for absence of left leg symptoms, difference in calf circumference of at least 2 cm, and first trimester presentation and sensitivity of 100% (95% CI, 71%-100%) for at least one of these characteristics. Prevalences taken from Chan et al.

**Table S54—[Sections 5.1-5.3] Evidence Profile: Should a High Sensitivity DD (Standard Threshold) Be Used to Evaluate Pregnant Patients With Suspected DVT?**

| Outcome                                                             | No. of Studies   | Study Design    | Limitations <sup>a</sup> | Inconsistency <sup>b</sup> | Indirectness <sup>c</sup> | Imprecision <sup>d</sup> | Final Quality | Effect/1,000 <sup>e</sup>                           |
|---------------------------------------------------------------------|------------------|-----------------|--------------------------|----------------------------|---------------------------|--------------------------|---------------|-----------------------------------------------------|
| True positive<br>(patients with DVT)                                | 1 (249 patients) | Accuracy cohort | Very serious             | N/A                        | Serious                   | Very serious             | Low           | Prev 24.6%: 246<br>Prev 8.7%: 87<br>Prev 1.5%: 15   |
| True negative<br>(patients without DVT)                             |                  |                 |                          |                            |                           |                          |               | Prev 24.6%: 78<br>Prev 8.7%: 94<br>Prev 1.5%: 101   |
| False negative<br>(patients incorrectly<br>classified DVT negative) |                  |                 |                          |                            |                           |                          |               | Prev 24.6%: 0<br>Prev 8.7%: 0<br>Prev 1.5%: 0       |
| False positive<br>(patients incorrectly<br>classified DVT positive) |                  |                 |                          |                            |                           |                          |               | Prev 24.6%: 676<br>Prev 8.7%: 819<br>Prev 1.5%: 884 |

Bibliography: Chan WS, Lee A, Spencer FA, et al. D-Dimer testing in pregnant patients: toward determining the next “level” in the diagnosis of deep vein thrombosis. *J Thromb Haemost.* 2010;8:1004-1011. Setting: suspected pregnancy-related DVT. Reference test: proximal CUS and 3 mo follow-up. See Table S1, S3, and S7 legends for expansion of abbreviations.

<sup>a</sup>Setting not stated, not clearly a sample of consecutive patients, accepted reference standard not used, frozen samples, small number of events (15).

<sup>b</sup>Single study.

<sup>c</sup>Accuracy study.

<sup>d</sup>Wide 95% CIs.

<sup>e</sup>Based on a specificity of 10.3% (95% CI, 6.6%-15.5%) and sensitivity of 100% (95% CI, 74.7%-100%) for the VIDAS DD using the standard cut-point of 0.5 µg FEU/mL. Prevalences taken from Chan et al.

**Table S55—[Sections 5.1-5.3] Evidence Profile: Should a Moderately Sensitive DD Be Used to Evaluate Pregnant Patients With Suspected DVT?**

| Outcome                                                       | No. of Studies   | Study Design    | Limitations <sup>a</sup> | Inconsistency <sup>b</sup> | Indirectness <sup>c</sup> | Imprecision <sup>d</sup> | Final Quality | Effect/1,000 <sup>e</sup>                           |
|---------------------------------------------------------------|------------------|-----------------|--------------------------|----------------------------|---------------------------|--------------------------|---------------|-----------------------------------------------------|
| True positive (patients with DVT)                             | 1 (149 patients) | Accuracy cohort | Serious                  | N/A                        | Serious                   | Very serious             | Low           | Prev 24.6%: 247<br>Prev 8.7%: 87<br>Prev 1.5%: 15   |
| True negative (patients without DVT)                          |                  |                 |                          |                            |                           |                          |               | Prev 24.6%: 452<br>Prev 8.7%: 548<br>Prev 1.5%: 591 |
| False negative (patients incorrectly classified DVT negative) |                  |                 |                          |                            |                           |                          |               | Prev 24.6%: 0<br>Prev 8.7%: 0<br>Prev 1.5%: 0       |
| False positive (patients incorrectly classified DVT positive) |                  |                 |                          |                            |                           |                          |               | Prev 24.6%: 302<br>Prev 8.7%: 306<br>Prev 1.5%: 394 |

Bibliography: Chan WS, Chumilal SD, Lee AYY, Crowther M, Rodger M, Ginsberg JS. A red blood cell agglutination D-dimer test to exclude deep venous thrombosis in pregnancy. *Ann Intern Med*. 2007;147:165-170. Setting: Suspected pregnancy-related DVT. Reference test: proximal CUS and 3-mo follow-up. See Table S1, S3, and S7 legends for expansion of abbreviations.

<sup>a</sup>Accepted reference standard not used, frozen samples, small number of events (13).

<sup>b</sup>Single study.

<sup>c</sup>Accuracy study.

<sup>d</sup>Wide 95% CIs.

<sup>e</sup>Based on a specificity of 60% (95% CI, 52%-68%) and sensitivity of 100% (95% CI, 77%-100%) for the SimpliRED DD. Prevalences taken from Chan et al.

**Table S56—[Section 6.2] Methodology of Diagnostic Studies in Patients With Suspected Upper Extremity DVT: Meta-analysis of Accuracy Studies**

| Patient Population            | Study Eligibility  |                              | Exploration of Heterogeneity                                                                                                  | Source                                                                                                                                                                                                                          |
|-------------------------------|--------------------|------------------------------|-------------------------------------------------------------------------------------------------------------------------------|---------------------------------------------------------------------------------------------------------------------------------------------------------------------------------------------------------------------------------|
|                               | Diagnostic Test    | Outcome (Criterion Standard) |                                                                                                                               |                                                                                                                                                                                                                                 |
| Suspected upper extremity DVT | CUS                | Venography                   | Could not test for influence of study design characteristics given limited number of studies available for each specific test | Di Nisio M, van Sluis GL, Bossnyk PM, Buller HR, Porreca E, Rutjes AW. Accuracy of diagnostic tests for clinically suspected upper extremity deep vein thrombosis: a systematic review. <i>J Thromb Haemost.</i> 2010;8:684-692 |
|                               | Doppler US and CUS | Venography                   |                                                                                                                               |                                                                                                                                                                                                                                 |

All studies are cross-sectional. See Table S1 and S7 for expansion of abbreviations.



**Table S57—[Section 6.2] Methodology of Diagnostic Studies in Patients With Suspected Upper Extremity DVT: Individual Accuracy Studies**

| Study Details                 |                 |                              |                      |                                                   |                                                         |                                                                                                                                                                                                                 |
|-------------------------------|-----------------|------------------------------|----------------------|---------------------------------------------------|---------------------------------------------------------|-----------------------------------------------------------------------------------------------------------------------------------------------------------------------------------------------------------------|
| Patient Population            | Diagnostic Test | Outcome (Criterion Standard) | Consecutive Patients | Independent Test Assessment                       | Comments                                                | Source                                                                                                                                                                                                          |
| Suspected upper extremity DVT | Clinical model  | Duplex US                    | Not stated           | Reference standard results not blinded            | Failure to use accepted reference standard (venography) | Constans J, Salmi L-R, Sevestre-Pietri M-A, et al. A clinical prediction score for upper extremity deep venous thrombosis. <i>Thromb Haemost.</i> 2008;99:202-207.                                              |
| Suspected upper extremity DVT | VIDAS DD        | CT scan; Duplex US           | Yes                  | Blinding of criterion and diagnostic test unclear | Failure to use accepted reference standard (venography) | Merminod T, Pellicciotta S, Bounameaux H. Limited usefulness of D-dimer in suspected deep vein thrombosis of the upper extremities. <i>Blood Coagul Fibrinolysis.</i> 2006;17:225-227                           |
| Suspected upper extremity DVT | MRI             | Venography                   | Yes                  | Yes                                               | 10 of 31 Patients unable to undergo diagnostic tests    | Baarslag H-J, van Beek EJR, Reekers JA. Magnetic resonance venography in consecutive patients with suspected deep vein thrombosis of the upper extremity: initial experience. <i>Acta Radiol.</i> 2004;45:38-43 |

In addition to meta-analysis, all studies are cross-sectional unless otherwise indicated under Comments.

**Table S58—[Sections 6.1, 6.2] Description and Results of Diagnostic Studies in Patients with Suspected Upper Extremity DVT**

| Question from Structured Clinical Question Table | Clinical Situation/ Question                                                    | Meta-analysis vs Primary Study | Reference Standard | Patient Population                          | Outcome Measure <sup>a</sup> | Result                     | Comments                   | Reference                                                                                                                                                                                                                                                                        |
|--------------------------------------------------|---------------------------------------------------------------------------------|--------------------------------|--------------------|---------------------------------------------|------------------------------|----------------------------|----------------------------|----------------------------------------------------------------------------------------------------------------------------------------------------------------------------------------------------------------------------------------------------------------------------------|
| Suspected upper extremity DVT (Section 6.0)      | What are the consequences of using venography to diagnose upper extremity DVT?  | N/A                            | N/A                | Patients with suspected upper extremity DVT | N/A                          | N/A                        | Implied reference standard | Di Nisio M, van Sluis GL, Bossuyt PM, Buller HR, Porreca E, Rutjes AW. Accuracy of diagnostic tests for clinically suspected upper extremity deep vein thrombosis: a systematic review. <i>J Thromb Haemost.</i> 2010;8:684-692                                                  |
|                                                  | What are the consequences of using venography to rule out upper extremity DVT?  | N/A                            | N/A                | Patients with suspected upper extremity DVT | N/A                          | N/A                        | Implied reference standard |                                                                                                                                                                                                                                                                                  |
|                                                  | What are the consequences of using CUS to diagnose upper extremity DVT?         | Meta-analysis                  | Venography         | Patients with suspected upper extremity DVT | Specificity                  | Specificity 96% (87%-100%) | 2 studies; N = 65 patients | Prandoni P, Polistena P, Bernardi E, et al. Upper extremity deep vein thrombosis. Risk factors, diagnosis, and complications. <i>Arch Intern Med.</i> 1997;157:57-62. Sullivan ED, Peter DJ, Cranley JJ. Real-time B-mode venous ultrasound. <i>J Vasc Surg.</i> 1984;1:365-571. |
|                                                  | What are the consequences of using a single CUS to exclude upper extremity DVT? | Meta-analysis                  | Venography         | Patients with suspected upper extremity DVT | Sensitivity                  | Sensitivity 97% (90%-100%) | 2 studies; N = 65 patients | Prandoni P, Polistena P, Bernardi E, et al. Upper extremity deep vein thrombosis. Risk factors, diagnosis, and complications. <i>Arch Intern Med.</i> 1997;157:57-62. Sullivan ED, Peter DJ, Cranley JJ. Real-time B-mode venous ultrasound. <i>J Vasc Surg.</i> 1984;1:365-571. |
|                                                  | What are the consequences of using serial CUS to exclude upper extremity DVT?   | N/A                            | N/A                | Patients with suspected upper extremity DVT | N/A                          | N/A                        | No studies with serial USS | Di Nisio M, van Sluis GL, Bossuyt PM, Buller HR, Porreca E, Rutjes AW. Accuracy of diagnostic tests for clinically suspected upper extremity deep vein thrombosis: a systematic review. <i>J Thromb Haemost.</i> 2010;8:684-692.                                                 |

(Continued)

**Table S58—Continued**

| Question from Structured Clinical Question Table | Clinical Situation/ Question                                                                 | Meta-analysis vs Primary Study | Reference Standard | Patient Population                          | Outcome Measure <sup>a</sup> | Result                     | Comments                          | Reference                                                                                                                                                                                                                        |
|--------------------------------------------------|----------------------------------------------------------------------------------------------|--------------------------------|--------------------|---------------------------------------------|------------------------------|----------------------------|-----------------------------------|----------------------------------------------------------------------------------------------------------------------------------------------------------------------------------------------------------------------------------|
|                                                  | What are the consequences of using Doppler US to diagnose upper extremity DVT?               | Meta-analysis                  | Venography         | Patients with suspected upper extremity DVT | Specificity                  | Specificity 94% (86%-100%) | 3 studies; N = 101 patients       | Di Nisio M, van Sluis GL, Bossuyt PM, Buller HR, Porreca E, Rutjes AW. Accuracy of diagnostic tests for clinically suspected upper extremity deep vein thrombosis: a systematic review. <i>J Thromb Haemost.</i> 2010;8:684-692. |
|                                                  | What are the consequences of using a single Doppler US to exclude upper extremity DVT?       | Meta-analysis                  | Venography         | Patients with suspected upper extremity DVT | Sensitivity                  | Sensitivity 84% (72%-97%)  | 3 studies; N = 101 patients       | Di Nisio M, van Sluis GL, Bossuyt PM, Buller HR, Porreca E, Rutjes AW. Accuracy of diagnostic tests for clinically suspected upper extremity deep vein thrombosis: a systematic review. <i>J Thromb Haemost.</i> 2010;8:684-692. |
|                                                  | What are the consequences of using serial Doppler US to exclude upper extremity DVT?         | N/A                            | N/A                | Patients with suspected upper extremity DVT | N/A                          | N/A                        | No studies with serial Doppler US | Di Nisio M, van Sluis GL, Bossuyt PM, Buller HR, Porreca E, Rutjes AW. Accuracy of diagnostic tests for clinically suspected upper extremity deep vein thrombosis: a systematic review. <i>J Thromb Haemost.</i> 2010;8:684-692. |
|                                                  | What are the consequences of using CUS plus Doppler to diagnose upper extremity DVT?         | Meta-analysis                  | Venography         | Patients with suspected upper extremity DVT | Specificity                  | Specificity 93% (80%-100%) | 6 studies; N = 320 patients       | Di Nisio M, van Sluis GL, Bossuyt PM, Buller HR, Porreca E, Rutjes AW. Accuracy of diagnostic tests for clinically suspected upper extremity deep vein thrombosis: a systematic review. <i>J Thromb Haemost.</i> 2010;8:684-692. |
|                                                  | What are the consequences of using a single CUS plus Doppler to exclude upper extremity DVT? | Meta-analysis                  | Venography         | Patients with suspected upper extremity DVT | Sensitivity                  | Sensitivity 91% (85%-97%)  | 6 studies; N = 320 patients       | Di Nisio M, van Sluis GL, Bossuyt PM, Buller HR, Porreca E, Rutjes AW. Accuracy of diagnostic tests for clinically suspected upper extremity deep vein thrombosis: a systematic review. <i>J Thromb Haemost.</i> 2010;8:684-692. |

(Continued)

**Table S58—Continued**

| Question from Structured Clinical Question Table | Clinical Situation/ Question                                                                                   | Meta-analysis vs Primary Study | Reference Standard | Patient Population                          | Outcome Measure <sup>a</sup> | Result | Comments                                     | Reference                                                                                                                                                                                                                        |
|--------------------------------------------------|----------------------------------------------------------------------------------------------------------------|--------------------------------|--------------------|---------------------------------------------|------------------------------|--------|----------------------------------------------|----------------------------------------------------------------------------------------------------------------------------------------------------------------------------------------------------------------------------------|
|                                                  | What are the consequences of using a serial CUS plus Doppler to exclude upper extremity DVT?                   | N/A                            | N/A                | Patients with suspected upper extremity DVT | N/A                          | N/A    | No studies with serial duplex US             | Di Nisio M, van Sluis GL, Bossuyt PM, Buller HR, Porreca E, Rutjes AW. Accuracy of diagnostic tests for clinically suspected upper extremity deep vein thrombosis: a systematic review. <i>J Thromb Haemost.</i> 2010;8:684-692. |
|                                                  | What are the consequences of using a negative CUS and negative DD to exclude upper extremity DVT?              | N/A                            | N/A                | Patients with suspected upper extremity DVT | N/A                          | N/A    | No studies using a combination of US and DD  | Di Nisio M, van Sluis GL, Bossuyt PM, Buller HR, Porreca E, Rutjes AW. Accuracy of diagnostic tests for clinically suspected upper extremity deep vein thrombosis: a systematic review. <i>J Thromb Haemost.</i> 2010;8:684-692. |
|                                                  | What are the consequences of using a negative Doppler US and negative DD to exclude upper extremity DVT?       | N/A                            | N/A                | Patients with suspected upper extremity DVT | N/A                          | N/A    | No studies using a combination of US and DD  | Di Nisio M, van Sluis GL, Bossuyt PM, Buller HR, Porreca E, Rutjes AW. Accuracy of diagnostic tests for clinically suspected upper extremity deep vein thrombosis: a systematic review. <i>J Thromb Haemost.</i> 2010;8:684-692. |
|                                                  | What are the consequences of using a negative CUS plus Doppler and negative DD to exclude upper extremity DVT? | N/A                            | N/A                | Patients with suspected upper extremity DVT | N/A                          | N/A    | No studies using a combination of US and DD  | Di Nisio M, van Sluis GL, Bossuyt PM, Buller HR, Porreca E, Rutjes AW. Accuracy of diagnostic tests for clinically suspected upper extremity deep vein thrombosis: a systematic review. <i>J Thromb Haemost.</i> 2010;8:684-692. |
|                                                  | What are the consequences of using low PTP with a negative CUS to exclude upper extremity DVT?                 | N/A                            | N/A                | Patients with suspected upper extremity DVT | N/A                          | N/A    | No studies using a combination of PTP and US | Di Nisio M, van Sluis GL, Bossuyt PM, Buller HR, Porreca E, Rutjes AW. Accuracy of diagnostic tests for clinically suspected upper extremity deep vein thrombosis: a systematic review. <i>J Thromb Haemost.</i> 2010;8:684-692. |

(Continued)

**Table S58—Continued**

| Question from Structured Clinical Question Table | Clinical Situation/ Question                                                                                                                    | Meta-analysis vs Primary Study | Reference Standard | Patient Population                          | Outcome Measure <sup>a</sup> | Result | Comments                                     | Reference                                                                                                                                                                                                                        |
|--------------------------------------------------|-------------------------------------------------------------------------------------------------------------------------------------------------|--------------------------------|--------------------|---------------------------------------------|------------------------------|--------|----------------------------------------------|----------------------------------------------------------------------------------------------------------------------------------------------------------------------------------------------------------------------------------|
|                                                  | What are the consequences of using low PTP with a negative Doppler US to exclude upper extremity DVT?                                           | N/A                            | N/A                | Patients with suspected upper extremity DVT | N/A                          | N/A    | No studies using a combination of PTP and US | Di Nisio M, van Sluis GL, Bossuyt PM, Buller HR, Porreca E, Rutjes AW. Accuracy of diagnostic tests for clinically suspected upper extremity deep vein thrombosis: a systematic review. <i>J Thromb Haemost.</i> 2010;8:684-692. |
|                                                  | What are the consequences of using low pretest with a negative CUS plus Doppler to exclude upper extremity DVT?                                 | N/A                            | N/A                | Patients with suspected upper extremity DVT | N/A                          | N/A    | No studies using a combination of PTP and US | Di Nisio M, van Sluis GL, Bossuyt PM, Buller HR, Porreca E, Rutjes AW. Accuracy of diagnostic tests for clinically suspected upper extremity deep vein thrombosis: a systematic review. <i>J Thromb Haemost.</i> 2010;8:684-692. |
|                                                  | What are the consequences of using serial CUS to exclude DVT in patients with a low, moderate, or high PTP of upper extremity DVT?              | N/A                            | N/A                | Patients with suspected upper extremity DVT | N/A                          | N/A    | No studies using a combination of PTP and US | Di Nisio M, van Sluis GL, Bossuyt PM, Buller HR, Porreca E, Rutjes AW. Accuracy of diagnostic tests for clinically suspected upper extremity deep vein thrombosis: a systematic review. <i>J Thromb Haemost.</i> 2010;8:684-692. |
|                                                  | What are the consequences of using serial Doppler US to exclude DVT in patients with a low, moderate, or high PTP of upper extremity DVT?       | Meta-analysis                  | N/A                | Patients with suspected upper extremity DVT | N/A                          | N/A    | No studies using a combination of PTP and US | Di Nisio M, van Sluis GL, Bossuyt PM, Buller HR, Porreca E, Rutjes AW. Accuracy of diagnostic tests for clinically suspected upper extremity deep vein thrombosis: a systematic review. <i>J Thromb Haemost.</i> 2010;8:684-692. |
|                                                  | What are the consequences of using serial CUS plus Doppler to exclude DVT in patients with a low, moderate, or high PTP of upper extremity DVT? | Meta-analysis                  | N/A                | Patients with suspected upper extremity DVT | N/A                          | N/A    | No studies using a combination of PTP and US | Di Nisio M, van Sluis GL, Bossuyt PM, Buller HR, Porreca E, Rutjes AW. Accuracy of diagnostic tests for clinically suspected upper extremity deep vein thrombosis: a systematic review. <i>J Thromb Haemost.</i> 2010;8:684-692. |

(Continued)

**Table S58—Continued**

| Question from Structured Clinical Question Table | Clinical Situation/ Question                                                                                                                                      | Meta-analysis vs Primary Study | Reference Standard | Patient Population                          | Outcome Measure <sup>a</sup> | Result | Comments                                          | Reference                                                                                                                                                                                                                        |
|--------------------------------------------------|-------------------------------------------------------------------------------------------------------------------------------------------------------------------|--------------------------------|--------------------|---------------------------------------------|------------------------------|--------|---------------------------------------------------|----------------------------------------------------------------------------------------------------------------------------------------------------------------------------------------------------------------------------------|
|                                                  | What are the consequences of using serial CUS to exclude upper extremity DVT in patients with a positive DD and either a low, moderate, or high PTP?              | Meta-analysis                  | N/A                | Patients with suspected upper extremity DVT | N/A                          | N/A    | No studies using a combination of DD, PTP and US  | Di Nisio M, van Sluis GL, Bossuyt PM, Buller HR, Porreca E, Rutjes AW. Accuracy of diagnostic tests for clinically suspected upper extremity deep vein thrombosis: a systematic review. <i>J Thromb Haemost.</i> 2010;8:684-692. |
|                                                  | What are the consequences of using serial Doppler US to exclude upper extremity DVT in patients with a positive DD and either a low, moderate, or high PTP?       | Meta-analysis                  | N/A                | Patients with suspected upper extremity DVT | N/A                          | N/A    | No studies using a combination of DD, PTP, and US | Di Nisio M, van Sluis GL, Bossuyt PM, Buller HR, Porreca E, Rutjes AW. Accuracy of diagnostic tests for clinically suspected upper extremity deep vein thrombosis: a systematic review. <i>J Thromb Haemost.</i> 2010;8:684-692. |
|                                                  | What are the consequences of using serial CUS plus Doppler to exclude upper extremity DVT in patients with a positive DD and either a low, moderate, or high PTP? | Meta-analysis                  | N/A                | Patients with suspected upper extremity DVT | N/A                          | N/A    | No studies using a combination of DD, PTP, and US | Di Nisio M, van Sluis GL, Bossuyt PM, Buller HR, Porreca E, Rutjes AW. Accuracy of diagnostic tests for clinically suspected upper extremity deep vein thrombosis: a systematic review. <i>J Thromb Haemost.</i> 2010;8:684-692. |

(Continued)

**Table S58—Continued**

| Question from Structured Clinical Question Table | Clinical Situation/ Question                                                                                                                                                                       | Meta-analysis vs Primary Study | Reference Standard | Patient Population                          | Outcome Measure <sup>a</sup> | Result | Comments                                          | Reference                                                                                                                                                                                                                        |
|--------------------------------------------------|----------------------------------------------------------------------------------------------------------------------------------------------------------------------------------------------------|--------------------------------|--------------------|---------------------------------------------|------------------------------|--------|---------------------------------------------------|----------------------------------------------------------------------------------------------------------------------------------------------------------------------------------------------------------------------------------|
|                                                  | What are the consequences of using a negative DD to obviate the need for serial testing in patients with suspected upper extremity DVT and a negative CUS and either a low, moderate, or high PTP? | Meta-analysis                  | N/A                | Patients with suspected upper extremity DVT | N/A                          | N/A    | No studies using a combination of DD, PTP, and US | Di Nisio M, van Sluis GL, Bossuyt PM, Buller HR, Porreca E, Rutjes AW. Accuracy of diagnostic tests for clinically suspected upper extremity deep vein thrombosis: a systematic review. <i>J Thromb Haemost.</i> 2010;8:684-692. |
|                                                  | What are the consequences of using a negative DD to obviate the need for serial testing in patients with suspected upper extremity DVT and either a low, moderate, or high PTP?                    | Meta-analysis                  | N/A                | Patients with suspected upper extremity DVT | N/A                          | N/A    | No studies using a combination of DD, PTP, and US | Di Nisio M, van Sluis GL, Bossuyt PM, Buller HR, Porreca E, Rutjes AW. Accuracy of diagnostic tests for clinically suspected upper extremity deep vein thrombosis: a systematic review. <i>J Thromb Haemost.</i> 2010;8:684-692. |
|                                                  | What are the consequences of using a negative DD to obviate the need for serial testing in patients with suspected upper extremity DVT and either a low, moderate, or high PTP?                    | Meta-analysis                  | N/A                | Patients with suspected upper extremity DVT | N/A                          | N/A    | No studies using a combination of DD, PTP, and US | Di Nisio M, van Sluis GL, Bossuyt PM, Buller HR, Porreca E, Rutjes AW. Accuracy of diagnostic tests for clinically suspected upper extremity deep vein thrombosis: a systematic review. <i>J Thromb Haemost.</i> 2010;8:684-692. |

(Continued)

**Table S58—Continued**

| Question from Structured Clinical Question Table | Clinical Situation/ Question                                                                            | Meta-analysis vs Primary Study | Reference Standard | Patient Population                          | Outcome Measure <sup>a</sup> | Result                                                                                             | Comments                                                                                                         | Reference                                                                                                                                                                                                                         |
|--------------------------------------------------|---------------------------------------------------------------------------------------------------------|--------------------------------|--------------------|---------------------------------------------|------------------------------|----------------------------------------------------------------------------------------------------|------------------------------------------------------------------------------------------------------------------|-----------------------------------------------------------------------------------------------------------------------------------------------------------------------------------------------------------------------------------|
|                                                  | What are the consequences of using a sensitive DD as a stand-alone test to exclude upper extremity DVT? | Primary                        | Venography         | Patients with suspected upper extremity DVT | Sensitivity                  | Sensitivity 100% (78%-100%)                                                                        | N = 52 patients; 23 had cancer; Vidas DD. Mixed inpatient and outpatient population<br>Specificity, 14% (4%-29%) | Merrimod T, Pelluciotto S, Bounameaux H. Limited usefulness of D-dimer in suspected deep vein thrombosis of the upper extremities. <i>Blood Coagul Fibrinolysis</i> . 2006;17:225-227.                                            |
|                                                  | What are the consequences of using a SimpliRED DD as a stand-alone test to exclude upper extremity DVT? | Meta-analysis                  | N/A                | Patients with suspected upper extremity DVT | N/A                          | N/A                                                                                                | No studies using the SimpliRED DD alone                                                                          | Di Nisio M, van Sluis GL, Bossuyt PM, Buller HR, Porreca E, Rutjes AW. Accuracy of diagnostic tests for clinically suspected upper extremity deep vein thrombosis: a systematic review. <i>J Thromb Haemost</i> . 2010;8:684-692. |
|                                                  | What are the consequences of using MRI to diagnose upper extremity DVT?                                 | Primary                        | Venography         | Patients with suspected upper extremity DVT | Specificity                  | Time of flight MRI; specificity, 89% (52%-100%)<br>Gadolinium-enhanced; specificity, 80% (44%-97%) | N = 31; 10 patients unable to undergo MRI. Mixed inpatient and outpatient population                             | Baarslag H-J, van Beek EJR, Reekers JA. Magnetic resonance venography in consecutive patients with suspected deep vein thrombosis of the upper extremity: initial experience. <i>Acta Radiol</i> . 2004;45:38-43.                 |

(Continued)



**Table S58—Continued**

| Question from Structured Clinical Question Table | Clinical Situation/ Question                                                         | Meta-analysis vs Primary Study | Reference Standard | Patient Population                          | Outcome Measure <sup>a</sup> | Result                                                                                            | Comments                                                                                                                                                                                                                                                | Reference                                                                                                                                                                                                        |
|--------------------------------------------------|--------------------------------------------------------------------------------------|--------------------------------|--------------------|---------------------------------------------|------------------------------|---------------------------------------------------------------------------------------------------|---------------------------------------------------------------------------------------------------------------------------------------------------------------------------------------------------------------------------------------------------------|------------------------------------------------------------------------------------------------------------------------------------------------------------------------------------------------------------------|
|                                                  | What are the consequences of using MRI to exclude upper extremity DVT?               | Primary                        | Venography         | Patients with suspected upper extremity DVT | Sensitivity                  | Time of flight MRI; sensitivity, 71% (26%-96%)<br>Gadolinium-enhanced; sensitivity, 50% (12%-88%) | N = 31; 10 patients unable to undergo MRI. Mixed inpatient and outpatient population                                                                                                                                                                    | Baarslag H-J, van Beek EJR, Reekers JA. Magnetic resonance venography in consecutive patients with suspected deep vein thrombosis of the upper extremity: initial experience. <i>Acta Radiol.</i> 2004;45:38-43. |
|                                                  | What are the consequences of using a clinical score to diagnose upper extremity DVT? | Primary                        | Duplex US          | Patients with suspected upper extremity DVT | Specificity                  | Specificity, 64% (57%-72%)                                                                        | N = 214; clinical score based on presence of localized pain, unilateral pitting edema, presence of central line or pacemaker, and presence of an alternative diagnosis. Mixed inpatient and outpatient population. Duplex US used as reference standard | Constans J, Salmi L-R, Sevestre-Pietri M-A, et al. A clinical prediction score for upper extremity deep venous thrombosis. <i>Thromb Haemost.</i> 2008;99:202-207.                                               |
|                                                  | What are the consequences of using a clinical score to exclude upper extremity DVT?  | Primary                        | Duplex US          | Patients with suspected upper extremity DVT | Sensitivity                  | Sensitivity, 78% (68%-88%)                                                                        | N = 214; Clinical score based on presence of localized pain, unilateral pitting edema, presence of central line or pacemaker, and presence of an alternative diagnosis. Mixed inpatient and outpatient population. Duplex US used as reference standard | Constans J, Salmi L-R, Sevestre-Pietri M-A, et al. A clinical prediction score for upper extremity deep venous thrombosis. <i>Thromb Haemost.</i> 2008;99:202-207.                                               |

See Table S1, S3, and S7 legends for expansion of abbreviations.

**Table S59—[Sections 6.1, 6.2] Evidence Profile: Should a Clinical Model Be Used to Evaluate Patients With Suspected Upper Extremity DVT?**

| Outcome                                                       | No. of Studies   | Study Design    | Limitations <sup>a</sup> | Inconsistency <sup>b</sup> | Indirectness <sup>c</sup> | Imprecision <sup>d</sup> | Final Quality | Effect/1,000 <sup>e</sup>                      |
|---------------------------------------------------------------|------------------|-----------------|--------------------------|----------------------------|---------------------------|--------------------------|---------------|------------------------------------------------|
| True positive (patients with DVT)                             | 1 (214 Patients) | Accuracy cohort | Very serious             | N/A                        | Serious                   | Serious                  | Low           | Prev 53%: 413<br>Prev 17%: 133<br>Prev 5%: 39  |
| True negative (patients without DVT)                          |                  |                 |                          |                            |                           |                          |               | Prev 53%: 301<br>Prev 17%: 531<br>Prev 5%: 608 |
| False negative (patients incorrectly classified DVT negative) |                  |                 |                          |                            |                           |                          |               | Prev 53%: 117<br>Prev 17%: 37<br>Prev 5%: 11   |
| False positive (patients incorrectly classified DVT positive) |                  |                 |                          |                            |                           |                          |               | Prev 53%: 169<br>Prev 17%: 299<br>Prev 5%: 342 |

Bibliography: Constans J, Salmi L-R, Sevestre-Pietri M-A, et al. A clinical prediction score for upper extremity deep venous thrombosis. *Thromb Haemost.* 2008;99:202-207. Setting: Suspected upper extremity DVT. Reference test: single US.

<sup>a</sup>Not clearly a representative sample, accepted reference standard not used, reference standard results not blinded, no data on withdrawals

<sup>b</sup>Single study.

<sup>c</sup>Accuracy study.

<sup>d</sup>Wide 95% CIs.

<sup>e</sup>Based on a specificity of 64% (95% CI, 57%-72%) and a sensitivity of 78% (95% CI, 68%-88%). Prevalences taken from Wells et al.<sup>30</sup>

**Table S60—[Sections 6.1, 6.2] Evidence Profile: Should a Highly Sensitive DD Be Used to Evaluate Suspected Upper Extremity DVT?**

| Outcome                                                       | No. of Studies  | Study Design    | Limitations <sup>a</sup> | Inconsistency <sup>b</sup> | Indirectness <sup>c</sup> | Imprecision <sup>d</sup> | Final Quality | Effect/1,000 <sup>e</sup>                      |
|---------------------------------------------------------------|-----------------|-----------------|--------------------------|----------------------------|---------------------------|--------------------------|---------------|------------------------------------------------|
| True positive (patients with DVT)                             | 1 (52 patients) | Accuracy cohort | Very serious             | N/A                        | Serious                   | Very serious             | Low           | Prev 53%: 530<br>Prev 17%: 170<br>Prev 5%: 50  |
| True negative (patients without DVT)                          |                 |                 |                          |                            |                           |                          |               | Prev 53%: 66<br>Prev 17%: 116<br>Prev 5%: 133  |
| False negative (patients incorrectly classified DVT negative) |                 |                 |                          |                            |                           |                          |               | Prev 53%: 0<br>Prev 17%: 0<br>Prev 5%: 0       |
| False positive (patients incorrectly classified DVT positive) |                 |                 |                          |                            |                           |                          |               | Prev 53%: 404<br>Prev 17%: 714<br>Prev 5%: 817 |

Bibliography: Merminod T, Pellicciotta S, Bounameaux H. Limited usefulness of d-dimer in suspected deep vein thrombosis of the upper extremities. *Blood Coagul Fibrinolysis*. 2006;17:225-227. Setting: Suspected upper extremity DVT. Reference test: single US. See Table 1 legend for expansion of abbreviation.

<sup>a</sup>Differential verification, accepted reference standard not used, no data on withdrawals

<sup>b</sup>Single study

<sup>c</sup>Accuracy study

<sup>d</sup>Wide 95% CIs.

<sup>e</sup>Based on a specificity of 14% (95% CI, 4%-29%) and a sensitivity of 100% (95% CI, 78%-100%). Prevalences taken from Wells et al.<sup>30</sup>

**Table S61—[Sections 6.1, 6.2] Evidence Profile: Should CUS Be Used to Evaluate Patients With Suspected Upper Extremity DVT?**

| Outcome                                                       | No. of Studies  | Study Design    | Limitations <sup>a</sup> | Inconsistency <sup>b</sup> | Indirectness <sup>c</sup> | Imprecision <sup>d</sup> | Final Quality | Effect/1,000 <sup>e</sup>                      |
|---------------------------------------------------------------|-----------------|-----------------|--------------------------|----------------------------|---------------------------|--------------------------|---------------|------------------------------------------------|
| True positive (patients with DVT)                             | 2 (65 Patients) | Accuracy cohort | Very serious             | None                       | Serious                   | Serious                  | Low           | Prev 53%: 514<br>Prev 17%: 165<br>Prev 5%: 49  |
| True negative (patients without DVT)                          |                 |                 |                          |                            |                           |                          |               | Prev 53%: 442<br>Prev 17%: 780<br>Prev 5%: 893 |
| False negative (patients incorrectly classified DVT negative) |                 |                 |                          |                            |                           |                          |               | Prev 53%: 16<br>Prev 17%: 5<br>Prev 5%: 1      |
| False positive (patients incorrectly classified DVT positive) |                 |                 |                          |                            |                           |                          |               | Prev 53%: 28<br>Prev 17%: 50<br>Prev 5%: 57    |

Bibliography: Prandoni P, Polistena P, Bernardi E, et al. Upper-extremity deep vein thrombosis. Risk factors, diagnosis, and complications. *Arch Intern Med*. 1997;157:57-62. Sullivan ED, Peter DJ, Cranley JJ. Real-time B-mode venous ultrasound. *J Vasc Surg*. 1984;1:465-471. Setting: suspected upper extremity DVT. Reference test: venography. See Table S7 legend for expansion of abbreviation.

<sup>a</sup> In one study, CUS results unverified against reference standard in 26 of 33 patients; unclear if representative sample; unclear if reference standard results blinded, withdrawals not reported.

<sup>b</sup> Two studies

<sup>c</sup> No management studies.

<sup>d</sup> Wide 95% CIs.

Based on a specificity of 94% (95% CI, 80%-99%) and a sensitivity of 97% (95% CI, 90%-100%). Prevalences taken from Wells et al.<sup>30</sup>

**Table S62—[Sections 6.1, 6.2] Evidence Profile: Should Doppler US Be Used to Evaluate Patients With Suspected Upper Extremity DVT?**

| Outcome                                                       | No. of Studies   | Study Design    | Limitations <sup>a</sup> | Inconsistency <sup>b</sup> | Indirectness <sup>c</sup> | Imprecision <sup>d</sup>                              | Final Quality | Effect/1,000 <sup>e</sup>                      |
|---------------------------------------------------------------|------------------|-----------------|--------------------------|----------------------------|---------------------------|-------------------------------------------------------|---------------|------------------------------------------------|
| True positive (patients with DVT)                             | 3 (101 Patients) | Accuracy cohort | Very serious             | None                       | Serious                   | Serious for specificity, very serious for sensitivity | Low           | Prev 53%: 445<br>Prev 17%: 143<br>Prev 5%: 42  |
| True negative (patients without DVT)                          |                  |                 |                          |                            |                           |                                                       |               | Prev 53%: 451<br>Prev 17%: 797<br>Prev 5%: 912 |
| False negative (patients incorrectly classified DVT negative) |                  |                 |                          |                            |                           |                                                       |               | Prev 53%: 85<br>Prev 17%: 27<br>Prev 5%: 8     |
| False positive (patients incorrectly classified DVT positive) |                  |                 |                          |                            |                           |                                                       |               | Prev 53%: 19<br>Prev 17%: 33<br>Prev 5%: 38    |

Bibliography: Di Nisio M, van Sluis GL, Bossuyt PM, Buller HR, Porreca E, Rutjes AW. Accuracy of diagnostic tests for clinically suspected upper extremity deep vein thrombosis: a systematic review. *J Thromb Haemost*. 2010;8:684-692. Setting: suspected upper extremity DVT. Reference test: venography.

<sup>a</sup>In one study, three of 21 Doppler US results unverified against reference standard and four of 18 patients verified against CT scan, rather than venography; in another study, CUS also performed with potential for bias.

<sup>b</sup>Three studies.

<sup>c</sup>No management studies.

<sup>d</sup>Wide 95% CIs.

<sup>e</sup>Based on a specificity of 96% (95% CI, 86%-100%) and a sensitivity of 84% (95% CI, 72%-87%). Prevalences taken from Wells et al.<sup>10</sup>

**Table S63—[Sections 6.1, 6.2] Evidence Profile Should Doppler US Plus CUS Be Used to Evaluate Patients With Suspected Upper Extremity DVT?**

| Outcome                                                       | No. of Studies   | Study Design    | Limitations <sup>a</sup> | Inconsistency <sup>b</sup> | Indirectness <sup>c</sup> | Imprecision <sup>d</sup> | Final Quality | Effect/1,000 <sup>e</sup>                      |
|---------------------------------------------------------------|------------------|-----------------|--------------------------|----------------------------|---------------------------|--------------------------|---------------|------------------------------------------------|
| True positive (patients with DVT)                             | 6 (320 Patients) | Accuracy cohort | Very serious             | None                       | Serious                   | Serious                  | Low           | Prev 53%: 482<br>Prev 17%: 155<br>Prev 5%: 45  |
| True negative (patients without DVT)                          |                  |                 |                          |                            |                           |                          |               | Prev 53%: 437<br>Prev 17%: 772<br>Prev 5%: 883 |
| False negative (patients incorrectly classified DVT negative) |                  |                 |                          |                            |                           |                          |               | Prev 53%: 48<br>Prev 17%: 15<br>Prev 5%: 5     |
| False positive (patients incorrectly classified DVT positive) |                  |                 |                          |                            |                           |                          |               | Prev 53%: 33<br>Prev 17%: 58<br>Prev 5%: 67    |

Bibliography: Di Nisio M, van Sluis GL, Bossuyt PM, Buller HR, Porreca E, Ruijs AW. Accuracy of diagnostic tests for clinically suspected upper extremity deep vein thrombosis: a systematic review. *J Thromb Haemost*. 2010;8:684-692. Setting: suspected upper extremity DVT. Reference test: venography. See Table S1 and S7 legends for expansion of abbreviations.

<sup>a</sup>In one study, 19 of 42 duplex US results unverified against reference standard; in another nine of 130 results unverified against reference standard and 22 of 121 duplex results verified against venography with remainder against CT scan, MRI, and clinical follow-up; four of six studies unclear if representative patient spectrum; two of six studies unclear if blinding of reference standard and index test results.

<sup>b</sup>Six studies

<sup>c</sup>No management studies.

<sup>d</sup>Wide 95% CIs.

<sup>e</sup>Based on a specificity of 93% (95% CI, 80%-100%) and a sensitivity of 91% (95% CI, 85%-97%). Prevalences taken from Wells et al.<sup>30</sup>

**Table S64—[Sections 6.1 and 6.2] Evidence Profile: Should MRI (Time of Flight) Be Used to Evaluate Patients With Suspected Upper Extremity DVT?**

| Outcome                                                       | No. of Studies  | Study Design    | Limitations <sup>a</sup> | Inconsistency <sup>b</sup> | Indirectness <sup>c</sup> | Imprecision <sup>d</sup> | Final Quality | Effect/1,000 <sup>e</sup>                      |
|---------------------------------------------------------------|-----------------|-----------------|--------------------------|----------------------------|---------------------------|--------------------------|---------------|------------------------------------------------|
| True positive (patients with DVT)                             | 1 (31 Patients) | Accuracy cohort | Very serious             | N/A                        | Serious                   | Very serious             | Low           | Prev 53%: 376<br>Prev 17%: 121<br>Prev 5%: 35  |
| True negative (patients without DVT)                          |                 |                 |                          |                            |                           |                          |               | Prev 53%: 418<br>Prev 17%: 739<br>Prev 5%: 845 |
| False negative (patients incorrectly classified DVT negative) |                 |                 |                          |                            |                           |                          |               | Prev 53%: 154<br>Prev 17%: 49<br>Prev 5%: 15   |
| False positive (patients incorrectly classified DVT positive) |                 |                 |                          |                            |                           |                          |               | Prev 53%: 52<br>Prev 17%: 91<br>Prev 5%: 105   |

Bibliography: Baarslag HJ, van Beek EJR, Reekers JA. Magnetic resonance venography in consecutive patients with suspected deep vein thrombosis of the upper extremity: initial experience. *Acta Radiol.* 2004;45:38-43. Setting: suspected upper extremity DVT. Reference test: venography.

<sup>a</sup> Twenty-three of initial 44 patients were lost and not available for follow-up.

<sup>b</sup> Single study.

<sup>c</sup> No management studies.

<sup>d</sup> Wide 95% CIs.

<sup>e</sup> Based on a specificity of 89% (95% CI, 52%-100%) and a sensitivity of 71% (95% CI, 26%-96%). Prevalences taken from Wells et al.<sup>10</sup>

**Table S65—[Sections 6.1 and 6.2] Evidence Profile: Should MRI (Gadolinium) Be Used to Evaluate Patients With Suspected Upper Extremity DVT?**

| Outcome                                                       | No. of Studies  | Study Design    | Limitations <sup>a</sup> | Inconsistency <sup>b</sup> | Indirectness <sup>c</sup> | Imprecision <sup>d</sup> | Final Quality | Effect/1,000 <sup>e</sup>                      |
|---------------------------------------------------------------|-----------------|-----------------|--------------------------|----------------------------|---------------------------|--------------------------|---------------|------------------------------------------------|
| True positive (patients with DVT)                             | 1 (31 Patients) | Accuracy cohort | Very serious             | N/A                        | Serious                   | Very serious             | Low           | Prev 53%: 265<br>Prev 17%: 85<br>Prev 5%: 25   |
| True negative (patients without DVT)                          |                 |                 |                          |                            |                           |                          |               | Prev 53%: 376<br>Prev 17%: 664<br>Prev 5%: 760 |
| False negative (patients incorrectly classified DVT negative) |                 |                 |                          |                            |                           |                          |               | Prev 53%: 265<br>Prev 17%: 85<br>Prev 5%: 25   |
| False positive (patients incorrectly classified DVT positive) |                 |                 |                          |                            |                           |                          |               | Prev 53%: 94<br>Prev 17%: 166<br>Prev 5%: 190  |

Bibliography: Baarslag HJ, van Beek EJR, Reekers JA. Magnetic resonance venography in consecutive patients with suspected deep vein thrombosis of the upper extremity: initial experience. *Acta Radiol.* 2004;45:38-43. Setting: suspected upper extremity DVT. Reference test: venography.

<sup>a</sup>Twenty-three of initial 44 patients were lost and not available for follow-up.

<sup>b</sup>Single study.

<sup>c</sup>No management studies.

<sup>d</sup>Wide 95% CIs.

<sup>e</sup>Based on a specificity of 80% (95% CI, 44%-97%) and a sensitivity of 50% (95% CI, 12%-88%). Prevalences taken from Wells et al.<sup>30</sup>



## REFERENCES

- Gibson NS, Schellong SM, Kheir DY, et al. Safety and sensitivity of two ultrasound strategies in patients with clinically suspected deep venous thrombosis: a prospective management study. *J Thromb Haemost.* 2009;7(12):2035-2041.
- Bernardi E, Camporese G, Büller HR, et al; Erasmus Study Group. Serial 2-point ultrasonography plus D-dimer vs whole-leg color-coded Doppler ultrasonography for diagnosing suspected symptomatic deep vein thrombosis: a randomized controlled trial. *JAMA.* 2008;300(14):1653-1659.
- Johnson SA, Stevens SM, Woller SC, et al. Risk of deep vein thrombosis following a single negative whole-leg compression ultrasound: a systematic review and meta-analysis. *JAMA.* 2010;303(5):438-445.
- Elias A, Mallard L, Elias M, et al. A single complete ultrasound investigation of the venous network for the diagnostic management of patients with a clinically suspected first episode of deep venous thrombosis of the lower limbs. *Thromb Haemost.* 2003;89(2):221-227.
- Schellong SM, Schwarz T, Halbritter K, et al. Complete compression ultrasonography of the leg veins as a single test for the diagnosis of deep vein thrombosis. *Thromb Haemost.* 2003;89(2):228-234.
- Sevestre MA, Labarère J, Casez P, et al. Accuracy of complete compression ultrasound in ruling out suspected deep venous thrombosis in the ambulatory setting. A prospective cohort study. *Thromb Haemost.* 2009;102(1):166-172.
- Sevestre MA, Labarère J, Casez P, et al. Outcomes for inpatients with normal findings on whole-leg ultrasonography: a prospective study. *Am J Med.* 2010;123(2):158-165.
- Stevens SM, Elliott CG, Chan KJ, Egger MJ, Ahmed KM. Withholding anticoagulation after a negative result on duplex ultrasonography for suspected symptomatic deep venous thrombosis. *Ann Intern Med.* 2004;140(12):985-991.
- Subramaniam RM, Heath R, Chou T, Cox K, Davis G, Swarbrick M. Deep venous thrombosis: withholding anticoagulation therapy after negative complete lower limb US findings. *Radiology.* 2005;237(1):348-352.
- Anderson DR, Wells PS, Stiell I, et al. Thrombosis in the emergency department: use of a clinical diagnosis model to safely avoid the need for urgent radiological investigation. *Arch Intern Med.* 1999;159(5):477-482.
- Wells PS, Anderson DR, Bormanis J, et al. Application of a diagnostic clinical model for the management of hospitalized patients with suspected deep-vein thrombosis. *Thromb Haemost.* 1999;81(4):493-497.
- Wells PS, Anderson DR, Bormanis J, et al. Value of assessment of PTP of deep-vein thrombosis in clinical management. *Lancet.* 1997;350(9094):1795-1798.
- Kraaijenhagen RA, Piovella F, Bernardi E, et al. Simplification of the diagnostic management of suspected deep vein thrombosis. *Arch Intern Med.* 2002;162(8):907-911.
- Walsh K, Kelaher N, Long K, Cervi P. An algorithm for the investigation and management of patients with suspected deep venous thrombosis at a district general hospital. *Postgrad Med J.* 2002;78(926):742-745.
- Bates SM, Kearon C, Crowther M, et al. A diagnostic strategy involving a quantitative latex D-dimer assay reliably excludes deep venous thrombosis. *Ann Intern Med.* 2003;138(10):787-794.
- Schutgens REG, Ackermans P, Haas FJLM, et al. Combination of a normal D-dimer concentration and a non-high pretest clinical probability score is a safe strategy to exclude deep venous thrombosis. *Circulation.* 2003;107(4):593-597.
- Anderson DR, Kovacs MJ, Kovacs G, et al. Combined use of clinical assessment and d-dimer to improve the management of patients presenting to the emergency department with suspected deep vein thrombosis (the EDITED Study). *J Thromb Haemost.* 2003;1(4):645-651.
- Janes S, Ashford N. Use of a simplified clinical scoring system and D-dimer testing can reduce the requirement for radiology in the exclusion of deep vein thrombosis by over 20%. *Br J Haematol.* 2001;112(4):1079-1082.
- Perrier A, Desmarais S, Miron MJ, et al. Non-invasive diagnosis of venous thromboembolism in outpatients. *Lancet.* 1999;353(9148):190-195.
- Tick LW, Ton E, van Voorthuizen T, et al. Practical diagnostic management of patients with clinically suspected deep vein thrombosis by clinical probability test, compression ultrasonography, and D-dimer test. *Am J Med.* 2002;113(8):630-635.
- Wells PS, Anderson DR, Rodger M, et al. Evaluation of D-dimer in the diagnosis of suspected deep-vein thrombosis. *N Engl J Med.* 2003;349(13):1227-1235.
- Hull R, Hirsh J, Sackett DL, et al. Clinical validity of a negative venogram in patients with clinically suspected venous thrombosis. *Circulation.* 1981;64(3):622-625.
- Goodacre S, Sampson F, Thomas S, van Beek E, Sutton A. Systematic review and meta-analysis of the diagnostic accuracy of ultrasonography for deep vein thrombosis. *BMC Med Imaging.* 2005;5:6.
- Geers GJ, Janssen KJ, Oudega R, et al. Excluding venous thromboembolism using point of care D-dimer tests in outpatients: a diagnostic meta-analysis. *BMJ.* 2009;339:b2990.
- Goodacre S, Sampson FC, Sutton AJ, Mason S, Morris F. Variation in the diagnostic performance of D-dimer for suspected deep vein thrombosis. *QJM.* 2005;98(7):513-527.
- Di Nisio M, Squizzato A, Rutjes AWS, Büller HR, Zwiderman AH, Bossuyt PM. Diagnostic accuracy of D-dimer test for exclusion of venous thromboembolism: a systematic review. *J Thromb Haemost.* 2007;5(2):296-304.
- Stein PD, Hull RD, Patel KC, et al. D-dimer for the exclusion of acute venous thrombosis and pulmonary embolism: a systematic review. *Ann Intern Med.* 2004;140(8):589-602.
- Subramaniam RM, Snyder B, Heath R, Tawse F, Sleigh J. Diagnosis of lower limb deep venous thrombosis in emergency department patients: performance of Hamilton and modified Wells scores. *Ann Emerg Med.* 2006;48(6):678-685.
- Fancher TL, White RH, Kravitz RL. Combined use of rapid D-dimer testing and estimation of clinical probability in the diagnosis of deep vein thrombosis: systematic review. *BMJ.* 2004;329(7470):821.
- Wells PS, Owen C, Doucette S, Fergusson D, Tran H. Does this patient have deep vein thrombosis? *JAMA.* 2006;295(2):199-207.
- Righini M, Perrier A, De Moerloose P, et al. D-Dimer for venous thromboembolism diagnosis: 20 years later. *J Thromb Haemost.* 2008;6:1059-1071.
- Büller HR, Ten Cate-Hoek AJ, Hoes AW, et al; AMUSE (Amsterdam Maastricht Utrecht Study on thromboEmbolism) Investigators. Safely ruling out deep venous thrombosis in primary care. *Ann Intern Med.* 2009;150(4):229-235.
- Bernardi E, Prandoni P, Lensing AW, et al; The Multicentre Italian D-dimer Ultrasound Study Investigators Group. D-dimer testing as an adjunct to ultrasonography in patients with clinically suspected deep vein thrombosis: prospective cohort study. *BMJ.* 1998;317(7165):1037-1040.
- Cogo A, Lensing AW, Koopman MM, et al. Compression ultrasonography for diagnostic management of patients with clinically suspected deep vein thrombosis: prospective cohort study. *BMJ.* 1998;316(7124):17-20.

35. Aguilar C, Martinez A, Martinez A, Del Rio C, Vazquez M, Rodriguez FJ. Diagnostic value of d-dimer in patients with a moderate PTP of deep venous thrombosis. *Br J Haematol*. 2002;118(1):275-277.
36. Ruiz-Giménez N, Friera A, Artieda P, et al. Rapid D-dimer test combined a clinical model for deep vein thrombosis. Validation with ultrasonography and clinical follow-up in 383 patients. *Thromb Haemost*. 2004;91(6):1237-1246.
37. Oudega R, Hoes AW, Moons KG. The Wells rule does not adequately rule out deep venous thrombosis in primary care patients. *Ann Intern Med*. 2005;143(2):100-107.
38. Kearon C, Ginsberg JS, Douketis J, et al. Management of suspected deep venous thrombosis in outpatients by using clinical assessment and D-dimer testing. *Ann Intern Med*. 2001;135(2):108-111.
39. Kearon C, Ginsberg JS, Douketis J, et al. A randomized trial of diagnostic strategies after normal proximal vein ultrasonography for suspected deep venous thrombosis: D-dimer testing compared with repeated ultrasonography. *Ann Intern Med*. 2005;142(7):490-496.
40. Jaeschke R, Gajewski P, Bates SM, et al. 2009 evidence-based clinical practice guidelines for diagnosing a first episode of lower extremities deep vein thrombosis in ambulatory outpatients. *Pol Arch Med Wewn*. 2009;119(9):541-549.
41. Goodacre S, Sampson F, Stevenson M, et al. Measurement of the clinical and cost-effectiveness of non-invasive diagnostic testing strategies for deep vein thrombosis. *Health Technol Assess*. 2006;10(15):1-168.
42. Kearon C, Julian JA, Newman TE, Ginsberg JS. Noninvasive diagnosis of deep venous thrombosis. McMaster Diagnostic Imaging Practice Guidelines Initiative. *Ann Intern Med*. 1998;128(8):663-677.
43. Atri M, Herba MJ, Reinhold C, et al. Accuracy of sonography in the evaluation of calf deep vein thrombosis in both postoperative surveillance and symptomatic patients. *AJR Am J Roentgenol*. 1996;166(6):1361-1367.
44. Baxter GM, McKechnie S, Duffy P. Colour Doppler ultrasound in deep venous thrombosis: a comparison with venography. *Clin Radiol*. 1990;42(1):32-36.
45. Baxter GM, Duffy P, Partridge E. Colour flow imaging of calf vein thrombosis. *Clin Radiol*. 1992;46(3):198-201.
46. Belcaro GV, Laurora G, Cesarone MR, Errichi BM. Colour duplex scanning and phlebography in deep vein thrombosis. *Panminerva Med*. 1992;34(1):1-3.
47. Bendick PJ, Glover JL, Holden RW, Dillely RS. Pitfalls of the Doppler examination for venous thrombosis. *Am Surg*. 1983;49(6):320-323.
48. Biondetti PR, Vigo M, Tomasella G, Prandoni P. [Diagnosis of deep venous thrombosis of the legs: accuracy of ultrasonography using vein compression]. *Radiol Med (Torino)*. 1990;80(4):463-468.
49. Bradley MJ, Spencer PA, Alexander L, Milner GR. Colour flow mapping in the diagnosis of the calf deep vein thrombosis. *Clin Radiol*. 1993;47(6):399-402.
50. Burke P, Fitzgerald P, Kee S, et al. Duplex imaging for deep vein thrombosis: is it sufficient? *J Ir Coll Physicians Surg*. 1994;50:105-107.
51. Cogo A, Lensing AW, Prandoni P, Büller HR, Girolami A, ten Cate JW. Comparison of real-time B-mode ultrasonography and Doppler ultrasound with contrast venography in the diagnosis of venous thrombosis in symptomatic outpatients. *Thromb Haemost*. 1993;70(3):404-407.
52. de Laveaucoupet J, Morel MP, Philippoteau C, Simoneau G, Musset D. [Diagnostic value of the combination of echography-plethysmography in deep venous thromboses of the legs]. *Ann Radiol (Paris)*. 1989;32(6):447-454.
53. Elias A. Discrepancies between venography and real time B mode ultrasound imaging in the diagnosis of deep vein thrombosis [abstract]. *Thromb Haemost*. 1987;24.
54. Forbes K, Stevenson AJ. The use of power Doppler ultrasound in the diagnosis of isolated deep venous thrombosis of the calf. *Clin Radiol*. 1998;53(10):752-754.
55. Grobety M, Depairon M, Essinger A, Bizzini G, Luthy JC, Yersin B. [Value of Doppler ultrasonic studies in the diagnosis of deep venous thrombosis of the lower limbs]. *Schweiz Med Wochenschr*. 1996;126(27-28):1196-1201.
56. Guazzaloca G, Palareti G, Legnani C, et al. [Deep venous thrombosis. Evaluation of a non-invasive diagnostic procedure based on compression ultrasonography and measurement of D-dimer plasma levels]. *Minerva Cardioangiol*. 1997;45(6):259-266.
57. Habscheid W, Höhmann M, Wilhelm T, Epping J. Real-time ultrasound in the diagnosis of acute deep venous thrombosis of the lower extremity. *Angiology*. 1990;41(8):599-608.
58. Kalodiki E, Calahoras L, Nicolaides AN. Make it easy: examination of the duplex system. *Phlebology*. 1993;7:17-21.
59. Labropoulos N, Leon M, Kalodiki E, al Kutoubi A, Chan P, Nicolaides AN. Colour flow duplex scanning in suspected acute deep vein thrombosis: experience with routine use. *Eur J Vasc Endovasc Surg*. 1995;9(1):49-52.
60. Lensing AW, Prandoni P, Brandjes D, et al. Detection of deep-vein thrombosis by real-time B-mode ultrasonography. *N Engl J Med*. 1989;320(6):342-345.
61. Leven H, Hassan HA. Ultrasonic diagnosis of iliofemoral venous thrombosis: merits and disadvantages. *Phlebology*. 1990;5:107-112.
62. Lindqvist R. Ultrasound as a complementary diagnostic method in deep vein thrombosis of the leg. *Acta Med Scand*. 1977;201(5):435-438.
63. Mattos MA, Londrey GL, Leutz DW, et al. Color-flow duplex scanning for the surveillance and diagnosis of acute deep venous thrombosis. *J Vasc Surg*. 1992;15(2):366-375. discussion 375-366.
64. McCandless ME, Young JR, Swift CL. Noninvasive diagnosis of clinically suspected deep venous thrombosis. *Cleve Clin Q*. 1985;52(4):555-560.
65. Miller N, Satin R, Tousignant L, Sheiner NM. A prospective study comparing duplex scan and venography for diagnosis of lower-extremity deep vein thrombosis. *Cardiovasc Surg*. 1996;4(4):505-508.
66. Mitchell DC, Grasty MS, Stebbings WS, et al. Comparison of duplex ultrasonography and venography in the diagnosis of deep venous thrombosis. *Br J Surg*. 1991;78(5):611-613.
67. Monreal M, Montserrat E, Salvador R, et al. Real-time ultrasound for diagnosis of symptomatic venous thrombosis and for screening of patients at risk: correlation with ascending conventional venography. *Angiology*. 1989;40(6):527-533.
68. Puls R, Hosten N, Böck JS, et al. Signal-enhanced color Doppler sonography of deep venous thrombosis in the lower limbs and pelvis. *J Ultrasound Med*. 1999;18(3):185-190.
69. Quintavalla R, Larini P, Miselli A, et al. Duplex ultrasound diagnosis of symptomatic proximal deep vein thrombosis of lower limbs. *Eur J Radiol*. 1992;15(1):32-36.
70. Robertson PL, Goergen SK, Waugh JR, Fabiny RP. Colour-assisted compression ultrasound in the diagnosis of calf deep venous thrombosis. *Med J Aust*. 1995;163(10):515-518.
71. Robertson PL, Berlangieri SU, Goergen SK, et al. Comparison of ultrasound and blood pool scintigraphy in the diagnosis of lower limb deep venous thrombosis. *Clin Radiol*. 1994;49(6):382-390.
72. Rose SC, Zwiebel WJ, Nelson BD, et al. Symptomatic lower extremity deep venous thrombosis: accuracy, limitations,

- and role of color duplex flow imaging in diagnosis. *Radiology*. 1990;175(3):639-644.
73. Rosier H, Bellin MF, Bousquet JC, Radier C, Lang T, Grellet J. [Prospective study of echography versus phlebography in the detection of sural venous thrombosis]. *J Radiol*. 1992;73(11):579-584.
  74. Savy-Stortz C, Nové-Josserand R, Dubost A, Durand DV, Levrat R. [Venous ultrasonography coupled with continuous Doppler in the diagnosis of deep venous thrombosis of the lower limbs. Evaluation in symptomatic patients]. *Presse Med*. 1995;24(7):341-344.
  75. Simons GR, Skibo LK, Polak JF, Creager MA, Klapac-Fay JM, Goldhaber SZ. Utility of leg ultrasonography in suspected symptomatic isolated calf deep venous thrombosis. *Am J Med*. 1995;99(1):43-47.
  76. Size GP, Peterson DL, Laubach M, et al. Our experience with venous duplex imaging for the diagnosis of symptomatic deep vein thrombosis. *J Vasc Technol*. 1993;17(3/4):87-89.
  77. Yucel EK, Fisher JS, Eggin TK, Geller SC, Waltman AC. Isolated calf venous thrombosis: diagnosis with compression US. *Radiology*. 1991;179(2):443-446.
  78. Zhou MK, Pu LP, Wang ZG, Wang SH. Doppler ultrasonic diagnosis for deep venous thrombosis of lower limbs. *Chin Med J (Engl)*. 1990;103(4):271-273.
  79. Palareti G, Cosmi B, Lessiani G, et al. Evolution of untreated calf deep-vein thrombosis in high risk symptomatic outpatients: the blind, prospective CALTHRO study. *Thromb Haemost*. 2010;104(5):1063-1070.
  80. Thomas SM, Goodacre SW, Sampson FC, van Beek EJ. Diagnostic value of CT for deep vein thrombosis: results of a systematic review and meta-analysis. *Clin Radiol*. 2008; 63(3):299-304.
  81. Byun SS, Kim JH, Kim YJ, Jeon YS, Park CH, Kim WH. Evaluation of deep vein thrombosis with multidetector row CT after orthopedic arthroplasty: a prospective study for comparison with Doppler sonography. *Korean J Radiol*. 2008;9(1):59-66.
  82. Rhee KH, Iyer RS, Cha S, et al. Benefit of CT venography for the diagnosis of thromboembolic disease. *Clin Imaging*. 2007;31(4):253-258.
  83. Goodman LR, Stein PD, Matta F, et al. CT venography and compression sonography are diagnostically equivalent: data from PIOPED II. *AJR Am J Roentgenol*. 2007;189(5): 1071-1076.
  84. Garcia-Bolado A, Del Cura JL. CT venography vs ultrasound in the diagnosis of thromboembolic disease in patients with clinical suspicion of pulmonary embolism. *Emerg Radiol*. 2007;14(6):403-409.
  85. Kim T, Murakami T, Hori M, Kumano S, Sakon M, Nakamura H. Efficacy of multi-slice helical CT venography for the diagnosis of deep venous thrombosis: comparison with venous sonography. *Radiat Med*. 2004;22(2):77-81.
  86. Lim KE, Hsu WC, Hsu YY, Chu PH, Ng CJ. Deep venous thrombosis: comparison of indirect multidetector CT venography and sonography of lower extremities in 26 patients. *Clin Imaging*. 2004;28(6):439-444.
  87. Lim KE, Hsu YY, Hsu WC, Huang CC. Combined computed tomography venography and pulmonary angiography for the diagnosis PE and DVT in the ED. *Am J Emerg Med*. 2004;22(4):301-306.
  88. Begemann PG, Bonacker M, Kemper J, et al. Evaluation of the deep venous system in patients with suspected pulmonary embolism with multi-detector CT: a prospective study in comparison to Doppler sonography. *J Comput Assist Tomogr*. 2003;27(3):399-409.
  89. Loud PA, Katz DS, Bruce DA, Klippenstein DL, Grossman ZD. Deep venous thrombosis with suspected pulmonary embolism: detection with combined CT venography and pulmonary angiography. *Radiology*. 2001;219(2):498-502.
  90. Peterson DA, Kazerooni EA, Wakefield TW, et al. Computed tomographic venography is specific but not sensitive for diagnosis of acute lower-extremity deep venous thrombosis in patients with suspected pulmonary embolus. *J Vasc Surg*. 2001;34(5):798-804.
  91. Yoshida S, Akiba H, Tamakawa M, Yama N, Takeda M, Hareyama M. Spiral CT venography of the lower extremities by injection via an arm vein in patients with leg swelling. *Br J Radiol*. 2001;74(887):1013-1016.
  92. Ghaye B, Szapiro D, Willems V, Dondelinger RF. Combined CT venography of the lower limbs and spiral CT angiography of pulmonary arteries in acute pulmonary embolism: preliminary results of a prospective study. *JBR-BTR*. 2000;83(5):271-278.
  93. Cham MD, Yankelevitz DF, Shaham D, et al; The Pulmonary Angiography-Indirect CT Venography Cooperative Group. Deep venous thrombosis: detection by using indirect CT venography. *Radiology*. 2000;216(3):744-751.
  94. Garg K, Kemp JL, Wojcik D, et al. Thromboembolic disease: comparison of combined CT pulmonary angiography and venography with bilateral leg sonography in 70 patients. *AJR Am J Roentgenol*. 2000;175(4):997-1001.
  95. Coche EE, Hamoir XL, Hammer FD, Hainaut P, Goffette PP. Using dual-detector helical CT angiography to detect deep venous thrombosis in patients with suspicion of pulmonary embolism: diagnostic value and additional findings. *AJR Am J Roentgenol*. 2001;176(4):1035-1039.
  96. Duwe KM, Shiao M, Budorick NE, Austin JH, Berkmen YM; American Roentgen Ray Society. Evaluation of the lower extremity veins in patients with suspected pulmonary embolism: a retrospective comparison of helical CT venography and sonography. 2000 ARRS Executive Council Award I. *AJR Am J Roentgenol*. 2000;175(6):1525-1531.
  97. Shah AA, Buckshee N, Yankelevitz DF, Henschke CI. Assessment of deep venous thrombosis using routine pelvic CT. *AJR Am J Roentgenol*. 1999;173(3):659-663.
  98. Baldt MM, Zontsich T, Stümpflen A, et al. Deep venous thrombosis of the lower extremity: efficacy of spiral CT venography compared with conventional venography in diagnosis. *Radiology*. 1996;200(2):423-428.
  99. Sampson FC, Goodacre SW, Thomas SM, van Beek EJ. The accuracy of MRI in diagnosis of suspected deep vein thrombosis: systematic review and meta-analysis. *Eur Radiol*. 2007; 17(1):175-181.
  100. Cantwell CP, Cradock A, Bruzzi J, Fitzpatrick P, Eustace S, Murray JG. MR venography with true fast imaging with steady-state precession for suspected lower-limb deep vein thrombosis. *J Vasc Interv Radiol*. 2006;17(11 pt 1):1763-1769.
  101. Fraser DG, Moody AR, Davidson IR, Martel AL, Morgan PS. Deep venous thrombosis: diagnosis by using venous enhanced subtracted peak arterial MR venography versus conventional venography. *Radiology*. 2003;226(3):812-820.
  102. Sica GT, Pugach ME, Koniaris LS, et al. Isolated calf vein thrombosis: comparison of MR venography and conventional venography after initial sonography in symptomatic patients. *Acad Radiol*. 2001;8(9):856-863.
  103. Jensen AD, Borris LC, Christiansen TM, Lundorf E. Accuracy of magnetic resonance imaging in the diagnosis of deep vein thrombosis in asymptomatic patients with injuries of the lower extremity. A pilot study. *Thromb Res*. 2001;101(6):423-426.
  104. Catalano C, Pavone P, Laghi A, et al. Role of MR venography in the evaluation of deep venous thrombosis. *Acta Radiol*. 1997;38(5):907-912.
  105. Laissy JP, Cinqualbre A, Loshkajian A, et al. Assessment of deep venous thrombosis in the lower limbs and pelvis: MR

- venography versus duplex Doppler sonography. *AJR Am J Roentgenol*. 1996;167(4):971-975.
106. Larcom PG, Lotke PA, Steinberg ME, Holland G, Foster S. Magnetic resonance venography versus contrast venography to diagnose thrombosis after joint surgery. *Clin Orthop Relat Res*. 1996;331:209-215.
107. Evans AJ, Sostman HD, Witty LA, et al. Detection of deep venous thrombosis: prospective comparison of MR imaging and sonography. *J Magn Reson Imaging*. 1996;6(1):44-51.
108. Evans AJ, Sostman HD, Knelson MH, et al. 1992 ARRS Executive Council Award. Detection of deep venous thrombosis: prospective comparison of MR imaging with contrast venography. *AJR Am J Roentgenol*. 1993;161(1):131-139.
109. Carpenter JP, Holland GA, Baum RA, Owen RS, Carpenter JT, Cope C. Magnetic resonance venography for the detection of deep venous thrombosis: comparison with contrast venography and duplex Doppler ultrasonography. *J Vasc Surg*. 1993;18(5):734-741.
110. Spritzer CE, Norconk JJ Jr, Sostman HD, Coleman RE. Detection of deep venous thrombosis by magnetic resonance imaging. *Chest*. 1993;104(1):54-60.
111. Pope CF, Dietz MJ, Ezekowitz MD, Gore JC. Technical variables influencing the detection of acute deep vein thrombosis by magnetic resonance imaging. *Magn Reson Imaging*. 1991;9(3):379-388.
112. Vukov LF, Berquist TH, King BF. Magnetic resonance imaging for calf deep venous thrombophlebitis. *Ann Emerg Med*. 1991;20(5):497-499.
113. Erdman WA, Jayson HT, Redman HC, Miller GL, Parkey RW, Peshock RW. Deep venous thrombosis of extremities: role of MR imaging in the diagnosis. *Radiology*. 1990;174(2):425-431.
114. Fraser DG, Moody AR, Morgan PS, Martel AL, Davidson I. Diagnosis of lower-limb deep venous thrombosis: a prospective blinded study of magnetic resonance direct thrombus imaging. *Ann Intern Med*. 2002;136(2):89-98.
